# Supplementary material for: Differential DNA methylation at conserved non-genic elements and evidence for transgenerational inheritance following developmental exposure to mono(2-ethylhexyl) phthalate and 5-azacytidine in zebrafish
Source: Epigenetics Chromatin. 2017 Apr 12;10:20. doi: 10.1186/s13072-017-0126-4 (PMC5389146; doi:10.1186/s13072-017-0126-4)
Supplement: Supplementary file 4 — Additional file 4. A Microsoft Excel spreadsheet that contains all the DMRs and IPA output for 5AC. [file 13072_2017_126_MOESM4_ESM.xlsx]

## Sheet: GENERAL
		RESULTS RRBS
		Control vs 5AC

## Sheet: 10P0.01Q_tiles
	chr	start	end	strand	pvalue	qvalue	meth.diff		GREAT gene list		Biomart conversion
10	1	37801	38100	*	4.84424e-10	1.97513e-07	-23.063				Ensembl	Gene
93	1	1215601	1215900	*	1.08885e-05	0.000862687	-12.9883		a1cf		ENSDARG00000002968	ENSDART00000152292
216	1	3074101	3074400	*	1.71668e-06	0.000200866	10.9017		aars		ENSDARG00000069142	ENSDART00000100401
333	1	4775101	4775400	*	8.12976e-05	0.00404235	19.4265		abhd17c		ENSDARG00000069142	ENSDART00000136544
761	1	16554901	16555200	*	6.01196e-05	0.00321231	15.1809		abhd3		ENSDARG00000069142	ENSDART00000076695
769	1	16816801	16817100	*	0.000192906	0.00754604	11.2559		acanb		ENSDARG00000058452	ENSDART00000167273
773	1	16978501	16978800	*	9.99499e-08	1.96944e-05	-10.7762		acta1a		ENSDARG00000058452	ENSDART00000081323
870	1	19481701	19482000	*	2.08936e-06	0.000235628	12.7671		acy1		ENSDARG00000058452	ENSDART00000170655
2129	1	49454401	49454700	*	2.53644e-09	8.59652e-07	-14.8074		adamts9		ENSDARG00000018809	ENSDART00000023851
2139	1	49607101	49607400	*	3.95558e-07	6.22148e-05	-19.8105		adarb2		ENSDARG00000045799	ENSDART00000149917
2172	1	50245501	50245800	*	2.81772e-07	4.78693e-05	21.8976		add1		ENSDARG00000045799	ENSDART00000046249
2376	1	53335201	53335500	*	5.21794e-06	0.000492125	13.5716		adgb		ENSDARG00000036371	ENSDART00000052838
2425	1	54088201	54088500	*	1.3052e-08	3.69955e-06	13.9618		adka		ENSDARG00000036371	ENSDART00000139625
2694	2	770701	771000	*	5.2244e-08	1.16843e-05	12.7132		agbl4		ENSDARG00000038475	ENSDART00000056151
3370	2	11668801	11669100	*	5.82651e-06	0.000532468	-10.0182		agtpbp1		ENSDARG00000038475	ENSDART00000136550
3385	2	12108601	12108900	*	0.000226474	0.00846557	16.1293		aimp1		ENSDARG00000038475	ENSDART00000125048
3652	2	16037401	16037700	*	7.52888e-05	0.00381036	10.2002		akr7a3		ENSDARG00000038475	ENSDART00000148720
3740	2	18284701	18285000	*	2.1338e-05	0.00146884	12.6884		aktip		ENSDARG00000038475	ENSDART00000168711
3772	2	19144201	19144500	*	6.07301e-06	0.000547574	-14.8794		alcamb		ENSDARG00000038475	ENSDART00000010824
3773	2	19167901	19168200	*	9.39029e-05	0.00447002	-10.5609		amer2		ENSDARG00000038475	ENSDART00000169442
3801	2	19709401	19709700	*	2.00688e-10	9.01472e-08	16.5246		amy2a		ENSDARG00000077778	ENSDART00000109440
3900	2	22293601	22293900	*	8.88178e-15	1.04617e-11	12.2697		ank3b		ENSDARG00000077778	ENSDART00000138964
3916	2	22924201	22924500	*	1.59397e-05	0.00117019	-10.2396		ankhb		ENSDARG00000071823	ENSDART00000139596
4029	2	26753401	26753700	*	8.07844e-07	0.000108679	13.7176		ankib1b		ENSDARG00000071823	ENSDART00000158354
4031	2	26756401	26756700	*	2.05666e-07	3.62167e-05	16.0975		ano2		ENSDARG00000103962	ENSDART00000160144
4035	2	26773801	26774100	*	1.94323e-05	0.00136605	-14.9152		ano3		ENSDARG00000103962	ENSDART00000163608
4175	2	30865501	30865800	*	8.88178e-16	1.20711e-12	17.774		anxa6		ENSDARG00000103962	ENSDART00000171131
4207	2	32025601	32025900	*	0	0	23.9634		appl2		ENSDARG00000005595	ENSDART00000021575
4212	2	32160901	32161200	*	9.78161e-08	1.94913e-05	-14.1049		arfrp1		ENSDARG00000005595	ENSDART00000162935
4240	2	32877601	32877900	*	4.61627e-06	0.000447842	-15.0766		arl10		ENSDARG00000039429	ENSDART00000057605
4292	2	34033201	34033500	*	3.56436e-07	5.79531e-05	-15.0807		armc8		ENSDARG00000039429	ENSDART00000144227
4364	2	36774901	36775200	*	0.000148237	0.00622601	10.0224		arnt		ENSDARG00000039429	ENSDART00000144989
4704	2	46549501	46549800	*	2.52627e-08	6.53188e-06	-23.7191		asb13a.2		ENSDARG00000039429	ENSDART00000123596
4715	2	46897201	46897500	*	1.24882e-06	0.000156855	18.6148		ascl1a		ENSDARG00000039429	ENSDART00000159585
4814	2	49768501	49768800	*	1.01125e-06	0.000131053	-10.8304		asic1b		ENSDARG00000068050	ENSDART00000132908
4851	2	50356801	50357100	*	9.20094e-05	0.00440443	-10.9422		asic2		ENSDARG00000068050	ENSDART00000151746
4977	2	52862401	52862700	*	0.000230465	0.0085831	-11.0845		atad2b		ENSDARG00000068050	ENSDART00000132005
5011	2	53448901	53449200	*	2.22622e-12	1.63888e-09	-14.8328		atic		ENSDARG00000068050	ENSDART00000162011
5149	2	55275601	55275900	*	5.70585e-06	0.000524153	-10.7415		atoh1a		ENSDARG00000105214	ENSDART00000172642
5153	2	55281601	55281900	*	7.83151e-12	4.66411e-09	-11.5013		atp11c		ENSDARG00000105214	ENSDART00000159782
5225	2	56126701	56127000	*	4.88076e-06	0.000466971	-10.5804		atp1a1b		ENSDARG00000060036	ENSDART00000084184
5439	2	59459101	59459400	*	5.70572e-06	0.000524153	11.0323		atp1a3a		ENSDARG00000016649	ENSDART00000014871
5851	3	7065301	7065600	*	1.43697e-07	2.66293e-05	-10.239		atp1b3b		ENSDARG00000026862	ENSDART00000146202
6135	3	11896201	11896500	*	1.18058e-06	0.000149704	12.1051		atp6v0cb		ENSDARG00000026862	ENSDART00000029565
6226	3	14014801	14015100	*	4.50442e-05	0.00257556	-12.3852		atp6v1h		ENSDARG00000026862	ENSDART00000136545
6265	3	14599801	14600100	*	0.000110647	0.0050041	10.8802		atp7a		ENSDARG00000026862	ENSDART00000138893
6285	3	14868301	14868600	*	4.09228e-08	9.64043e-06	22.1578		atp8a2		ENSDARG00000026862	ENSDART00000138409
6457	3	19654201	19654500	*	5.15339e-05	0.0028602	-10.4138		atpv0e1		ENSDARG00000058538	ENSDART00000101204
6550	3	23163001	23163300	*	0.000104584	0.00482038	11.8985		auts2		ENSDARG00000075222	ENSDART00000115165
6716	3	27972601	27972900	*	9.025e-06	0.000740504	11.6157		b3gat1		ENSDARG00000013856	ENSDART00000003035
6762	3	28949401	28949700	*	5.06586e-05	0.00282052	14.9369		b3gnt2b		ENSDARG00000013856	ENSDART00000156259
6863	3	32231401	32231700	*	0.000238826	0.00877259	18.6355		bai3		ENSDARG00000077582	ENSDART00000148866
6908	3	33856501	33856800	*	5.8048e-11	2.87552e-08	11.5802		barhl2		ENSDARG00000077582	ENSDART00000149594
6938	3	35139001	35139300	*	2.16051e-08	5.69736e-06	19.4883		barx2		ENSDARG00000077582	ENSDART00000149453
6995	3	37215901	37216200	*	0	0	-22.5618		baz1b		ENSDARG00000077582	ENSDART00000148673
7003	3	37682401	37682700	*	2.30038e-13	2.10225e-10	-16.1997		bbip1		ENSDARG00000077582	ENSDART00000088100
7147	3	41912101	41912400	*	5.13775e-08	1.15392e-05	-15.9995		bcas3		ENSDARG00000014969	ENSDART00000012413
7172	3	42591901	42592200	*	5.93232e-05	0.00319134	-10.518		bcl11aa		ENSDARG00000076829	ENSDART00000131227
7313	3	47289001	47289300	*	0.000106753	0.00487293	-10.3944		bcl2		ENSDARG00000101363	ENSDART00000164810
7671	3	55866901	55867200	*	1.92286e-05	0.00135353	-10.8674		blm		ENSDARG00000101363	ENSDART00000171079
7676	3	55892401	55892700	*	0.000243802	0.00887541	11.4023		bmp1a		ENSDARG00000058015	ENSDART00000155721
7742	3	56880601	56880900	*	1.56541e-14	1.72863e-11	-17.5704		bmp2k		ENSDARG00000058015	ENSDART00000122213
7761	3	57126001	57126300	*	0.000153319	0.00638883	-11.2146		bmp5		ENSDARG00000013335	ENSDART00000148882
7777	3	57312301	57312600	*	0.000107535	0.00488282	10.371		bmp7a		ENSDARG00000013335	ENSDART00000148807
7866	3	58246201	58246500	*	6.89132e-08	1.46109e-05	-18.1989		bmper		ENSDARG00000013335	ENSDART00000006073
8143	3	61622401	61622700	*	0.000156568	0.00647335	12.732		bmpr1bb		ENSDARG00000013335	ENSDART00000126260
8203	4	138601	138900	*	5.33932e-06	0.000499132	14.6465		bmpr2b		ENSDARG00000013335	ENSDART00000105346
8204	4	138901	139200	*	1.78611e-06	0.000208071	17.5226		bnip3la		ENSDARG00000078139	ENSDART00000112853
8205	4	139501	139800	*	0.000140041	0.00601093	14.6828		btk		ENSDARG00000078139	ENSDART00000172088
8206	4	139801	140100	*	2.34035e-13	2.10253e-10	23.1099		btr04		ENSDARG00000057857	ENSDART00000128062
8242	4	464101	464400	*	1.21025e-05	0.000941978	-12.0671		bub3		ENSDARG00000057857	ENSDART00000157327
8452	4	4288801	4289100	*	0.000107268	0.00487702	13.6673		c1qtnf1		ENSDARG00000060775	ENSDART00000086001
8653	4	8501701	8502000	*	1.72738e-05	0.00124232	-20.908		ca8		ENSDARG00000060775	ENSDART00000139500
8673	4	8829901	8830200	*	8.20034e-10	3.10468e-07	-19.4068		cacna1g		ENSDARG00000060775	ENSDART00000141244
8677	4	8871301	8871600	*	0.000138662	0.00597052	10.6913		cacna1i		ENSDARG00000060775	ENSDART00000140027
8678	4	8871601	8871900	*	9.24733e-06	0.000752919	11.1157		cacnb4b		ENSDARG00000062258	ENSDART00000133997
8738	4	10311601	10311900	*	8.89066e-06	0.000731747	-10.1371		cacng3b		ENSDARG00000062258	ENSDART00000163095
8769	4	11217601	11217900	*	1.19869e-08	3.4719e-06	-16.8315		cadm1b		ENSDARG00000021855	ENSDART00000081852
8788	4	11561101	11561400	*	0.000227299	0.00849039	10.1629		cadm2a		ENSDARG00000021855	ENSDART00000029485
8903	4	14720401	14720700	*	1.22782e-05	0.000948685	-12.2424		calcr		ENSDARG00000021855	ENSDART00000123253
8975	4	17018101	17018400	*	4.28424e-12	2.76932e-09	22.2309		calml4b		ENSDARG00000021855	ENSDART00000127554
8981	4	17212201	17212500	*	6.56359e-05	0.00344797	-14.3548		caln2		ENSDARG00000021855	ENSDART00000121648
8992	4	17499901	17500200	*	1.09666e-07	2.11374e-05	-23.1439		calrl		ENSDARG00000045765	ENSDART00000140954
9021	4	18615901	18616200	*	6.29162e-06	0.000561421	14.9024		calub		ENSDARG00000038386	ENSDART00000056005
9660	4	41835901	41836200	*	7.28256e-08	1.53788e-05	-10.1765		camta1a		ENSDARG00000101866	ENSDART00000171359
9821	4	49682401	49682700	*	3.11766e-06	0.000329841	16.0699		caprin1b		ENSDARG00000101866	ENSDART00000165549
10085	4	63194101	63194400	*	3.52677e-06	0.0003588	11.6561		casc3		ENSDARG00000006849	ENSDART00000137038
10591	4	73857601	73857900	*	0.000163839	0.00669562	-11.3951		casp3a		ENSDARG00000006849	ENSDART00000039517
10975	5	3375301	3375600	*	2.13385e-13	2.05643e-10	20.3154		casz1		ENSDARG00000006849	ENSDART00000084803
10987	5	3509701	3510000	*	5.83206e-05	0.00314792	-14.9357		cbfa2t2		ENSDARG00000060537	ENSDART00000149000
11009	5	3809101	3809400	*	5.36527e-07	7.8559e-05	18.2526		ccdc153		ENSDARG00000060537	ENSDART00000149775
11210	5	6822001	6822300	*	0.000133117	0.00574578	13.2465		ccdc170		ENSDARG00000060537	ENSDART00000148998
11213	5	6829501	6829800	*	0.000169662	0.00685955	-10.9384		ccnd1		ENSDARG00000060537	ENSDART00000085416
11389	5	10225201	10225500	*	6.87199e-10	2.67829e-07	16.4075		ccne1		ENSDARG00000016706	ENSDART00000137670
11397	5	10482601	10482900	*	0.000159122	0.00655336	-11.635		ccni		ENSDARG00000016706	ENSDART00000139261
11456	5	12401701	12402000	*	0	0	11.2988		ccnl1a		ENSDARG00000016706	ENSDART00000136282
11497	5	13560301	13560600	*	3.19302e-05	0.00196459	10.7748		cdc5l		ENSDARG00000016706	ENSDART00000022307
11514	5	14146201	14146500	*	0.000145207	0.00612791	-13.0806		cdh13		ENSDARG00000016706	ENSDART00000141973
11567	5	15594601	15594900	*	0.000286999	0.00999492	13.3787		cdkl5		ENSDARG00000055294	ENSDART00000077642
11662	5	18432601	18432900	*	2.65094e-05	0.00173675	-12.7368		cdkn1ba		ENSDARG00000036442	ENSDART00000167282
11677	5	19195201	19195500	*	5.47406e-06	0.00050993	-10.2422		cdx4		ENSDARG00000036442	ENSDART00000052938
11751	5	21998101	21998400	*	3.70495e-06	0.000372636	15.7943		celf3b		ENSDARG00000036442	ENSDART00000165463
11795	5	23263501	23263800	*	5.3855e-08	1.1894e-05	-12.1352		cers3b		ENSDARG00000036442	ENSDART00000165865
12296	5	38550601	38550900	*	4.37196e-07	6.77585e-05	-11.5261		cga		ENSDARG00000019856	ENSDART00000005086
12436	5	41722801	41723100	*	1.78678e-11	9.66403e-09	-17.7294		ch1073-291c23.1		ENSDARG00000018259	ENSDART00000104950
12437	5	41723101	41723400	*	7.82086e-12	4.66411e-09	-19.2836		chmp1a		ENSDARG00000042837	ENSDART00000062874
12444	5	41864401	41864700	*	4.66091e-05	0.00263942	-13.3622		chrna3		ENSDARG00000036577	ENSDART00000053139
12511	5	43822501	43822800	*	9.12292e-05	0.00437607	-19.5226		chrnb1		ENSDARG00000006370	ENSDART00000019029
12585	5	45960901	45961200	*	3.21763e-05	0.00197623	-14.6633		cited4a		ENSDARG00000006370	ENSDART00000138122
12638	5	47550601	47550900	*	0.000231564	0.0086133	-14.8663		clcn1a		ENSDARG00000006370	ENSDART00000145681
12642	5	47609701	47610000	*	3.81604e-10	1.61814e-07	10.9653		cldn15a		ENSDARG00000006370	ENSDART00000139697
12690	5	49299301	49299600	*	3.95766e-05	0.00233201	-18.8761		cldn2		ENSDARG00000003699	ENSDART00000054977
13062	5	61332901	61333200	*	6.91127e-05	0.00359146	-10.3732		clec14a		ENSDARG00000003699	ENSDART00000124072
13063	5	61333201	61333500	*	0.000219808	0.00830423	-11.5743		clint1a		ENSDARG00000077492	ENSDART00000109848
13104	5	62387401	62387700	*	4.1554e-05	0.00242036	13.4731		cln5		ENSDARG00000077492	ENSDART00000152093
13433	5	67461601	67461900	*	2.18825e-13	2.0712e-10	-19.9648		cmasa		ENSDARG00000077492	ENSDART00000153695
13521	5	68856601	68856900	*	3.0318e-05	0.00189058	-19.9654		cngb1a		ENSDARG00000091902	ENSDART00000140767
13702	5	71444101	71444400	*	0.000105616	0.00484686	-11.4933		cnih4		ENSDARG00000091902	ENSDART00000139063
13703	5	71444401	71444700	*	0.000106463	0.00486921	-13.2215		cntnap5b		ENSDARG00000091902	ENSDART00000132755
13729	5	71673901	71674200	*	2.23741e-08	5.87095e-06	-13.08		coa3		ENSDARG00000104361	ENSDART00000165609
13901	6	2248801	2249100	*	8.23141e-05	0.0040788	12.1581		coasy		ENSDARG00000104361	ENSDART00000163726
14019	6	3987301	3987600	*	0.000112335	0.00504601	-10.069		col18a1		ENSDARG00000041098	ENSDART00000138806
14044	6	4254001	4254300	*	3.94519e-05	0.00232865	-12.4541		col19a1		ENSDARG00000102832	ENSDART00000158503
14046	6	4261801	4262100	*	5.62861e-08	1.22774e-05	-18.4679		col1a1a		ENSDARG00000102832	ENSDART00000162896
14196	6	6737101	6737400	*	0	0	-28.4433		col4a5		ENSDARG00000102832	ENSDART00000162052
14340	6	9857401	9857700	*	0	0	18.6888		col9a1		ENSDARG00000102832	ENSDART00000169621
14431	6	11675101	11675400	*	6.45199e-05	0.00340324	-12.1839		coro1b		ENSDARG00000071046	ENSDART00000146280
14446	6	11988901	11989200	*	7.57631e-05	0.00382456	14.3739		coro7		ENSDARG00000090764	ENSDART00000149957
14454	6	12107101	12107400	*	7.24449e-10	2.80285e-07	-12.6001		cpb1		ENSDARG00000090764	ENSDART00000079294
14459	6	12185101	12185400	*	0.000238626	0.00877134	-10.9857		cpeb1a		ENSDARG00000090764	ENSDART00000077172
14571	6	14650501	14650800	*	0.000215141	0.00818039	-13.8813		cps1		ENSDARG00000061352	ENSDART00000087426
14617	6	15572701	15573000	*	0.000246331	0.00891848	13.8158		crebl2		ENSDARG00000061352	ENSDART00000132521
14618	6	15582901	15583200	*	4.22638e-07	6.56942e-05	-16.3485		crispld1a		ENSDARG00000077089	ENSDART00000142686
14645	6	16189201	16189500	*	8.76492e-08	1.77999e-05	10.4664		crls1		ENSDARG00000077089	ENSDART00000144783
15044	6	24211501	24211800	*	7.22256e-12	4.45149e-09	13.5049		crygmxl1		ENSDARG00000077089	ENSDART00000110746
15082	6	24932701	24933000	*	1.29755e-06	0.000161446	18.9489		csnk1g2b		ENSDARG00000028071	ENSDART00000127875
15120	6	25750501	25750800	*	0.000233038	0.0086378	-10.119		csrnp1b		ENSDARG00000020009	ENSDART00000006079
15261	6	28974901	28975200	*	0	0	16.1397		cttn		ENSDARG00000020009	ENSDART00000166657
15394	6	32989801	32990100	*	1.39555e-12	1.10404e-09	-13.8471		cuedc2		ENSDARG00000101701	ENSDART00000161162
15472	6	35343901	35344200	*	1.3803e-06	0.00016975	10.6177		cul1b		ENSDARG00000018260	ENSDART00000016472
15482	6	35714101	35714400	*	6.75204e-05	0.00353296	14.0597		cux2b		ENSDARG00000018260	ENSDART00000143942
15764	6	44186701	44187000	*	7.78276e-08	1.62001e-05	11.5336		cx39.4		ENSDARG00000101980	ENSDART00000168830
15930	6	49503901	49504200	*	4.81525e-07	7.27285e-05	21.9124		cxcl14		ENSDARG00000101980	ENSDART00000160383
15935	6	49719901	49720200	*	3.18147e-07	5.26977e-05	12.337		cxcr4b		ENSDARG00000101980	ENSDART00000163281
15944	6	50074201	50074500	*	1.55612e-06	0.000187033	-12.5864		cxcr7b		ENSDARG00000101980	ENSDART00000168274
15989	6	50697001	50697300	*	3.80156e-07	6.0443e-05	10.4439		cybrd1		ENSDARG00000101980	ENSDART00000162610
16139	6	53544001	53544300	*	0.000280139	0.00982053	13.8004		cyp4t8		ENSDARG00000075729	ENSDART00000114261
16354	6	56894701	56895000	*	1.63421e-11	9.023e-09	-17.1822		cyp7a1a		ENSDARG00000102742	ENSDART00000159412
16396	6	57641401	57641700	*	0	0	27.7835		cyth3		ENSDARG00000020057	ENSDART00000125961
16399	6	57699301	57699600	*	3.72207e-11	1.87892e-08	10.6435		dapk1		ENSDARG00000020057	ENSDART00000137937
16874	7	5649901	5650200	*	1.13989e-07	2.1812e-05	11.3599		dbn1		ENSDARG00000025468	ENSDART00000035676
17096	7	8790301	8790600	*	2.10867e-06	0.000236799	-18.4182		dbr1		ENSDARG00000004433	ENSDART00000148737
17191	7	10408801	10409100	*	1.92845e-07	3.4504e-05	-10.8288		dck		ENSDARG00000075883	ENSDART00000153244
17272	7	12124501	12124800	*	1.07244e-09	3.89344e-07	-15.4402		ddb1		ENSDARG00000075883	ENSDART00000153283
17307	7	12528001	12528300	*	4.46719e-05	0.00255703	-13.4912		ddx27		ENSDARG00000088878	ENSDART00000152908
17442	7	15885301	15885600	*	4.13825e-06	0.000409992	-13.3542		derl3		ENSDARG00000088878	ENSDART00000162483
17527	7	18321901	18322200	*	5.99685e-05	0.00321071	-11.3574		dhdhl		ENSDARG00000039098	ENSDART00000140012
17595	7	20682601	20682900	*	6.07445e-06	0.000547574	10.2527		dhrs11a		ENSDARG00000089913	ENSDART00000153256
17600	7	20879101	20879400	*	8.77235e-05	0.00423089	16.8492		dhrs13a.3		ENSDARG00000089913	ENSDART00000123534
17655	7	22221901	22222200	*	5.84687e-06	0.000533409	-11.9383		diabloa		ENSDARG00000070522	ENSDART00000145615
17801	7	27854101	27854400	*	1.11498e-05	0.000881471	24.6043		diaph2		ENSDARG00000070522	ENSDART00000085216
18034	7	35392801	35393100	*	1.32515e-06	0.00016411	14.682		disc1		ENSDARG00000062174	ENSDART00000089577
18037	7	35464501	35464800	*	4.75851e-07	7.22701e-05	-10.3397		dla		ENSDARG00000062174	ENSDART00000149177
18055	7	35901301	35901600	*	1.16092e-05	0.000912968	-13.6533		dlgap1b		ENSDARG00000062174	ENSDART00000122023
18192	7	40997401	40997700	*	3.9968e-15	4.92671e-12	-15.7524		dlgap3		ENSDARG00000062174	ENSDART00000089564
18303	7	45337201	45337500	*	2.93576e-07	4.92433e-05	17.8475		dmgdh		ENSDARG00000062174	ENSDART00000171643
18336	7	46074301	46074600	*	8.85223e-07	0.000117302	21.5948		dnaja2l		ENSDARG00000062174	ENSDART00000162696
18342	7	46170901	46171200	*	1.27474e-06	0.000159733	11.0976		dnajc19		ENSDARG00000062174	ENSDART00000159646
18369	7	46819801	46820100	*	1.31632e-08	3.71123e-06	11.4552		dnajc27		ENSDARG00000076401	ENSDART00000110126
18499	7	50973301	50973600	*	1.45439e-14	1.6402e-11	11.6109		dnal1		ENSDARG00000042677	ENSDART00000157161
18623	7	54436501	54436800	*	0.000104577	0.00482038	-14.2632		dntt		ENSDARG00000042677	ENSDART00000062603
18691	7	56985901	56986200	*	1.76195e-05	0.00126375	11.6605		dock1		ENSDARG00000042677	ENSDART00000166555
19478	7	73704901	73705200	*	7.66054e-14	7.96163e-11	-11.3556		dohh		ENSDARG00000009930	ENSDART00000135475
19506	7	74010001	74010300	*	4.35149e-05	0.00250581	16.1385		dpf1		ENSDARG00000009930	ENSDART00000056369
19795	8	4125301	4125600	*	1.96882e-07	3.5019e-05	14.0594		dph1		ENSDARG00000028845	ENSDART00000131471
19803	8	4246501	4246800	*	5.86359e-07	8.38413e-05	15.3817		dpyda		ENSDARG00000059347	ENSDART00000157163
19855	8	5083801	5084100	*	6.74158e-05	0.00353296	10.2463		dpydb		ENSDARG00000059347	ENSDART00000156532
19857	8	5091901	5092200	*	2.06912e-05	0.00143739	-10.5176		drd4b		ENSDARG00000059347	ENSDART00000156062
19874	8	5386201	5386500	*	2.6803e-05	0.00174745	12.3545		drg1		ENSDARG00000059347	ENSDART00000082447
19896	8	5803801	5804100	*	1.85117e-05	0.00131705	10.5495		dync1i2a		ENSDARG00000069766	ENSDART00000141149
20161	8	10754101	10754400	*	8.57844e-07	0.000113959	-15.7752		dync1li1		ENSDARG00000005115	ENSDART00000005405
20203	8	11920201	11920500	*	8.88178e-16	1.20711e-12	-18.8372		ebf1a		ENSDARG00000005115	ENSDART00000148485
20336	8	15575401	15575700	*	3.50503e-06	0.000357274	-15.3547		ebf3		ENSDARG00000005115	ENSDART00000127138
20501	8	20718901	20719200	*	0.000143243	0.00609353	-10.1114		edar		ENSDARG00000077428	ENSDART00000146633
20610	8	23497501	23497800	*	2.33119e-05	0.00157205	-19.5429		edil3		ENSDARG00000077428	ENSDART00000046059
20712	8	26572201	26572500	*	1.2215e-05	0.000947947	-12.1293		efcab2		ENSDARG00000054272	ENSDART00000098889
20823	8	28960801	28961100	*	0.000142832	0.00608623	11.8091		efna2		ENSDARG00000054272	ENSDART00000145383
20862	8	30112801	30113100	*	8.43207e-11	4.02647e-08	-14.7075		efnb3b		ENSDARG00000054272	ENSDART00000143016
20886	8	30874801	30875100	*	0	0	16.0088		egln3		ENSDARG00000054272	ENSDART00000139519
20983	8	33675301	33675600	*	1.12059e-06	0.000143469	11.3027		eif1b		ENSDARG00000029911	ENSDART00000040065
20998	8	34099201	34099500	*	0.000205483	0.00789812	-13.1447		eif2b1		ENSDARG00000029911	ENSDART00000153732
21771	8	49842601	49842900	*	0.000237226	0.00875117	14.2151		eif2b3		ENSDARG00000017905	ENSDART00000139702
21773	8	49850401	49850700	*	3.26412e-05	0.00199784	15.2767		eif2s2		ENSDARG00000017905	ENSDART00000140076
21879	8	51024901	51025200	*	0.000174096	0.00698554	-10.6907		eif3hb		ENSDARG00000017905	ENSDART00000005593
22392	9	3281401	3281700	*	5.41928e-07	7.91313e-05	21.5501		eif3hb		ENSDARG00000017905	ENSDART00000131927
22407	9	3569701	3570000	*	3.44861e-06	0.000353562	16.8465		eif4e1b		ENSDARG00000037030	ENSDART00000148257
22676	9	7998001	7998300	*	2.91309e-05	0.00183818	13.4372		elfn2		ENSDARG00000037030	ENSDART00000002812
22767	9	10556101	10556400	*	9.76191e-05	0.00459118	-15.2433		emx2		ENSDARG00000074337	ENSDART00000083807
22853	9	13056601	13056900	*	2.77767e-05	0.00179289	-15.4733		eno3		ENSDARG00000074337	ENSDART00000155438
23041	9	17000701	17001000	*	1.46094e-06	0.000177606	-10.3756		enosf1		ENSDARG00000074337	ENSDART00000168708
23198	9	21374101	21374400	*	0.000182888	0.00726678	10.6473		enpp7		ENSDARG00000077161	ENSDART00000110360
23199	9	21374401	21374700	*	6.7113e-13	5.73757e-10	16.2628		epb41l4a		ENSDARG00000077161	ENSDART00000155139
23233	9	22224301	22224600	*	7.98183e-08	1.65263e-05	-14.7842		epc1		ENSDARG00000016161	ENSDART00000156771
23419	9	28060801	28061100	*	1.39021e-11	7.92338e-09	-11.3275		epm2a		ENSDARG00000016161	ENSDART00000157184
23439	9	28677301	28677600	*	0.000100442	0.00468653	13.0963		epor		ENSDARG00000016161	ENSDART00000041211
23440	9	28677601	28677900	*	8.18993e-07	0.000109622	12.8349		eprs		ENSDARG00000101637	ENSDART00000165320
23666	9	36051901	36052200	*	2.74946e-08	6.90683e-06	11.0743		erbb4b		ENSDARG00000101637	ENSDART00000170774
23747	9	39356701	39357000	*	8.32405e-05	0.0041043	-10.8691		erh		ENSDARG00000101637	ENSDART00000162795
23843	9	42226201	42226500	*	4.08372e-06	0.000406463	10.8143		esrrb		ENSDARG00000101637	ENSDART00000171395
23846	9	42282301	42282600	*	3.59985e-07	5.81732e-05	-11.0672		esrrga		ENSDARG00000101637	ENSDART00000163748
23967	9	45996601	45996900	*	3.65401e-08	8.76688e-06	-21.2903		etnk1		ENSDARG00000098622	ENSDART00000163991
24293	9	52182601	52182900	*	4.80603e-08	1.09331e-05	-17.043		etv7		ENSDARG00000098622	ENSDART00000170294
24297	9	52191601	52191900	*	1.09261e-07	2.11362e-05	13.4094		exoc3		ENSDARG00000098622	ENSDART00000169822
24536	9	55988101	55988400	*	0.00017666	0.00707767	10.5233		ezrb		ENSDARG00000068214	ENSDART00000127854
24622	10	631201	631500	*	4.64458e-08	1.06114e-05	13.8614		fah		ENSDARG00000068214	ENSDART00000129351
24641	10	847801	848100	*	1.21389e-05	0.000943425	-11.9645		faimb		ENSDARG00000068214	ENSDART00000151202
24691	10	1750201	1750500	*	4.33182e-05	0.00250388	-12.6383		fam133b		ENSDARG00000068214	ENSDART00000075137
24724	10	2269501	2269800	*	3.26091e-07	5.3678e-05	-17.3989		fam154b		ENSDARG00000055124	ENSDART00000141027
24866	10	4168501	4168800	*	9.50755e-06	0.000769421	10.0957		fam167aa		ENSDARG00000055124	ENSDART00000077435
25053	10	7515901	7516200	*	6.29162e-05	0.00333485	-12.2716		fam172a		ENSDARG00000055124	ENSDART00000139696
25171	10	9845401	9845700	*	3.38552e-08	8.19397e-06	-15.5057		fam204a		ENSDARG00000055124	ENSDART00000136692
25215	10	11182201	11182500	*	7.56201e-06	0.000650683	10.5971		fam222a		ENSDARG00000055124	ENSDART00000134284
25266	10	11967901	11968200	*	1.07157e-08	3.17306e-06	14.1209		fam49ba		ENSDARG00000055124	ENSDART00000126563
25328	10	12482401	12482700	*	2.11005e-08	5.5921e-06	16.8194		fam5ca		ENSDARG00000043797	ENSDART00000064313
25370	10	13305601	13305900	*	2.77279e-06	0.000298801	-13.5136		fancc		ENSDARG00000043797	ENSDART00000121806
25543	10	17668801	17669100	*	0.000262145	0.00936313	10.1354		fancl		ENSDARG00000014215	ENSDART00000136754
25555	10	17773801	17774100	*	7.74824e-11	3.76781e-08	11.7684		fat1		ENSDARG00000014215	ENSDART00000169552
25569	10	18104401	18104700	*	1.23232e-06	0.00015515	-22.6721		fbxl14a		ENSDARG00000015240	ENSDART00000157385
25608	10	19146601	19146900	*	0.000181354	0.00722209	-12.4695		fbxl14b		ENSDARG00000015240	ENSDART00000127502
25621	10	19710001	19710300	*	0	0	18.2685		fgf11a		ENSDARG00000015240	ENSDART00000010026
25629	10	20027401	20027700	*	0	0	-13.4015		fgf18a		ENSDARG00000029018	ENSDART00000049061
25647	10	20796001	20796300	*	5.12512e-12	3.27295e-09	-19.2003		fgfr3		ENSDARG00000029018	ENSDART00000147220
25679	10	21699301	21699600	*	1.40642e-09	4.93688e-07	-10.3253		fhit		ENSDARG00000036292	ENSDART00000114973
25741	10	23196301	23196600	*	0.000147053	0.00619101	14.3847		flncb		ENSDARG00000036292	ENSDART00000052709
25773	10	24369301	24369600	*	2.91066e-06	0.000311044	-11.9921		flot2a		ENSDARG00000006983	ENSDART00000148426
25790	10	24881101	24881400	*	9.82134e-05	0.00460687	11.9433		flot2b		ENSDARG00000006983	ENSDART00000024206
25809	10	25731301	25731600	*	3.63035e-05	0.0021722	16.0787		fmnl1a		ENSDARG00000036337	ENSDART00000052792
25878	10	27409801	27410100	*	0.000126983	0.00551241	19.0949		fmnl3		ENSDARG00000036337	ENSDART00000132420
25882	10	27518401	27518700	*	6.55899e-05	0.00344797	17.1358		fmr1		ENSDARG00000036337	ENSDART00000172404
25887	10	27644401	27644700	*	0.000240091	0.00878368	-13.4827		foxc1a		ENSDARG00000040479	ENSDART00000155293
26040	10	32215201	32215500	*	0.000251356	0.0090726	12.8967		foxg1b		ENSDARG00000040479	ENSDART00000053888
26353	10	39210001	39210300	*	1.98015e-05	0.00138648	-13.1468		foxi1		ENSDARG00000040479	ENSDART00000059245
26633	10	43761001	43761300	*	1.07267e-07	2.08266e-05	-13.9342		foxi2		ENSDARG00000063631	ENSDART00000137398
26984	11	3142201	3142500	*	3.23108e-12	2.22418e-09	-17.9417		foxn3		ENSDARG00000063631	ENSDART00000093160
27090	11	4400401	4400700	*	7.49198e-05	0.00380737	16.9451		foxp1a		ENSDARG00000102643	ENSDART00000171602
27248	11	7077301	7077600	*	2.49937e-08	6.49403e-06	-20.0943		foxp4		ENSDARG00000102643	ENSDART00000169192
27322	11	8633701	8634000	*	8.51132e-05	0.00415031	-11.6184		frem1b		ENSDARG00000102643	ENSDART00000164390
27716	11	17969101	17969400	*	5.98142e-08	1.28357e-05	-12.5693		fscn2a		ENSDARG00000100991	ENSDART00000160975
27761	11	18960001	18960300	*	7.57183e-12	4.61312e-09	-12.9223		fstl5		ENSDARG00000100991	ENSDART00000159299
27770	11	19338601	19338900	*	2.0043e-05	0.00139786	11.1288		ftr01		ENSDARG00000069660	ENSDART00000101528
27841	11	21510901	21511200	*	1.41613e-05	0.00106621	-12.0416		fzd1		ENSDARG00000069660	ENSDART00000149774
27843	11	21576601	21576900	*	1.20454e-05	0.000938917	14.0731		fzd7a		ENSDARG00000035990	ENSDART00000133059
27864	11	22245901	22246200	*	3.29029e-08	8.0741e-06	19.7725		fzd8a		ENSDARG00000062084	ENSDART00000041094
28117	11	29983801	29984100	*	2.54792e-06	0.000279031	15.5024		g3bp1		ENSDARG00000062084	ENSDART00000172628
28177	11	31932901	31933200	*	4.65932e-05	0.00263942	-11.7727		gabrb2		ENSDARG00000036463	ENSDART00000052977
28560	11	39390601	39390900	*	3.58702e-06	0.000362149	-10.1149		gadd45gip1		ENSDARG00000044387	ENSDART00000065183
28626	11	40486801	40487100	*	3.91341e-05	0.00231505	-10.5419		gal3st1		ENSDARG00000103533	ENSDART00000170420
28655	11	40832101	40832400	*	0.000212867	0.00811116	12.4399		galcb		ENSDARG00000025535	ENSDART00000144702
28684	11	41150701	41151000	*	0.000150054	0.00628737	10.1734		gapvd1		ENSDARG00000025535	ENSDART00000169712
28727	11	41691301	41691600	*	5.41336e-08	1.19059e-05	-13.0887		gatm		ENSDARG00000025535	ENSDART00000143818
28791	11	42743701	42744000	*	7.89882e-05	0.00395722	-10.6085		gbgt1l2		ENSDARG00000057334	ENSDART00000124189
28922	11	44472301	44472600	*	2.08826e-05	0.00144689	-16.5674		gbx2		ENSDARG00000057334	ENSDART00000131666
29058	12	1581901	1582200	*	0.00025984	0.00932477	-11.5361		gc2		ENSDARG00000057334	ENSDART00000158094
29183	12	3642001	3642300	*	4.11694e-10	1.72394e-07	-11.1123		gfra1a		ENSDARG00000057334	ENSDART00000079968
29338	12	6144301	6144600	*	5.67849e-06	0.000524153	-12.3439		gfra2b		ENSDARG00000068242	ENSDART00000140089
29372	12	6907501	6907800	*	5.76579e-09	1.8522e-06	17.0611		ggctb		ENSDARG00000087759	ENSDART00000126759
29423	12	7838401	7838700	*	5.12953e-05	0.00284998	13.5569		gla		ENSDARG00000075189	ENSDART00000134035
29556	12	10469401	10469700	*	1.16663e-07	2.20845e-05	12.5614		glis3		ENSDARG00000075189	ENSDART00000110136
29704	12	14075401	14075700	*	1.11611e-08	3.26846e-06	14.0906		glmnb		ENSDARG00000042747	ENSDART00000062736
29808	12	15317401	15317700	*	4.06873e-06	0.000406142	-10.0335		glra1		ENSDARG00000042747	ENSDART00000148868
29833	12	15919501	15919800	*	2.48837e-06	0.000273074	-13.7915		glsa		ENSDARG00000036558	ENSDART00000130434
29925	12	17417101	17417400	*	1.03297e-07	2.01294e-05	-18.641		glula		ENSDARG00000036558	ENSDART00000097295
30245	12	27088501	27088800	*	0.000113926	0.00509587	-14.3146		gna11b		ENSDARG00000036558	ENSDART00000007058
30263	12	27691801	27692100	*	6.58197e-07	9.20513e-05	14.2462		gnal		ENSDARG00000096073	ENSDART00000110976
30299	12	29105701	29106000	*	1.35454e-09	4.78646e-07	16.1741		gnb1b		ENSDARG00000076163	ENSDART00000145979
30367	12	31299301	31299600	*	2.32288e-05	0.00156845	11.6243		gng2		ENSDARG00000012405	ENSDART00000009393
30419	12	33073501	33073800	*	4.55334e-06	0.000446114	13.2427		gpc1b		ENSDARG00000012405	ENSDART00000140586
30435	12	33509101	33509400	*	4.96603e-13	4.38703e-10	12.221		gpd2		ENSDARG00000012405	ENSDART00000047010
30454	12	34160401	34160700	*	1.43214e-05	0.00107369	12.6451		gphnb		ENSDARG00000052063	ENSDART00000073827
30742	12	42321901	42322200	*	5.29843e-09	1.71244e-06	16.0236		gpib		ENSDARG00000052063	ENSDART00000108738
30764	12	42665101	42665400	*	1.68958e-10	7.7203e-08	16.1652		gpr19		ENSDARG00000008660	ENSDART00000021559
30804	12	43202701	43203000	*	1.52136e-11	8.48832e-09	-10.5671		greb1		ENSDARG00000089616	ENSDART00000150575
30810	12	43271401	43271700	*	0.000196976	0.00766566	10.9123		grid2		ENSDARG00000089616	ENSDART00000157475
31135	12	49188301	49188600	*	8.12124e-07	0.000108978	-12.6666		grik4		ENSDARG00000089616	ENSDART00000129961
31157	13	237901	238200	*	0.000123858	0.0054167	10.0403		grnb		ENSDARG00000089616	ENSDART00000171068
31210	13	791101	791400	*	3.0418e-05	0.00189236	10.7633		gsc		ENSDARG00000045442	ENSDART00000121576
31296	13	1798801	1799100	*	9.41639e-11	4.42698e-08	-16.8449		gsg1l		ENSDARG00000045442	ENSDART00000066833
31379	13	2955001	2955300	*	5.15096e-07	7.62638e-05	16.4486		gtf2f1		ENSDARG00000045442	ENSDART00000169128
31437	13	3526801	3527100	*	2.19845e-05	0.00149587	-16.662		gtpbp1l		ENSDARG00000045932	ENSDART00000104755
31592	13	5706901	5707200	*	8.70935e-06	0.000721287	-15.2945		gxylt2		ENSDARG00000045932	ENSDART00000158463
31759	13	8985901	8986200	*	2.59296e-08	6.63956e-06	11.8077		gyltl1b		ENSDARG00000045932	ENSDART00000164113
31760	13	8986201	8986500	*	3.88578e-15	4.9039e-12	12.4018		hamp1		ENSDARG00000020028	ENSDART00000004742
31892	13	11903401	11903700	*	8.79846e-08	1.77999e-05	-15.5787		hao2		ENSDARG00000020028	ENSDART00000164407
31954	13	13440601	13440900	*	4.55191e-15	5.48346e-12	22.359		hapln1a		ENSDARG00000104049	ENSDART00000164855
32081	13	15926101	15926400	*	3.8079e-06	0.000382265	-13.1561		hapln3		ENSDARG00000104049	ENSDART00000172255
32250	13	19407901	19408200	*	4.89426e-08	1.10862e-05	-12.5742		has2		ENSDARG00000077275	ENSDART00000138227
32295	13	21075001	21075300	*	4.63012e-06	0.000447842	11.7541		hat1		ENSDARG00000077275	ENSDART00000113859
32330	13	22339801	22340100	*	2.44903e-06	0.000269314	-15.4266		hcn4		ENSDARG00000038000	ENSDART00000055385
32411	13	24951301	24951600	*	3.93664e-05	0.0023262	-17.0284		hddc2		ENSDARG00000018797	ENSDART00000101944
32445	13	25894501	25894800	*	0.0001233	0.00540122	-10.7008		hel_dr4		ENSDARG00000034056	ENSDART00000138794
32458	13	26180101	26180400	*	6.41567e-07	9.04414e-05	20.1292		helt		ENSDARG00000034056	ENSDART00000021683
32603	13	29649301	29649600	*	2.83114e-05	0.00180803	10.4379		hey1		ENSDARG00000034056	ENSDART00000100328
32686	13	32329801	32330100	*	3.94309e-06	0.000394342	-13.0296		hey2		ENSDARG00000038429	ENSDART00000109107
32894	13	38269501	38269800	*	1.14688e-07	2.18669e-05	18.5156		hic1		ENSDARG00000038429	ENSDART00000133889
32905	13	38585401	38585700	*	1.2238e-12	9.979e-10	14.6983		hk2		ENSDARG00000038429	ENSDART00000135405
32907	13	38613601	38613900	*	0.000191272	0.00749693	-10.7317		hnf4g		ENSDARG00000038429	ENSDART00000056082
32921	13	39004201	39004500	*	4.61162e-05	0.00262271	13.8137		hnmt		ENSDARG00000038429	ENSDART00000158952
33423	13	48535801	48536100	*	9.22036e-06	0.000751878	13.3568		hoxb1b		ENSDARG00000011777	ENSDART00000008696
33585	13	50813401	50813700	*	1.60661e-09	5.5297e-07	12.979		hs3st2		ENSDARG00000011777	ENSDART00000017053
33841	14	2396101	2396400	*	6.92112e-07	9.55341e-05	13.7775		hs6st1b		ENSDARG00000011777	ENSDART00000058468
33843	14	2450701	2451000	*	2.2424e-07	3.92269e-05	15.1892		hsd3b1		ENSDARG00000011777	ENSDART00000161117
33923	14	3531901	3532200	*	0.000117133	0.00519545	-12.6431		hspb1		ENSDARG00000039365	ENSDART00000131609
34014	14	4966201	4966500	*	0.000284348	0.00993521	10.6739		ids		ENSDARG00000039365	ENSDART00000135265
34017	14	4982101	4982400	*	1.11022e-16	1.73079e-13	16.1796		ighz		ENSDARG00000039365	ENSDART00000123482
34677	14	13850101	13850400	*	0	0	10.3324		ikzf1		ENSDARG00000039365	ENSDART00000057528
34750	14	15011701	15012000	*	3.8053e-05	0.00226055	10.9414		im:6904045		ENSDARG00000007691	ENSDART00000134947
34974	14	19991101	19991400	*	4.08728e-06	0.000406463	-11.2061		im:7140055		ENSDARG00000007691	ENSDART00000141679
34978	14	20123101	20123400	*	0.000219647	0.00830406	-13.7772		im:7143923		ENSDARG00000007691	ENSDART00000024691
35040	14	21968401	21968700	*	0.000121982	0.00537009	-12.2106		im:7151068		ENSDARG00000007691	ENSDART00000122757
35115	14	24138301	24138600	*	1.18648e-06	0.000150092	-11.7792		im:7154842		ENSDARG00000086345	ENSDART00000135006
35152	14	25602001	25602300	*	1.66562e-06	0.000197265	-15.5848		immp1l		ENSDARG00000086345	ENSDART00000134378
35173	14	26413201	26413500	*	9.50275e-05	0.00451443	-17.1985		ing4		ENSDARG00000086345	ENSDART00000142846
35191	14	26923501	26923800	*	0	0	26.6093		inhbaa		ENSDARG00000070357	ENSDART00000103155
35341	14	32274301	32274600	*	0.00020599	0.00790616	-10.0711		inpp5k		ENSDARG00000056627	ENSDART00000125923
35351	14	32632801	32633100	*	6.30935e-05	0.0033409	10.6059		ints2		ENSDARG00000041959	ENSDART00000061499
35423	14	34935901	34936200	*	1.36963e-06	0.00016883	19.4689		irak1bp1		ENSDARG00000095577	ENSDART00000102876
35458	14	35794801	35795100	*	5.55405e-07	8.04344e-05	20.976		irf2bp2b		ENSDARG00000095577	ENSDART00000136599
35542	14	38593501	38593800	*	3.71836e-08	8.87793e-06	-21.0194		irx1a	unnamed	ENSDARG00000095577	ENSDART00000076012
35559	14	39114901	39115200	*	0.000105534	0.00484686	-13.9248		irx2a		ENSDARG00000004964	ENSDART00000131949
35571	14	39370801	39371100	*	5.959e-05	0.00320014	11.462		irx3b		ENSDARG00000004964	ENSDART00000076955
35577	14	39521701	39522000	*	0.000191083	0.00749688	10.7469		irx5a		ENSDARG00000004964	ENSDART00000138614
35864	14	45546301	45546600	*	8.85768e-10	3.30632e-07	12.5619		irx6a		ENSDARG00000004964	ENSDART00000013654
36010	14	48016201	48016500	*	0.000168759	0.00684719	11.1363		isl2a		ENSDARG00000060093	ENSDART00000124059
36125	14	50321701	50322000	*	3.75457e-07	5.99425e-05	-11.094		itga11b		ENSDARG00000060093	ENSDART00000136642
36165	14	50903401	50903700	*	5.00125e-05	0.00279041	14.1332		jkamp		ENSDARG00000069113	ENSDART00000100310
36200	14	51316501	51316800	*	2.77354e-06	0.000298801	16.8887		kat6b		ENSDARG00000069113	ENSDART00000133115
36214	14	51549901	51550200	*	0.00023059	0.0085831	-10.8892		kcnd2		ENSDARG00000069113	ENSDART00000138222
36576	15	4298701	4299000	*	1.98117e-06	0.00022583	12.3147		kcnip3b		ENSDARG00000056923	ENSDART00000079502
36636	15	5106301	5106600	*	8.40466e-05	0.00412692	-13.9394		kcnj8		ENSDARG00000044807	ENSDART00000098499
36651	15	5318401	5318700	*	6.95719e-05	0.00360793	-10.7376		kcnk5a		ENSDARG00000074431	ENSDART00000111161
36779	15	8343301	8343600	*	2.40918e-14	2.56572e-11	19.6908		kctd5		ENSDARG00000103083	ENSDART00000169773
36780	15	8343601	8343900	*	0	0	22.8585		kdrl		ENSDARG00000091831	ENSDART00000128065
36868	15	10299601	10299900	*	0.000210151	0.00803677	-18.27		kiaa0586		ENSDARG00000033871	ENSDART00000043251
36887	15	10850101	10850400	*	0.000115733	0.00516359	-10.4889		kif1b		ENSDARG00000033871	ENSDART00000171400
37016	15	12853201	12853500	*	1.61593e-12	1.24133e-09	-27.2751		kirrel3l		ENSDARG00000033871	ENSDART00000171115
37024	15	13160101	13160400	*	0.000276089	0.00970421	15.4924		klf13		ENSDARG00000028336	ENSDART00000032392
37062	15	14313601	14313900	*	0	0	-24.6383		klf7b		ENSDARG00000046090	ENSDART00000140537
37168	15	16430701	16431000	*	1.24256e-12	9.979e-10	-13.9826		kmt2bb		ENSDARG00000041137	ENSDART00000060304
37263	15	18665401	18665700	*	2.28919e-06	0.000255447	12.81		lbx2		ENSDARG00000041137	ENSDART00000152620
37264	15	18665701	18666000	*	0	0	17.9335		ldb3a		ENSDARG00000104172	ENSDART00000163066
37300	15	19613701	19614000	*	4.00982e-07	6.28812e-05	-13.1261		lfng		ENSDARG00000104172	ENSDART00000162266
37310	15	19862401	19862700	*	0	0	11.8906		lgals3l		ENSDARG00000104172	ENSDART00000167213
37397	15	21806701	21807000	*	8.08242e-14	8.23856e-11	-17.0566		lhfpl2a		ENSDARG00000104172	ENSDART00000164119
37443	15	23086801	23087100	*	7.12615e-06	0.000624757	-10.8588		lhx1a		ENSDARG00000076060	ENSDART00000147443
37521	15	25731001	25731300	*	3.80848e-05	0.00226055	-10.4891		lhx8a		ENSDARG00000076060	ENSDART00000103298
37542	15	26465401	26465700	*	2.32107e-07	4.04695e-05	-15.0175		lingo1a		ENSDARG00000021895	ENSDART00000148922
37563	15	27033601	27033900	*	6.45276e-05	0.00340324	-10.5172		lmbrd1		ENSDARG00000021895	ENSDART00000121745
37608	15	28043701	28044000	*	1.67628e-07	3.05328e-05	-16.5498		lmo1		ENSDARG00000021895	ENSDART00000030939
37612	15	28154101	28154400	*	7.04892e-05	0.00363095	13.6837		lmo4b		ENSDARG00000021895	ENSDART00000168707
37671	15	30100501	30100800	*	1.56709e-05	0.0011559	10.4318		lmx1bb		ENSDARG00000010791	ENSDART00000012104
37707	15	30764701	30765000	*	0.000150666	0.00629809	-15.1367		lpar1		ENSDARG00000010791	ENSDART00000126339
37708	15	30771901	30772200	*	8.54478e-07	0.000113797	14.9063		lppr4b		ENSDARG00000010791	ENSDART00000006180
37728	15	31140301	31140600	*	5.87364e-07	8.38413e-05	-18.7294		lrmp		ENSDARG00000037415	ENSDART00000142971
37944	15	36921001	36921300	*	8.52973e-05	0.00415546	-10.2323		lrp2bp		ENSDARG00000037415	ENSDART00000054452
37969	15	37519501	37519800	*	2.24602e-05	0.00152432	-17.2455		lrrc3		ENSDARG00000037415	ENSDART00000163819
38009	15	38571301	38571600	*	1.39232e-06	0.000170832	10.7194		lrrc30		ENSDARG00000055459	ENSDART00000103151
38565	15	47644501	47644800	*	3.62577e-12	2.46387e-09	14.6732		lrrtm4l1		ENSDARG00000055459	ENSDART00000164035
38634	16	665101	665400	*	0	0	-31.2069		lrrtm4l2		ENSDARG00000025703	ENSDART00000170452
38635	16	665401	665700	*	1.28361e-06	0.000160465	-14.6845		luzp2		ENSDARG00000025703	ENSDART00000007672
38636	16	672001	672300	*	7.91674e-06	0.000669256	-12.8219		maf		ENSDARG00000010745	ENSDART00000018735
38645	16	775801	776100	*	0	0	10.7453		mafba		ENSDARG00000044420	ENSDART00000065239
38672	16	1102201	1102500	*	3.63259e-05	0.0021722	-10.8753		map1lc3c		ENSDARG00000070916	ENSDART00000154580
38721	16	1767901	1768200	*	6.57734e-09	2.07517e-06	17.3028		mapk13		ENSDARG00000070916	ENSDART00000123114
38952	16	4804201	4804500	*	6.44044e-08	1.3765e-05	20.5151		mbd3a		ENSDARG00000034042	ENSDART00000043651
39155	16	8150701	8151000	*	3.19496e-05	0.00196459	11.0191		mbtps1		ENSDARG00000038540	ENSDART00000056245
39457	16	15707701	15708000	*	1.29334e-06	0.000161301	13.6793		mcf2a		ENSDARG00000099093	ENSDART00000169481
40068	16	29481301	29481600	*	5.28947e-07	7.76637e-05	-11.1723		med27		ENSDARG00000099093	ENSDART00000162888
40457	16	40378501	40378800	*	6.22061e-05	0.00331045	13.0439		med8		ENSDARG00000003564	ENSDART00000018515
40604	16	43983601	43983900	*	7.42203e-05	0.00377544	15.3799		mef2ca		ENSDARG00000099927	ENSDART00000171642
40612	16	44074801	44075100	*	1.50811e-06	0.000182088	-13.7563		mef2cb		ENSDARG00000099927	ENSDART00000164028
40807	16	47996401	47996700	*	2.26263e-13	2.10225e-10	20.1925		megf8		ENSDARG00000099927	ENSDART00000160675
40986	16	50728801	50729100	*	0.000165985	0.00677285	-12.2401		meis1		ENSDARG00000057973	ENSDART00000140214
41211	16	53846701	53847000	*	1.4958e-12	1.16595e-09	15.2226		meis2a		ENSDARG00000057973	ENSDART00000152243
41562	17	3084301	3084600	*	1.9185e-07	3.4471e-05	-14.173		mettl21d		ENSDARG00000010267	ENSDART00000100133
41715	17	4869301	4869600	*	2.7727e-10	1.20464e-07	-10.7436		micall2a		ENSDARG00000010267	ENSDART00000124724
41722	17	4970401	4970700	*	1.83221e-07	3.30325e-05	-11.2752		mmp11a		ENSDARG00000035820	ENSDART00000051974
41775	17	5602501	5602800	*	1.08127e-05	0.000857965	-15.1599		mmp16a		ENSDARG00000035820	ENSDART00000133699
41808	17	6069001	6069300	*	4.12992e-12	2.70252e-09	10.5682		mnx2b		ENSDARG00000039345	ENSDART00000057500
41858	17	7131901	7132200	*	4.85321e-09	1.57817e-06	-17.6384		mob2b		ENSDARG00000078386	ENSDART00000160567
41898	17	7783201	7783500	*	4.5796e-07	7.03436e-05	-17.2316		mppe1		ENSDARG00000078386	ENSDART00000161216
41987	17	9452101	9452400	*	6.50006e-07	9.11462e-05	11.3923		mrps23		ENSDARG00000078386	ENSDART00000164878
41991	17	9550201	9550500	*	3.28681e-05	0.00200679	-15.1376		msi2b		ENSDARG00000078386	ENSDART00000007756
42026	17	9995701	9996000	*	1.67986e-08	4.61347e-06	23.3601		mtnr1bb		ENSDARG00000098317	ENSDART00000163359
42027	17	9996001	9996300	*	7.62305e-08	1.59706e-05	12.1899		musk		ENSDARG00000098317	ENSDART00000167951
42064	17	10768201	10768500	*	7.37621e-06	0.000637802	-10.898		mvk		ENSDARG00000098317	ENSDART00000168667
42112	17	11724001	11724300	*	1.71218e-06	0.000200781	-18.3707		mxf		ENSDARG00000099849	ENSDART00000164974
42179	17	13763401	13763700	*	6.01122e-05	0.00321231	-16.6905		mycb		ENSDARG00000099849	ENSDART00000172171
42183	17	13902001	13902300	*	1.0293e-05	0.000822888	-14.7053		mycbp2		ENSDARG00000099849	ENSDART00000163465
42275	17	16707301	16707600	*	9.00635e-07	0.000118456	-13.7791		mycn		ENSDARG00000099849	ENSDART00000170631
42336	17	18149701	18150000	*	4.09306e-12	2.70252e-09	19.8595		myl2b		ENSDARG00000099088	ENSDART00000172063
42373	17	19316101	19316400	*	8.07996e-11	3.8934e-08	11.545		myo16		ENSDARG00000093413	ENSDART00000133240
42503	17	24182701	24183000	*	2.02256e-11	1.08288e-08	24.2236		myog		ENSDARG00000093413	ENSDART00000168038
42688	17	29822101	29822400	*	1.72065e-09	5.88402e-07	14.6266		myt1b		ENSDARG00000074323	ENSDART00000155660
42697	17	30052501	30052800	*	1.41879e-08	3.96672e-06	-11.2888		naa50		ENSDARG00000074323	ENSDART00000113669
42816	17	33276601	33276900	*	8.9873e-08	1.81128e-05	-17.9936		nab1a		ENSDARG00000042277	ENSDART00000062003
42817	17	33276901	33277200	*	7.45047e-11	3.65656e-08	-16.5636		nap1l4a		ENSDARG00000032553	ENSDART00000149640
42828	17	33585001	33585300	*	2.95564e-09	9.91535e-07	16.8061		napgl		ENSDARG00000032553	ENSDART00000150063
42987	17	38382601	38382900	*	3.21946e-06	0.000338583	10.8586		ncam1a		ENSDARG00000012688	ENSDART00000132874
43015	17	39501601	39501900	*	3.2844e-06	0.00034337	-10.6968		ncam1b		ENSDARG00000012688	ENSDART00000151582
43072	17	41058901	41059200	*	0.00021785	0.0082597	-10.6383		ncana		ENSDARG00000012688	ENSDART00000151383
43173	17	43134301	43134600	*	8.93127e-07	0.000118054	-11.4924		ncoa2		ENSDARG00000091402	ENSDART00000011192
43249	17	45609301	45609600	*	1.89634e-08	5.07649e-06	-15.0673		ndrg4		ENSDARG00000091402	ENSDART00000170885
43377	17	48567601	48567900	*	2.97177e-05	0.00186853	-10.052		ndst3		ENSDARG00000018106	ENSDART00000020786
43587	17	51375601	51375900	*	8.30247e-05	0.00410129	-10.3299		necab2		ENSDARG00000018106	ENSDART00000132274
43660	17	52253101	52253400	*	4.22425e-06	0.000417166	-11.4562		nek7		ENSDARG00000053047	ENSDART00000075009
43671	17	52362301	52362600	*	9.21544e-06	0.000751878	10.4611		net1		ENSDARG00000036116	ENSDART00000162861
43711	17	52623901	52624200	*	6.54769e-06	0.000580363	18.2236		neurl1b		ENSDARG00000036116	ENSDART00000172732
43788	18	62701	63000	*	2.16341e-05	0.00148153	11.9472		neurod6a		ENSDARG00000036116	ENSDART00000158906
43800	18	272101	272400	*	7.80003e-10	2.99592e-07	13.8589		nfia		ENSDARG00000036116	ENSDART00000052434
43819	18	503101	503400	*	3.06541e-05	0.00190036	10.8804		nfil3-6		ENSDARG00000014565	ENSDART00000017881
43875	18	1236001	1236300	*	0.000150457	0.00629434	-10.3032		nfixb		ENSDARG00000039701	ENSDART00000058036
43903	18	1542601	1542900	*	3.75477e-12	2.51924e-09	22.2368		nfkb1		ENSDARG00000039007	ENSDART00000145905
44213	18	6936601	6936900	*	5.15816e-10	2.08707e-07	-17.7833		ngf		ENSDARG00000039007	ENSDART00000145902
44233	18	7345501	7345800	*	1.42926e-05	0.00107305	-15.8231		nkx2.1b		ENSDARG00000039007	ENSDART00000135298
44459	18	13814401	13814700	*	0.000106901	0.00487293	10.295		nlgn1		ENSDARG00000039007	ENSDART00000132361
44575	18	17795701	17796000	*	1.7195e-08	4.67391e-06	-20.184		nlgn3a		ENSDARG00000039007	ENSDART00000135824
44578	18	17831701	17832000	*	2.15018e-05	0.00147629	13.263		nme4		ENSDARG00000038359	ENSDART00000134042
44604	18	18804001	18804300	*	0	0	19.8492		nog2		ENSDARG00000038359	ENSDART00000135068
44685	18	21352201	21352500	*	0	0	21.2571		nop16		ENSDARG00000038359	ENSDART00000055956
44690	18	21481201	21481500	*	2.37111e-06	0.000261833	11.9431		npc2		ENSDARG00000038359	ENSDART00000098412
44832	18	25743901	25744200	*	6.36887e-07	9.00211e-05	-10.8914		npffr1l2		ENSDARG00000040087	ENSDART00000123842
44929	18	28504801	28505100	*	9.50807e-06	0.000769421	-25.5955		nphs1		ENSDARG00000040087	ENSDART00000058627
44930	18	28505101	28505400	*	0	0	-14.7328		npnt		ENSDARG00000040087	ENSDART00000164868
44998	18	29950501	29950800	*	5.30777e-08	1.18208e-05	15.6867		nr2f1a		ENSDARG00000059044	ENSDART00000136436
45081	18	31478101	31478400	*	7.97813e-07	0.000108153	11.9969		nrg1		ENSDARG00000059044	ENSDART00000160184
45298	18	33592501	33592800	*	4.16672e-07	6.51489e-05	11.9339		nrp1a		ENSDARG00000090834	ENSDART00000143904
45390	18	36335401	36335700	*	2.89533e-05	0.00183352	12.361		nrxn2a		ENSDARG00000090834	ENSDART00000161710
45394	18	36466201	36466500	*	0.000104792	0.00482159	-12.2883		ntf3		ENSDARG00000060494	ENSDART00000154357
45444	18	37515901	37516200	*	0.000186517	0.00737228	11.0496		ntpcr		ENSDARG00000060494	ENSDART00000075743
45476	18	38290201	38290500	*	9.00391e-14	9.00468e-11	-12.269		ntrk2a		ENSDARG00000089536	ENSDART00000163635
45593	18	41375101	41375400	*	4.73179e-05	0.00267384	-11.9155		nufip2		ENSDARG00000089536	ENSDART00000126766
45604	18	41568001	41568300	*	4.58886e-08	1.05295e-05	13.5499		nup98		ENSDARG00000032866	ENSDART00000101974
45671	18	43156201	43156500	*	9.85842e-05	0.00462017	-14.7569		nxnl2		ENSDARG00000004861	ENSDART00000009104
45799	18	45242101	45242400	*	0.000197453	0.00767296	11.2332		odz4		ENSDARG00000004861	ENSDART00000126966
45944	18	47407801	47408100	*	3.55247e-06	0.000360033	12.8239		opn4a		ENSDARG00000019420	ENSDART00000017726
46071	18	49497901	49498200	*	1.32098e-07	2.46542e-05	-13.0594		oprk1		ENSDARG00000019420	ENSDART00000143208
46146	18	50699401	50699700	*	5.01531e-08	1.13121e-05	-20.8075		oprl1		ENSDARG00000089434	ENSDART00000122240
46157	18	50793301	50793600	*	1.77103e-05	0.00126855	10.2341		or101-1		ENSDARG00000014582	ENSDART00000139686
46506	19	5238901	5239200	*	7.541e-05	0.00381036	20.4343		or120-1		ENSDARG00000014582	ENSDART00000009347
46528	19	5590801	5591100	*	0.000157868	0.00652198	-11.7114		or129-1		ENSDARG00000014582	ENSDART00000145309
46589	19	6755401	6755700	*	7.10235e-06	0.000624757	22.3009		osgn1		ENSDARG00000025091	ENSDART00000078893
46651	19	8051401	8051700	*	3.30734e-07	5.42737e-05	-15.6812		ostf1		ENSDARG00000025091	ENSDART00000125218
46712	19	9650101	9650400	*	1.01089e-05	0.000811398	11.5623		otx1a		ENSDARG00000025091	ENSDART00000152499
46970	19	15759601	15759900	*	5.35566e-05	0.00293866	-12.3094		otx1b		ENSDARG00000101762	ENSDART00000166064
47179	19	19421401	19421700	*	0.000205064	0.00789397	-10.8535		oxr1a		ENSDARG00000020814	ENSDART00000012023
47387	19	24722401	24722700	*	1.78735e-12	1.33433e-09	27.8784		p2rx8		ENSDARG00000013863	ENSDART00000135648
47660	19	32281801	32282100	*	1.67683e-06	0.00019751	17.0145		pa2g4b		ENSDARG00000013863	ENSDART00000089547
47724	19	33906301	33906600	*	9.10904e-10	3.37637e-07	-23.1728		palmda		ENSDARG00000013863	ENSDART00000140857
47846	19	37632901	37633200	*	3.53195e-05	0.00212738	-11.6261		palmdb		ENSDARG00000013863	ENSDART00000136716
47975	19	40771501	40771800	*	7.53539e-05	0.00381036	14.4306		pam16		ENSDARG00000013863	ENSDART00000147391
48184	19	44677501	44677800	*	9.79258e-07	0.000127531	-19.5668		paqr3a		ENSDARG00000067665	ENSDART00000097455
48192	19	44724001	44724300	*	0	0	-10.0944		park2		ENSDARG00000067665	ENSDART00000159901
48197	19	44775301	44775600	*	0.00020379	0.00786917	-13.346		park7		ENSDARG00000052697	ENSDART00000135954
48283	19	46344901	46345200	*	0	0	18.6637		pax2a		ENSDARG00000052697	ENSDART00000074599
49141	20	11058901	11059200	*	1.13809e-12	9.45044e-10	21.5847		pax7a		ENSDARG00000039699	ENSDART00000137057
49340	20	13656301	13656600	*	0	0	-19.5432		pax8		ENSDARG00000039699	ENSDART00000058032
49496	20	17070001	17070300	*	3.00232e-06	0.000318911	10.9976		pbx1a		ENSDARG00000039699	ENSDART00000168771
49630	20	20679601	20679900	*	6.48453e-07	9.11462e-05	17.1817		pcbp3		ENSDARG00000090797	ENSDART00000131924
49714	20	23043601	23043900	*	0	0	20.0261		pcdh15b		ENSDARG00000020929	ENSDART00000039717
49860	20	28797901	28798200	*	5.98155e-05	0.00320576	14.3385		pcdh19		ENSDARG00000020929	ENSDART00000141418
49941	20	32127601	32127900	*	0.000281454	0.0098601	15.4826		pcdh1a		ENSDARG00000020929	ENSDART00000145648
49984	20	33548701	33549000	*	0.000234349	0.00867426	12.948		pcdh1g2		ENSDARG00000020929	ENSDART00000133591
50151	20	39735601	39735900	*	4.94477e-06	0.000472244	-21.3664		pcdh2aa1		ENSDARG00000020929	ENSDART00000146452
50275	20	43514701	43515000	*	1.12612e-06	0.00014383	-13.0376		pcdh2aa3		ENSDARG00000020929	ENSDART00000145704
50345	20	45495301	45495600	*	9.32935e-05	0.00445179	11.4501		pcdh2ab1		ENSDARG00000020929	ENSDART00000159843
50372	20	45922801	45923100	*	7.63712e-06	0.000653961	15.0342		pcnxl3		ENSDARG00000020929	ENSDART00000056621
50644	20	51041701	51042000	*	6.24054e-09	1.9807e-06	-23.4319		pcsk2		ENSDARG00000055232	ENSDART00000135964
50925	21	118201	118500	*	1.29277e-08	3.68401e-06	-15.1072		pdcd10b		ENSDARG00000055232	ENSDART00000133717
51021	21	1418401	1418700	*	1.50324e-05	0.00112065	-12.9058		pdcd4b		ENSDARG00000055232	ENSDART00000099027
51162	21	2696401	2696700	*	2.31307e-05	0.00156382	-11.4976		pdgfrb		ENSDARG00000055232	ENSDART00000077554
51354	21	5546401	5546700	*	3.04046e-11	1.56464e-08	19.2068		pdhx		ENSDARG00000007885	ENSDART00000020946
51369	21	5677501	5677800	*	8.66875e-06	0.000721287	10.5584		pdzrn3b		ENSDARG00000007885	ENSDART00000142483
52040	21	23521501	23521800	*	0.000154622	0.00641791	12.094		pfkpa		ENSDARG00000007885	ENSDART00000131283
52142	21	25894801	25895100	*	3.06722e-06	0.000325153	-11.7378		pgam5		ENSDARG00000034497	ENSDART00000109520
52218	21	27843301	27843600	*	1.29429e-07	2.42414e-05	-14.383		pgm2l1		ENSDARG00000045801	ENSDART00000067322
52235	21	28363201	28363500	*	0.000261107	0.00935922	10.6219		phlda2		ENSDARG00000069662	ENSDART00000144375
52322	21	31012501	31012800	*	1.11022e-16	1.73079e-13	16.0654		pi15a		ENSDARG00000069662	ENSDART00000137535
52323	21	31012801	31013100	*	1.5379e-08	4.26783e-06	12.4415		picalml		ENSDARG00000069662	ENSDART00000101530
52603	21	36918301	36918600	*	2.5463e-09	8.59652e-07	-11.5996		pigo		ENSDARG00000088048	ENSDART00000170629
52617	21	37131601	37131900	*	7.33799e-06	0.000636447	11.8371		pim3		ENSDARG00000088048	ENSDART00000123063
52669	21	37977901	37978200	*	2.66025e-08	6.7791e-06	-19.0016		pitpnab		ENSDARG00000004782	ENSDART00000156968
52786	21	40324501	40324800	*	1.28773e-08	3.68401e-06	13.1706		pitpnb		ENSDARG00000004782	ENSDART00000125883
53707	22	7347601	7347900	*	2.00744e-06	0.000227711	13.7978		pitx2		ENSDARG00000004782	ENSDART00000013534
53717	22	7761601	7761900	*	7.60072e-05	0.00383323	-16.5813		plek		ENSDARG00000078195	ENSDART00000110845
53933	22	12843001	12843300	*	6.66418e-07	9.29557e-05	-13.1332		plk2a		ENSDARG00000018820	ENSDART00000134286
53976	22	13711801	13712100	*	2.72876e-06	0.000296387	14.9511		plk4		ENSDARG00000018820	ENSDART00000026492
54010	22	14826601	14826900	*	4.54679e-08	1.05141e-05	15.7615		plod2		ENSDARG00000004830	ENSDART00000003947
54082	22	16839901	16840200	*	0.000222372	0.00837363	-13.3647		plxdc1		ENSDARG00000004830	ENSDART00000148852
54096	22	17025001	17025300	*	0.000144579	0.00611111	-15.6541		plxnb1a		ENSDARG00000004830	ENSDART00000149413
54360	22	23111401	23111700	*	4.15773e-05	0.00242036	-17.7722		plxnb2b		ENSDARG00000004830	ENSDART00000161586
54602	22	29707501	29707800	*	2.94527e-06	0.000313479	-13.4579		pnn		ENSDARG00000004830	ENSDART00000165876
54820	22	33697201	33697500	*	5.5135e-06	0.000512703	-17.6		pnp6		ENSDARG00000069774	ENSDART00000101157
55013	22	36284101	36284400	*	1.8098e-05	0.00129109	-11.9257		polr2b		ENSDARG00000069774	ENSDART00000101789
55052	22	36850201	36850500	*	4.34725e-05	0.00250581	-10.653		polr2gl		ENSDARG00000055713	ENSDART00000151144
55112	22	37489201	37489500	*	1.18287e-08	3.44491e-06	15.778		pomca		ENSDARG00000004372	ENSDART00000147440
55318	23	1388401	1388700	*	2.38525e-05	0.0015996	10.3774		pomgnt1		ENSDARG00000004372	ENSDART00000144554
55343	23	1791001	1791300	*	1.88209e-05	0.00133547	-14.4906		pop4		ENSDARG00000004372	ENSDART00000109023
55496	23	3486301	3486600	*	6.05536e-06	0.000547574	16.6005		pou3f3b		ENSDARG00000037433	ENSDART00000123434
55636	23	5222401	5222700	*	0.000115533	0.00515905	11.6855		pou4f1		ENSDARG00000037433	ENSDART00000054476
55781	23	7872601	7872900	*	2.19607e-05	0.00149587	16.2996		ppapdc1a		ENSDARG00000037433	ENSDART00000054473
55793	23	7968301	7968600	*	1.84289e-05	0.00131293	-16.6747		ppfia4		ENSDARG00000091481	ENSDART00000122732
55796	23	8049301	8049600	*	6.98035e-07	9.59167e-05	-15.0637		ppil2		ENSDARG00000032705	ENSDART00000013642
55802	23	8115301	8115600	*	8.96832e-05	0.00432147	-12.0413		ppm1ab		ENSDARG00000104566	ENSDART00000159423
55911	23	10155601	10155900	*	0.000180081	0.00719302	-13.2105		ppp1cbl		ENSDARG00000069715	ENSDART00000101673
55936	23	10680601	10680900	*	1.5724e-05	0.00115756	-11.346		ppp2r1b		ENSDARG00000012833	ENSDART00000151904
56015	23	12678601	12678900	*	1.93336e-07	3.4504e-05	-10.1518		ppp2r2a		ENSDARG00000012833	ENSDART00000136874
56016	23	12679501	12679800	*	0	0	-17.4375		pprc1		ENSDARG00000012833	ENSDART00000015729
56038	23	12931501	12931800	*	0	0	-10.7613		prcp		ENSDARG00000004843	ENSDART00000129022
56494	23	25397701	25398000	*	0	0	-30.7633		prdm14		ENSDARG00000004843	ENSDART00000104985
56586	23	28765501	28765800	*	2.44249e-15	3.23658e-12	-10.9625		prdm5		ENSDARG00000004843	ENSDART00000136509
56597	23	29176801	29177100	*	5.57634e-05	0.0030222	12.287		prkab1a		ENSDARG00000004843	ENSDART00000146526
56615	23	29542501	29542800	*	1.00444e-07	1.97185e-05	13.965		prkcbb		ENSDARG00000076120	ENSDART00000161485
56657	23	30603601	30603900	*	6.87929e-05	0.00358186	-18.3626		prkg1b		ENSDARG00000076120	ENSDART00000114288
56688	23	31302901	31303200	*	2.82799e-05	0.00180803	11.7801		prmt1		ENSDARG00000062402	ENSDART00000135604
56796	23	34436101	34436400	*	0.000104752	0.00482159	-12.6852		prox2		ENSDARG00000062402	ENSDART00000090217
57010	23	38932801	38933100	*	3.3088e-06	0.000345239	11.7469		prss12		ENSDARG00000062402	ENSDART00000170076
57412	23	44812201	44812500	*	4.43638e-06	0.000437078	16.6775		psma6b		ENSDARG00000059574	ENSDART00000082937
57581	24	963601	963900	*	0.000186136	0.00736271	-11.9776		psmd6		ENSDARG00000040198	ENSDART00000135479
57649	24	2171101	2171400	*	1.01186e-05	0.000811398	-14.9087		psme3		ENSDARG00000040198	ENSDART00000164851
57687	24	3203701	3204000	*	8.66246e-06	0.000721287	-10.7566		ptbp2a		ENSDARG00000040198	ENSDART00000159608
57710	24	3759601	3759900	*	5.43151e-05	0.00296188	-10.5941		ptbp3		ENSDARG00000040198	ENSDART00000058796
57715	24	3853501	3853800	*	1.10913e-10	5.11206e-08	-23.6319		ptch2		ENSDARG00000003909	ENSDART00000100524
57738	24	4424101	4424400	*	3.4673e-06	0.000354792	21.7309		pth2		ENSDARG00000060004	ENSDART00000084055
57771	24	5041801	5042100	*	0.000163617	0.00669171	13.8315		pthlha		ENSDARG00000045444	ENSDART00000066835
57959	24	8853901	8854200	*	5.90566e-08	1.27247e-05	13.1113		ptk2ba		ENSDARG00000017741	ENSDART00000139855
57978	24	9097801	9098100	*	8.25594e-08	1.69613e-05	-12.4464		ptprc		ENSDARG00000017741	ENSDART00000018651
58067	24	11798101	11798400	*	1.96509e-05	0.00137776	-11.0125		ptprea		ENSDARG00000017741	ENSDART00000142340
58176	24	14180101	14180400	*	0.000237675	0.00875459	16.344		ptprfb		ENSDARG00000017741	ENSDART00000145850
58203	24	14682301	14682600	*	3.32304e-09	1.10085e-06	-13.7271		ptprga		ENSDARG00000017741	ENSDART00000143518
58316	24	17288401	17288700	*	6.34e-10	2.50783e-07	10.9964		ptprmb		ENSDARG00000017741	ENSDART00000147991
58388	24	19476301	19476600	*	1.90073e-05	0.00134151	-13.1265		ptpro		ENSDARG00000079586	ENSDART00000114750
58436	24	21042301	21042600	*	9.78101e-05	0.00459608	-15.2128		pvrl1b		ENSDARG00000079586	ENSDART00000148259
58444	24	21204601	21204900	*	3.17952e-06	0.000335715	-14.4428		pvrl2l		ENSDARG00000079586	ENSDART00000170532
58511	24	23185801	23186100	*	7.14252e-06	0.000624757	13.2626		qdpra		ENSDARG00000039338	ENSDART00000133850
58579	24	24924601	24924900	*	0.000227921	0.00850764	12.4554		qkib		ENSDARG00000016474	ENSDART00000028044
58642	24	27268801	27269100	*	0.000146493	0.00617726	12.5614		rab27a		ENSDARG00000090183	ENSDART00000113230
58671	24	28051201	28051500	*	8.12531e-09	2.47516e-06	12.8255		rab32a		ENSDARG00000090183	ENSDART00000161282
58732	24	29993401	29993700	*	5.32052e-12	3.35728e-09	10.7884		rabggtb		ENSDARG00000090183	ENSDART00000112854
58768	24	30645301	30645600	*	5.89558e-07	8.38413e-05	-12.0827		rac1		ENSDARG00000036239	ENSDART00000052641
58772	24	30748501	30748800	*	6.63025e-13	5.73757e-10	10.4875		rad21a		ENSDARG00000036239	ENSDART00000148821
58790	24	31135501	31135800	*	1.89393e-05	0.00134096	11.6507		rad21b		ENSDARG00000036239	ENSDART00000148950
58818	24	31626301	31626600	*	0	0	17.0372		raly		ENSDARG00000036239	ENSDART00000148373
58820	24	31661701	31662000	*	1.6673e-06	0.000197265	-10.3738		ranbp1		ENSDARG00000036239	ENSDART00000148453
58876	24	32558401	32558700	*	2.22045e-16	3.26927e-13	12.2111		rap2b		ENSDARG00000036239	ENSDART00000166522
59011	24	35548201	35548500	*	7.70058e-06	0.000656215	10.3044		rapgef1a		ENSDARG00000092718	ENSDART00000140766
59064	24	36396301	36396600	*	4.4726e-08	1.03977e-05	-13.2244		rasa1b		ENSDARG00000002933	ENSDART00000015333
59073	24	36478801	36479100	*	0.000144475	0.00611111	14.2022		rasgrp2		ENSDARG00000018329	ENSDART00000098648
59322	24	40861201	40861500	*	6.34348e-12	3.95569e-09	-16.0643		rbfox1		ENSDARG00000099732	ENSDART00000167916
59354	24	41461201	41461500	*	2.05298e-11	1.08817e-08	15.1213		rbks		ENSDARG00000099732	ENSDART00000165310
59505	25	1331401	1331700	*	1.37328e-05	0.00103895	-14.4935		rbm41		ENSDARG00000099732	ENSDART00000168955
59845	25	5441101	5441400	*	1.5454e-06	0.000186167	-13.4667		rc3h2		ENSDARG00000044015	ENSDART00000148013
59857	25	5624101	5624400	*	4.15447e-05	0.00242036	-11.4975		rcan1a		ENSDARG00000044015	ENSDART00000080430
59920	25	6703801	6704100	*	1.81498e-06	0.000210509	11.9003		rdh14a		ENSDARG00000005085	ENSDART00000150190
59932	25	6940201	6940500	*	8.46754e-06	0.0007068	-11.2304		recql		ENSDARG00000005085	ENSDART00000014098
60211	25	12986401	12986700	*	1.14109e-12	9.45044e-10	16.6354		rfx3		ENSDARG00000005085	ENSDART00000150176
60326	25	15485701	15486000	*	4.40644e-05	0.00253046	14.9459		rgs12a		ENSDARG00000036155	ENSDART00000139293
60451	25	19104601	19104900	*	3.88578e-15	4.9039e-12	-15.7795		rgs4		ENSDARG00000036155	ENSDART00000052499
60509	25	20971801	20972100	*	2.3711e-12	1.69837e-09	-14.5777		rgs6		ENSDARG00000069726	ENSDART00000142833
60590	25	23454901	23455200	*	2.35112e-12	1.69837e-09	-25.5425		rgs8		ENSDARG00000069726	ENSDART00000164871
60591	25	23455201	23455500	*	1.48053e-11	8.34837e-09	-26.7547		rhoga		ENSDARG00000010958	ENSDART00000014661
60859	25	29043601	29043900	*	1.43683e-06	0.000175481	10.0169		rhol		ENSDARG00000010958	ENSDART00000148925
61072	25	32244001	32244300	*	3.33721e-06	0.000347519	10.1678		rictora		ENSDARG00000010958	ENSDART00000149428
61087	25	32508001	32508300	*	4.98353e-07	7.39916e-05	-15.6525		riok3		ENSDARG00000012019	ENSDART00000136733
61105	25	32903401	32903700	*	1.60658e-06	0.000191362	-17.4371		rnd2		ENSDARG00000012019	ENSDART00000005499
61118	25	33009901	33010200	*	9.27213e-07	0.00012165	10.8586		rnf114		ENSDARG00000012019	ENSDART00000167603
61217	25	33969301	33969600	*	6.08367e-05	0.00324735	15.8295		rnf126		ENSDARG00000012019	ENSDART00000066197
61288	25	34866301	34866600	*	9.42901e-06	0.00076536	-19.1309		rnf168		ENSDARG00000012019	ENSDART00000047680
61402	25	36281701	36282000	*	1.33095e-07	2.47531e-05	25.3634		rnf220a		ENSDARG00000062812	ENSDART00000145156
61448	25	36865201	36865500	*	1.6113e-05	0.00117964	-16.1551		robo1		ENSDARG00000062812	ENSDART00000137280
61452	25	36872701	36873000	*	6.07603e-10	2.43983e-07	10.2938		rpl18a		ENSDARG00000099776	ENSDART00000170216
									rplp2		ENSDARG00000099776	ENSDART00000163822
									rps11		ENSDARG00000099776	ENSDART00000172148
									rps27.2		ENSDARG00000053326	ENSDART00000044411
									rraga		ENSDARG00000045415	ENSDART00000140924
									rras2		ENSDARG00000045415	ENSDART00000066782
									rs1		ENSDARG00000104372	ENSDART00000172465
									rspo3		ENSDARG00000104372	ENSDART00000163867
									rtn4r		ENSDARG00000056831	ENSDART00000163053
									rtn4rl1b		ENSDARG00000056831	ENSDART00000160812
									runx1t1		ENSDARG00000056831	ENSDART00000158244
									rxfp3.2a		ENSDARG00000056831	ENSDART00000079398
									s100b		ENSDARG00000056831	ENSDART00000165467
									s100v2		ENSDARG00000056831	ENSDART00000165880
									sall4		ENSDARG00000090585	ENSDART00000125971
									samm50l		ENSDARG00000062430	ENSDART00000144028
									sc:d411		ENSDARG00000062430	ENSDART00000140453
									scaper		ENSDARG00000062430	ENSDART00000090266
									scfd2		ENSDARG00000100851	ENSDART00000170854
									scn2b		ENSDARG00000100851	ENSDART00000167517
									scospondin		ENSDARG00000103826	ENSDART00000166345
									scrib		ENSDARG00000103826	ENSDART00000162513
									sec23a		ENSDARG00000102226	ENSDART00000171845
									sema3aa		ENSDARG00000070794	ENSDART00000139091
									sema3bl		ENSDARG00000070794	ENSDART00000076611
									sema3gb		ENSDARG00000070794	ENSDART00000131670
									sema4ab		ENSDARG00000070794	ENSDART00000104249
									sept7b		ENSDARG00000055302	ENSDART00000141634
									sepw1		ENSDARG00000055302	ENSDART00000077647
									serpina1		ENSDARG00000026753	ENSDART00000153872
									setd3		ENSDARG00000026753	ENSDART00000156760
									sh2d3ca		ENSDARG00000026753	ENSDART00000157144
									sh3gl1a		ENSDARG00000026753	ENSDART00000035812
									si:busm1-57f23.1		ENSDARG00000025081	ENSDART00000105686
									si:busm1-79m10.4		ENSDARG00000025081	ENSDART00000142264
									si:ch1073-112i17.1		ENSDARG00000059073	ENSDART00000138315
									si:ch1073-140o9.2		ENSDARG00000059073	ENSDART00000082085
									si:ch1073-189o9.1		ENSDARG00000037390	ENSDART00000054408
									si:ch1073-291c23.2		ENSDARG00000032129	ENSDART00000026090
									si:ch211-106g4.2		ENSDARG00000032129	ENSDART00000151411
									si:ch211-113a14.28		ENSDARG00000032129	ENSDART00000151475
									si:ch211-113g11.6		ENSDARG00000032129	ENSDART00000151211
									si:ch211-113p18.3		ENSDARG00000032129	ENSDART00000151196
									si:ch211-122m3.1		ENSDARG00000032129	ENSDART00000047660
									si:ch211-13k12.1		ENSDARG00000032129	ENSDART00000122357
									si:ch211-145c1.1		ENSDARG00000032129	ENSDART00000111878
									si:ch211-165f21.4		ENSDARG00000042900	ENSDART00000122740
									si:ch211-197n1.2		ENSDARG00000044191	ENSDART00000064878
									si:ch211-206a7.2		ENSDARG00000017058	ENSDART00000127953
									si:ch211-207c6.4		ENSDARG00000017058	ENSDART00000172328
									si:ch211-214e3.5		ENSDARG00000017058	ENSDART00000015786
									si:ch211-216l23.1		ENSDARG00000027992	ENSDART00000136365
									si:ch211-217a12.1		ENSDARG00000027992	ENSDART00000035428
									si:ch211-226f6.1		ENSDARG00000027992	ENSDART00000133903
									si:ch211-234b19.1		ENSDARG00000027992	ENSDART00000122139
									si:ch211-239e6.4		ENSDARG00000089769	ENSDART00000122966
									si:ch211-239i4.3		ENSDARG00000089769	ENSDART00000111589
									si:ch211-253b1.4		ENSDARG00000089769	ENSDART00000166907
									si:ch211-260p9.3		ENSDARG00000045802	ENSDART00000067323
									si:ch211-273d2.3		ENSDARG00000036987	ENSDART00000053754
									si:ch211-278a6.1		ENSDARG00000034916	ENSDART00000044128
									si:ch211-283g2.1		ENSDARG00000061685	ENSDART00000136140
									si:ch211-287c22.1		ENSDARG00000034957	ENSDART00000050729
									si:ch211-69m14.1		ENSDARG00000034957	ENSDART00000153142
									si:ch73-196k8.2		ENSDARG00000056400	ENSDART00000078889
									si:ch73-249k16.4		ENSDARG00000070538	ENSDART00000103640
									si:ch73-265d7.2		ENSDARG00000013441	ENSDART00000023531
									si:ch73-340m8.2		ENSDARG00000055493	ENSDART00000077853
									si:ch73-389b16.2		ENSDARG00000055493	ENSDART00000148190
									si:ch73-46j18.4		ENSDARG00000101482	ENSDART00000160690
									si:ch73-74h11.1		ENSDARG00000071565	ENSDART00000144193
									si:ch73-7i4.2		ENSDARG00000071565	ENSDART00000066644
									si:dkey-100n10.2		ENSDARG00000071565	ENSDART00000164750
									si:dkey-14a7.2		ENSDARG00000012796	ENSDART00000143295
									si:dkey-14a7.4		ENSDARG00000012796	ENSDART00000004745
									si:dkey-175g6.5		ENSDARG00000054033	ENSDART00000136415
									si:dkey-187i8.2		ENSDARG00000059616	ENSDART00000083040
									si:dkey-193b15.9		ENSDARG00000071501	ENSDART00000105778
									si:dkey-203a12.2		ENSDARG00000069926	ENSDART00000061321
									si:dkey-238n5.3		ENSDARG00000041065	ENSDART00000060162
									si:dkey-242e21.3		ENSDARG00000041065	ENSDART00000149816
									si:dkey-25o1.6		ENSDARG00000041065	ENSDART00000152108
									si:dkey-266f7.1		ENSDARG00000071699	ENSDART00000106205
									si:dkey-266f7.9		ENSDARG00000071699	ENSDART00000132499
									si:dkey-276l13.3		ENSDARG00000096280	ENSDART00000151461
									si:dkey-27p18.5		ENSDARG00000096280	ENSDART00000151307
									si:dkey-32e23.4		ENSDARG00000013539	ENSDART00000016430
									si:dkey-33c12.3		ENSDARG00000013539	ENSDART00000042377
									si:dkey-34f9.3		ENSDARG00000013539	ENSDART00000046079
									si:dkey-37m8.10		ENSDARG00000013539	ENSDART00000050481
									si:dkey-46l15.1		ENSDARG00000013539	ENSDART00000079724
									si:dkey-47k20.3		ENSDARG00000052417	ENSDART00000074272
									si:dkey-57c15.1		ENSDARG00000092181	ENSDART00000134416
									si:dkey-63j1.7		ENSDARG00000045935	ENSDART00000161669
									si:dkey-76p7.5		ENSDARG00000045935	ENSDART00000114062
									si:dkey-89b17.4		ENSDARG00000030716	ENSDART00000045245
									si:dkey-96f10.1		ENSDARG00000012671	ENSDART00000004241
									si:dkey-9i5.4		ENSDARG00000069085	ENSDART00000143487
									si:dkey-9i5.5		ENSDARG00000069085	ENSDART00000023545
									si:dkeyp-67e1.2		ENSDARG00000036903	ENSDART00000053588
									si:dkeyp-67e6.5		ENSDARG00000036903	ENSDART00000146510
									si:dkeyp-85h7.1		ENSDARG00000036903	ENSDART00000133391
									si:dkeyp-94b4.1		ENSDARG00000098635	ENSDART00000168531
									siae		ENSDARG00000101831	ENSDART00000162474
									sipa1l1		ENSDARG00000101831	ENSDART00000161774
									sirt6		ENSDARG00000101831	ENSDART00000166103
									six6b		ENSDARG00000101831	ENSDART00000170665
									slc10a3		ENSDARG00000001785	ENSDART00000016303
									slc20a1b		ENSDARG00000001785	ENSDART00000148452
									slc25a32b		ENSDARG00000001785	ENSDART00000148602
									slc27a2a		ENSDARG00000031138	ENSDART00000042271
									slc2a9l1		ENSDARG00000031138	ENSDART00000158027
									slc30a10		ENSDARG00000034043	ENSDART00000043857
									slc34a2b		ENSDARG00000034420	ENSDART00000045628
									slc37a4b		ENSDARG00000003971	ENSDART00000012862
									slc39a9		ENSDARG00000007950	ENSDART00000153537
									slc44a5a		ENSDARG00000007950	ENSDART00000154865
									slc5a12		ENSDARG00000007950	ENSDART00000022861
									slco5a1		ENSDARG00000028581	ENSDART00000039438
									slit3		ENSDARG00000028581	ENSDART00000130930
									smc1a		ENSDARG00000028581	ENSDART00000146786
									smtla		ENSDARG00000055429	ENSDART00000148191
									smyd3		ENSDARG00000055429	ENSDART00000136624
									smyhc1		ENSDARG00000055429	ENSDART00000077775
									snai2		ENSDARG00000032799	ENSDART00000138890
									sncb		ENSDARG00000032799	ENSDART00000042673
									snrka		ENSDARG00000017880	ENSDART00000124751
									snrpa1		ENSDARG00000017880	ENSDART00000137322
									snrpb		ENSDARG00000017880	ENSDART00000131361
									snx21		ENSDARG00000017880	ENSDART00000166540
									snx33		ENSDARG00000017880	ENSDART00000064581
									snx7		ENSDARG00000045589	ENSDART00000067031
									snx8a		ENSDARG00000023587	ENSDART00000030934
									socs3a		ENSDARG00000105215	ENSDART00000170626
									socs3b		ENSDARG00000105215	ENSDART00000164230
									sod1		ENSDARG00000037020	ENSDART00000141075
									sox2		ENSDARG00000037020	ENSDART00000146458
									sox9a		ENSDARG00000037020	ENSDART00000053807
									spata6		ENSDARG00000037020	ENSDART00000164356
									specc1		ENSDARG00000037020	ENSDART00000050915
									spice1		ENSDARG00000037020	ENSDART00000165744
									spon1a		ENSDARG00000104665	ENSDART00000172664
									spon1b		ENSDARG00000104665	ENSDART00000163622
									spred1		ENSDARG00000061368	ENSDART00000087450
									spred2b		ENSDARG00000043821	ENSDART00000104317
									sptb		ENSDARG00000043821	ENSDART00000064343
									srebf1		ENSDARG00000060697	ENSDART00000148870
									srl		ENSDARG00000025131	ENSDART00000031508
									stap2a		ENSDARG00000056322	ENSDART00000130101
									ston2		ENSDARG00000056322	ENSDART00000137220
									stx16		ENSDARG00000056322	ENSDART00000133065
									stx1b		ENSDARG00000056322	ENSDART00000147348
									stxbp5b		ENSDARG00000056322	ENSDART00000136863
									sult6b1		ENSDARG00000056322	ENSDART00000131870
									sumo2b		ENSDARG00000056322	ENSDART00000078720
									syne1b		ENSDARG00000056322	ENSDART00000078740
									sytl2		ENSDARG00000056322	ENSDART00000139218
									sytl3		ENSDARG00000056322	ENSDART00000044719
									taar14j		ENSDARG00000056322	ENSDART00000078721
									tank		ENSDARG00000056322	ENSDART00000130957
									tardbpl		ENSDARG00000056322	ENSDART00000130424
									tars		ENSDARG00000056322	ENSDART00000078757
									tarsl2		ENSDARG00000056322	ENSDART00000131856
									tas1r3		ENSDARG00000056322	ENSDART00000078747
									tbc1d23		ENSDARG00000056322	ENSDART00000126467
									tbx1		ENSDARG00000056322	ENSDART00000078759
									tbx18		ENSDARG00000056322	ENSDART00000129841
									tbx2b		ENSDARG00000056322	ENSDART00000074061
									tbx5a		ENSDARG00000037879	ENSDART00000028673
									tcf4		ENSDARG00000037879	ENSDART00000138280
									tcf7l2		ENSDARG00000044001	ENSDART00000064597
									tdrkh		ENSDARG00000044001	ENSDART00000103272
									tecta		ENSDARG00000009653	ENSDART00000150913
									tenc1a		ENSDARG00000009653	ENSDART00000151613
									tfap2c		ENSDARG00000014018	ENSDART00000005641
									tgif1		ENSDARG00000014018	ENSDART00000134373
									tgm1		ENSDARG00000002330	ENSDART00000019078
									tgm2l		ENSDARG00000002330	ENSDART00000144982
									tiam1a		ENSDARG00000002330	ENSDART00000132313
									timeless		ENSDARG00000034165	ENSDART00000149965
									timm10b		ENSDARG00000034165	ENSDART00000041820
									tjp2b		ENSDARG00000104223	ENSDART00000162858
									tlk1a		ENSDARG00000104223	ENSDART00000164380
									tlk2		ENSDARG00000104223	ENSDART00000157524
									tlr18		ENSDARG00000104223	ENSDART00000160193
									tm2d1		ENSDARG00000034504	ENSDART00000139655
									tmem161b		ENSDARG00000034504	ENSDART00000158921
									tmem26b		ENSDARG00000034504	ENSDART00000044208
									tmem39a		ENSDARG00000054749	ENSDART00000076997
									tmem53		ENSDARG00000054749	ENSDART00000148748
									tnip1		ENSDARG00000068365	ENSDART00000076420
									tpk1		ENSDARG00000068365	ENSDART00000147131
									tpm1		ENSDARG00000068365	ENSDART00000127460
									trib2		ENSDARG00000099840	ENSDART00000158919
									trim23		ENSDARG00000099840	ENSDART00000172625
									trim25l		ENSDARG00000045574	ENSDART00000135730
									trim63		ENSDARG00000045574	ENSDART00000131973
									triqk		ENSDARG00000045574	ENSDART00000145513
									trmt6		ENSDARG00000045574	ENSDART00000147853
									tsc22d3		ENSDARG00000040478	ENSDART00000170167
									tspan11		ENSDARG00000040478	ENSDART00000059243
									tspan14		ENSDARG00000078415	ENSDART00000142888
									tsr1		ENSDARG00000080015	ENSDART00000141364
									tssc1		ENSDARG00000080015	ENSDART00000113737
									tubgcp4		ENSDARG00000099386	ENSDART00000168789
									twist2		ENSDARG00000099386	ENSDART00000170658
									uba52		ENSDARG00000068247	ENSDART00000111301
									ube2q2		ENSDARG00000068247	ENSDART00000146120
									ube2t		ENSDARG00000017121	ENSDART00000002309
									ube2v2		ENSDARG00000100528	ENSDART00000161846
									ugcg		ENSDARG00000100528	ENSDART00000173360
									uhmk1		ENSDARG00000058470	ENSDART00000081341
									unc13c		ENSDARG00000058470	ENSDART00000151388
									unc50		ENSDARG00000061774	ENSDART00000149508
									uox		ENSDARG00000061774	ENSDART00000149829
									upf1		ENSDARG00000061774	ENSDART00000088508
									uqcrfs1		ENSDARG00000014634	ENSDART00000019861
									ush2a		ENSDARG00000014634	ENSDART00000114292
									usp22		ENSDARG00000022895	ENSDART00000034883
									usp42		ENSDARG00000022895	ENSDART00000148830
									uts2a		ENSDARG00000009681	ENSDART00000005140
									uvrag		ENSDARG00000009681	ENSDART00000138111
									vamp3		ENSDARG00000029764	ENSDART00000131731
									vav3b		ENSDARG00000029764	ENSDART00000097433
									vax2		ENSDARG00000029764	ENSDART00000131309
									veph		ENSDARG00000029764	ENSDART00000134219
									vipr2		ENSDARG00000029764	ENSDART00000134953
									vps25		ENSDARG00000029764	ENSDART00000138962
									vps33a		ENSDARG00000029764	ENSDART00000027392
									vrk1		ENSDARG00000029764	ENSDART00000039551
									vti1a		ENSDARG00000029764	ENSDART00000160786
									vwc2		ENSDARG00000029764	ENSDART00000099134
									wipf2b		ENSDARG00000009418	ENSDART00000135911
									wnt11r		ENSDARG00000009418	ENSDART00000138702
									wnt4a		ENSDARG00000009418	ENSDART00000163250
									wrnip1		ENSDARG00000009418	ENSDART00000044083
									wwox		ENSDARG00000079751	ENSDART00000142056
									xbp1		ENSDARG00000103934	ENSDART00000170671
									xpo7		ENSDARG00000098240	ENSDART00000158273
									xrcc5		ENSDARG00000098240	ENSDART00000160507
									yap1		ENSDARG00000098240	ENSDART00000171700
									yif1b		ENSDARG00000098240	ENSDART00000161414
									zak		ENSDARG00000077840	ENSDART00000144970
									zbtb10		ENSDARG00000077840	ENSDART00000143510
									zbtb16a		ENSDARG00000077840	ENSDART00000033976
									zbtb24		ENSDARG00000102366	ENSDART00000162096
									zc3h3		ENSDARG00000102366	ENSDART00000165708
									zfand2a		ENSDARG00000102366	ENSDART00000159413
									zfhx4		ENSDARG00000026325	ENSDART00000077280
									zfp64		ENSDARG00000030350	ENSDART00000114035
									zfpm2a		ENSDARG00000030350	ENSDART00000040368
									zfyve9a		ENSDARG00000012005	ENSDART00000126916
									zgc:101123		ENSDARG00000012005	ENSDART00000131349
									zgc:101549		ENSDARG00000012005	ENSDART00000162940
									zgc:101564		ENSDARG00000045416	ENSDART00000066783
									zgc:109736		ENSDARG00000045416	ENSDART00000150185
									zgc:110091		ENSDARG00000033973	ENSDART00000135632
									zgc:110191		ENSDARG00000033973	ENSDART00000044452
									zgc:110204		ENSDARG00000032614	ENSDART00000100194
									zgc:110289		ENSDARG00000032614	ENSDART00000155212
									zgc:110372		ENSDARG00000032614	ENSDART00000156584
									zgc:110852		ENSDARG00000032614	ENSDART00000156160
									zgc:112148		ENSDARG00000032614	ENSDART00000154714
									zgc:112294		ENSDARG00000032614	ENSDART00000156914
									zgc:112426		ENSDARG00000032614	ENSDART00000050649
									zgc:113025		ENSDARG00000032614	ENSDART00000145918
									zgc:113142		ENSDARG00000032614	ENSDART00000152414
									zgc:113295		ENSDARG00000032614	ENSDART00000154311
									zgc:114130		ENSDARG00000032614	ENSDART00000152330
									zgc:136336		ENSDARG00000032614	ENSDART00000152790
									zgc:136791		ENSDARG00000032614	ENSDART00000136901
									zgc:136872		ENSDARG00000032614	ENSDART00000142827
									zgc:136924		ENSDARG00000032614	ENSDART00000142982
									zgc:152692		ENSDARG00000086493	ENSDART00000078226
									zgc:152954		ENSDARG00000098764	ENSDART00000164568
									zgc:152977		ENSDARG00000098764	ENSDART00000166327
									zgc:153039		ENSDARG00000098764	ENSDART00000160265
									zgc:153067		ENSDARG00000098764	ENSDART00000163740
									zgc:153372		ENSDARG00000098764	ENSDART00000164299
									zgc:153846		ENSDARG00000004130	ENSDART00000006673
									zgc:154085		ENSDARG00000026049	ENSDART00000155402
									zgc:154142		ENSDARG00000007241	ENSDART00000005143
									zgc:158785		ENSDARG00000007241	ENSDART00000135040
									zgc:158824		ENSDARG00000001220	ENSDART00000039157
									zgc:162298		ENSDARG00000001220	ENSDART00000124901
									zgc:162879		ENSDARG00000006837	ENSDART00000024104
									zgc:162939		ENSDARG00000053424	ENSDART00000137528
									zgc:165532		ENSDARG00000053424	ENSDART00000101080
									zgc:165617		ENSDARG00000078582	ENSDART00000138167
									zgc:165627		ENSDARG00000078582	ENSDART00000133063
									zgc:171489		ENSDARG00000078582	ENSDART00000109288
									zgc:171544		ENSDARG00000009438	ENSDART00000014062
									zgc:171550		ENSDARG00000009438	ENSDART00000167908
									zgc:171558		ENSDARG00000102879	ENSDART00000157612
									zgc:171579		ENSDARG00000102879	ENSDART00000164117
									zgc:171599		ENSDARG00000102879	ENSDART00000165427
									zgc:171775		ENSDARG00000027825	ENSDART00000154940
									zgc:171951		ENSDARG00000027825	ENSDART00000155977
									zgc:172282		ENSDARG00000027825	ENSDART00000122762
									zgc:173548		ENSDARG00000027825	ENSDART00000156979
									zgc:173577		ENSDARG00000042940	ENSDART00000146484
									zgc:173837		ENSDARG00000042940	ENSDART00000063038
									zgc:174178		ENSDARG00000070560	ENSDART00000103704
									zgc:174356		ENSDARG00000070560	ENSDART00000149107
									zgc:174864		ENSDARG00000056181	ENSDART00000017229
									zgc:175088		ENSDARG00000056181	ENSDART00000132570
									zgc:175145		ENSDARG00000056181	ENSDART00000101117
									zgc:175280		ENSDARG00000056181	ENSDART00000143661
									zgc:193616		ENSDARG00000056181	ENSDART00000145469
									zgc:194841		ENSDARG00000056181	ENSDART00000156658
									zgc:195081		ENSDARG00000056181	ENSDART00000157454
									zgc:195633		ENSDARG00000007220	ENSDART00000142010
									zgc:55870		ENSDARG00000007220	ENSDART00000146853
									zgc:56676		ENSDARG00000007220	ENSDART00000136208
									zgc:64190		ENSDARG00000007220	ENSDART00000019006
									zgc:77052		ENSDARG00000017929	ENSDART00000124740
									zgc:77391		ENSDARG00000017929	ENSDART00000124181
									zgc:77784		ENSDARG00000103937	ENSDART00000164297
									zgc:77938		ENSDARG00000103937	ENSDART00000169129
									zgc:85789		ENSDARG00000103937	ENSDART00000164621
									zgc:92445		ENSDARG00000103937	ENSDART00000169119
									zgc:92511		ENSDARG00000103937	ENSDART00000163735
									zgc:92902		ENSDARG00000103937	ENSDART00000160234
									zic4		ENSDARG00000103937	ENSDART00000160466
									znf423		ENSDARG00000041776	ENSDART00000146084
									znf536		ENSDARG00000041776	ENSDART00000061232
									zranb1b		ENSDARG00000056745	ENSDART00000140161
											ENSDARG00000056745	ENSDART00000144523
											ENSDARG00000056745	ENSDART00000100853
											ENSDARG00000056966	ENSDART00000079536
											ENSDARG00000056966	ENSDART00000165554
											ENSDARG00000032765	ENSDART00000049066
											ENSDARG00000032765	ENSDART00000002682
											ENSDARG00000032765	ENSDART00000144452
											ENSDARG00000032765	ENSDART00000150705
											ENSDARG00000032765	ENSDART00000150468
											ENSDARG00000032765	ENSDART00000170136
											ENSDARG00000099694	ENSDART00000161123
											ENSDARG00000099694	ENSDART00000167146
											ENSDARG00000099694	ENSDART00000164841
											ENSDARG00000040008	ENSDART00000058530
											ENSDARG00000040008	ENSDART00000098859
											ENSDARG00000062420	ENSDART00000138233
											ENSDARG00000062420	ENSDART00000138382
											ENSDARG00000062420	ENSDART00000090237
											ENSDARG00000062420	ENSDART00000090242
											ENSDARG00000087188	ENSDART00000127604
											ENSDARG00000061836	ENSDART00000139001
											ENSDARG00000061836	ENSDART00000090235
											ENSDARG00000061836	ENSDART00000044670
											ENSDARG00000105261	ENSDART00000169456
											ENSDARG00000105261	ENSDART00000164967
											ENSDARG00000077710	ENSDART00000113171
											ENSDARG00000104786	ENSDART00000168749
											ENSDARG00000104786	ENSDART00000168320
											ENSDARG00000088390	ENSDART00000109818
											ENSDARG00000088390	ENSDART00000139835
											ENSDARG00000088390	ENSDART00000123002
											ENSDARG00000043066	ENSDART00000063231
											ENSDARG00000044402	ENSDART00000065208
											ENSDARG00000090912	ENSDART00000050399
											ENSDARG00000090912	ENSDART00000139875
											ENSDARG00000090912	ENSDART00000132754
											ENSDARG00000090912	ENSDART00000124663
											ENSDARG00000062631	ENSDART00000135731
											ENSDARG00000062631	ENSDART00000090788
											ENSDARG00000060758	ENSDART00000150109
											ENSDARG00000060758	ENSDART00000085971
											ENSDARG00000018721	ENSDART00000018469
											ENSDARG00000018721	ENSDART00000134988
											ENSDARG00000018721	ENSDART00000135780
											ENSDARG00000018721	ENSDART00000165973
											ENSDARG00000018721	ENSDART00000158988
											ENSDARG00000052695	ENSDART00000133384
											ENSDARG00000104314	ENSDART00000167706
											ENSDARG00000104314	ENSDART00000162613
											ENSDARG00000104314	ENSDART00000163702
											ENSDARG00000104314	ENSDART00000167963
											ENSDARG00000104314	ENSDART00000162021
											ENSDARG00000104314	ENSDART00000167054
											ENSDARG00000104314	ENSDART00000168885
											ENSDARG00000102153	ENSDART00000159212
											ENSDARG00000102153	ENSDART00000159267
											ENSDARG00000102153	ENSDART00000164904
											ENSDARG00000102153	ENSDART00000169341
											ENSDARG00000061454	ENSDART00000141629
											ENSDARG00000061454	ENSDART00000132583
											ENSDARG00000061454	ENSDART00000134196
											ENSDARG00000061454	ENSDART00000087657
											ENSDARG00000061454	ENSDART00000164458
											ENSDARG00000059043	ENSDART00000082046
											ENSDARG00000021853	ENSDART00000035018
											ENSDARG00000021853	ENSDART00000132895
											ENSDARG00000059897	ENSDART00000131732
											ENSDARG00000059897	ENSDART00000140574
											ENSDARG00000059897	ENSDART00000083790
											ENSDARG00000069066	ENSDART00000100214
											ENSDARG00000069066	ENSDART00000154173
											ENSDARG00000074955	ENSDART00000136068
											ENSDARG00000074955	ENSDART00000142320
											ENSDARG00000074955	ENSDART00000130950
											ENSDARG00000074955	ENSDART00000126383
											ENSDARG00000074955	ENSDART00000007981
											ENSDARG00000074955	ENSDART00000162500
											ENSDARG00000003934	ENSDART00000016103
											ENSDARG00000022098	ENSDART00000122687
											ENSDARG00000006894	ENSDART00000009326
											ENSDARG00000071209	ENSDART00000105135
											ENSDARG00000071209	ENSDART00000158531
											ENSDARG00000013014	ENSDART00000143648
											ENSDARG00000013014	ENSDART00000013359
											ENSDARG00000102669	ENSDART00000170808
											ENSDARG00000052279	ENSDART00000074100
											ENSDARG00000091555	ENSDART00000168698
											ENSDARG00000091555	ENSDART00000168556
											ENSDARG00000091555	ENSDART00000157402
											ENSDARG00000091555	ENSDART00000128684
											ENSDARG00000030703	ENSDART00000006538
											ENSDARG00000030703	ENSDART00000150420
											ENSDARG00000094992	ENSDART00000064083
											ENSDARG00000101325	ENSDART00000159249
											ENSDARG00000024139	ENSDART00000029063
											ENSDARG00000070657	ENSDART00000016248
											ENSDARG00000070657	ENSDART00000132271
											ENSDARG00000070657	ENSDART00000131486
											ENSDARG00000001913	ENSDART00000137848
											ENSDARG00000001913	ENSDART00000006817
											ENSDARG00000102822	ENSDART00000165013
											ENSDARG00000017703	ENSDART00000020808
											ENSDARG00000021555	ENSDART00000029649
											ENSDARG00000021555	ENSDART00000146240
											ENSDARG00000021555	ENSDART00000157437
											ENSDARG00000034826	ENSDART00000041531
											ENSDARG00000034826	ENSDART00000140011
											ENSDARG00000034826	ENSDART00000147834
											ENSDARG00000028148	ENSDART00000076998
											ENSDARG00000028148	ENSDART00000138332
											ENSDARG00000028148	ENSDART00000141310
											ENSDARG00000028148	ENSDART00000139782
											ENSDARG00000028148	ENSDART00000134330
											ENSDARG00000028148	ENSDART00000132064
											ENSDARG00000028148	ENSDART00000144443
											ENSDARG00000028148	ENSDART00000133796
											ENSDARG00000028148	ENSDART00000134424
											ENSDARG00000028148	ENSDART00000132004
											ENSDARG00000028148	ENSDART00000076992
											ENSDARG00000028148	ENSDART00000160921
											ENSDARG00000028148	ENSDART00000160944
											ENSDARG00000100398	ENSDART00000169817
											ENSDARG00000100398	ENSDART00000162157
											ENSDARG00000100398	ENSDART00000172008
											ENSDARG00000100398	ENSDART00000170657
											ENSDARG00000015879	ENSDART00000029014
											ENSDARG00000100494	ENSDART00000165698
											ENSDARG00000100494	ENSDART00000165782
											ENSDARG00000100494	ENSDART00000165330
											ENSDARG00000054378	ENSDART00000132930
											ENSDARG00000054378	ENSDART00000015267
											ENSDARG00000054378	ENSDART00000148317
											ENSDARG00000054378	ENSDART00000134431
											ENSDARG00000054378	ENSDART00000144448
											ENSDARG00000054378	ENSDART00000048893
											ENSDARG00000008127	ENSDART00000106391
											ENSDARG00000008127	ENSDART00000152322
											ENSDARG00000008127	ENSDART00000171511
											ENSDARG00000008127	ENSDART00000171846
											ENSDARG00000008127	ENSDART00000166531
											ENSDARG00000034344	ENSDART00000149443
											ENSDARG00000034344	ENSDART00000173398
											ENSDARG00000062720	ENSDART00000139733
											ENSDARG00000062720	ENSDART00000134692
											ENSDARG00000062720	ENSDART00000091004
											ENSDARG00000101232	ENSDART00000160464
											ENSDARG00000037695	ENSDART00000114302
											ENSDARG00000071904	ENSDART00000106704
											ENSDARG00000071904	ENSDART00000161674
											ENSDARG00000019501	ENSDART00000133441
											ENSDARG00000019451	ENSDART00000129866
											ENSDARG00000019451	ENSDART00000169931
											ENSDARG00000012591	ENSDART00000019063
											ENSDARG00000041022	ENSDART00000009223
											ENSDARG00000041022	ENSDART00000166002
											ENSDARG00000051756	ENSDART00000102855
											ENSDARG00000051756	ENSDART00000148566
											ENSDARG00000051756	ENSDART00000149763
											ENSDARG00000051756	ENSDART00000073435
											ENSDARG00000051756	ENSDART00000171026
											ENSDARG00000051756	ENSDART00000157623
											ENSDARG00000073869	ENSDART00000114330
											ENSDARG00000073869	ENSDART00000157215
											ENSDARG00000028000	ENSDART00000033394
											ENSDARG00000028000	ENSDART00000131753
											ENSDARG00000028000	ENSDART00000167043
											ENSDARG00000035608	ENSDART00000051621
											ENSDARG00000014704	ENSDART00000101937
											ENSDARG00000014704	ENSDART00000010350
											ENSDARG00000042874	ENSDART00000062930
											ENSDARG00000045378	ENSDART00000141620
											ENSDARG00000011743	ENSDART00000135044
											ENSDARG00000055129	ENSDART00000077445
											ENSDARG00000055129	ENSDART00000108692
											ENSDARG00000044091	ENSDART00000149362
											ENSDARG00000044091	ENSDART00000002974
											ENSDARG00000036005	ENSDART00000052268
											ENSDARG00000036005	ENSDART00000123086
											ENSDARG00000036194	ENSDART00000148319
											ENSDARG00000036194	ENSDART00000173243
											ENSDARG00000036194	ENSDART00000052569
											ENSDARG00000036194	ENSDART00000137652
											ENSDARG00000104325	ENSDART00000166598
											ENSDARG00000104325	ENSDART00000171872
											ENSDARG00000090752	ENSDART00000125299
											ENSDARG00000004576	ENSDART00000043866
											ENSDARG00000011821	ENSDART00000128182
											ENSDARG00000011821	ENSDART00000140035
											ENSDARG00000011821	ENSDART00000005901
											ENSDARG00000011821	ENSDART00000106488
											ENSDARG00000078417	ENSDART00000133533
											ENSDARG00000075821	ENSDART00000142442
											ENSDARG00000075821	ENSDART00000131669
											ENSDARG00000075821	ENSDART00000111518
											ENSDARG00000075821	ENSDART00000137308
											ENSDARG00000075821	ENSDART00000166663
											ENSDARG00000036985	ENSDART00000042781
											ENSDARG00000015851	ENSDART00000012670
											ENSDARG00000040942	ENSDART00000060001
											ENSDARG00000040942	ENSDART00000136285
											ENSDARG00000098783	ENSDART00000162719
											ENSDARG00000098783	ENSDART00000167276
											ENSDARG00000098783	ENSDART00000160293
											ENSDARG00000098783	ENSDART00000157647
											ENSDARG00000098783	ENSDART00000167045
											ENSDARG00000056127	ENSDART00000078557
											ENSDARG00000056127	ENSDART00000148216
											ENSDARG00000043135	ENSDART00000063333
											ENSDARG00000043135	ENSDART00000170818
											ENSDARG00000052025	ENSDART00000073755
											ENSDARG00000052025	ENSDART00000122242
											ENSDARG00000101472	ENSDART00000163098
											ENSDARG00000101472	ENSDART00000165691
											ENSDARG00000101472	ENSDART00000167670
											ENSDARG00000095896	ENSDART00000149949
											ENSDARG00000095896	ENSDART00000149202
											ENSDARG00000005559	ENSDART00000025031
											ENSDARG00000053205	ENSDART00000112567
											ENSDARG00000053205	ENSDART00000170521
											ENSDARG00000002016	ENSDART00000051663
											ENSDARG00000002016	ENSDART00000161372
											ENSDARG00000002016	ENSDART00000171339
											ENSDARG00000002016	ENSDART00000025368
											ENSDARG00000043250	ENSDART00000063492
											ENSDARG00000102012	ENSDART00000172681
											ENSDARG00000102012	ENSDART00000160195
											ENSDARG00000032430	ENSDART00000016860
											ENSDARG00000032430	ENSDART00000135541
											ENSDARG00000090337	ENSDART00000125430
											ENSDARG00000037883	ENSDART00000083367
											ENSDARG00000045371	ENSDART00000123674
											ENSDARG00000045371	ENSDART00000168059
											ENSDARG00000045371	ENSDART00000066720
											ENSDARG00000006288	ENSDART00000127443
											ENSDARG00000044183	ENSDART00000064866
											ENSDARG00000044183	ENSDART00000146489
											ENSDARG00000022254	ENSDART00000029451
											ENSDARG00000031702	ENSDART00000152765
											ENSDARG00000031702	ENSDART00000152616
											ENSDARG00000031702	ENSDART00000043236
											ENSDARG00000010246	ENSDART00000012630
											ENSDARG00000010246	ENSDART00000035545
											ENSDARG00000041952	ENSDART00000114931
											ENSDARG00000041952	ENSDART00000165167
											ENSDARG00000061830	ENSDART00000140263
											ENSDARG00000061830	ENSDART00000088653
											ENSDARG00000013966	ENSDART00000012859
											ENSDARG00000013966	ENSDART00000171628
											ENSDARG00000070674	ENSDART00000103987
											ENSDARG00000012234	ENSDART00000002835
											ENSDARG00000012234	ENSDART00000153101
											ENSDARG00000012234	ENSDART00000162528
											ENSDARG00000101947	ENSDART00000168540
											ENSDARG00000101947	ENSDART00000171482
											ENSDARG00000101947	ENSDART00000162920
											ENSDARG00000043757	ENSDART00000146727
											ENSDARG00000043757	ENSDART00000040308
											ENSDARG00000055026	ENSDART00000140910
											ENSDARG00000055026	ENSDART00000077304
											ENSDARG00000022951	ENSDART00000033691
											ENSDARG00000031737	ENSDART00000049154
											ENSDARG00000022841	ENSDART00000151908
											ENSDARG00000022841	ENSDART00000028407
											ENSDARG00000071437	ENSDART00000137111
											ENSDARG00000071437	ENSDART00000105607
											ENSDARG00000071437	ENSDART00000137873
											ENSDARG00000015891	ENSDART00000004122
											ENSDARG00000015891	ENSDART00000169949
											ENSDARG00000005754	ENSDART00000083314
											ENSDARG00000005754	ENSDART00000133709
											ENSDARG00000005754	ENSDART00000155124
											ENSDARG00000005754	ENSDART00000166518
											ENSDARG00000045006	ENSDART00000092552
											ENSDARG00000100422	ENSDART00000172566
											ENSDARG00000100422	ENSDART00000169667
											ENSDARG00000100422	ENSDART00000169187
											ENSDARG00000086034	ENSDART00000151279
											ENSDARG00000086034	ENSDART00000151166
											ENSDARG00000086034	ENSDART00000125236
											ENSDARG00000086034	ENSDART00000084454
											ENSDARG00000063390	ENSDART00000170952
											ENSDARG00000063390	ENSDART00000144571
											ENSDARG00000040190	ENSDART00000058789
											ENSDARG00000002026	ENSDART00000131553
											ENSDARG00000002026	ENSDART00000139958
											ENSDARG00000002026	ENSDART00000136913
											ENSDARG00000002026	ENSDART00000018737
											ENSDARG00000103935	ENSDART00000170555
											ENSDARG00000103935	ENSDART00000165301
											ENSDARG00000029036	ENSDART00000034248
											ENSDARG00000029036	ENSDART00000152898
											ENSDARG00000029036	ENSDART00000152970
											ENSDARG00000029036	ENSDART00000153182
											ENSDARG00000068587	ENSDART00000099247
											ENSDARG00000068587	ENSDART00000099248
											ENSDARG00000068587	ENSDART00000134495
											ENSDARG00000068587	ENSDART00000165590
											ENSDARG00000006092	ENSDART00000005927
											ENSDARG00000006092	ENSDART00000168069
											ENSDARG00000035655	ENSDART00000132800
											ENSDARG00000059972	ENSDART00000083999
											ENSDARG00000059972	ENSDART00000143050
											ENSDARG00000059972	ENSDART00000125950
											ENSDARG00000059972	ENSDART00000163648
											ENSDARG00000014817	ENSDART00000002624
											ENSDARG00000014817	ENSDART00000148087
											ENSDARG00000014817	ENSDART00000110553
											ENSDARG00000103032	ENSDART00000160206
											ENSDARG00000043593	ENSDART00000139947
											ENSDARG00000043593	ENSDART00000064017
											ENSDARG00000073665	ENSDART00000132486
											ENSDARG00000073665	ENSDART00000141685
											ENSDARG00000062328	ENSDART00000132844
											ENSDARG00000062328	ENSDART00000089980
											ENSDARG00000014746	ENSDART00000122037
											ENSDARG00000014746	ENSDART00000150888
											ENSDARG00000014746	ENSDART00000151143
											ENSDARG00000014746	ENSDART00000055534
											ENSDARG00000014746	ENSDART00000151546
											ENSDARG00000014746	ENSDART00000151178
											ENSDARG00000014746	ENSDART00000165936
											ENSDARG00000019877	ENSDART00000030622
											ENSDARG00000054096	ENSDART00000076238
											ENSDARG00000063050	ENSDART00000147997
											ENSDARG00000063050	ENSDART00000091780
											ENSDARG00000003109	ENSDART00000020638
											ENSDARG00000003109	ENSDART00000134447
											ENSDARG00000003109	ENSDART00000138963
											ENSDARG00000003109	ENSDART00000144141
											ENSDARG00000039299	ENSDART00000057421
											ENSDARG00000007175	ENSDART00000021610
											ENSDARG00000007175	ENSDART00000172169
											ENSDARG00000007175	ENSDART00000162204
											ENSDARG00000007175	ENSDART00000101198
											ENSDARG00000014550	ENSDART00000144882
											ENSDARG00000014550	ENSDART00000144234
											ENSDARG00000014550	ENSDART00000041236
											ENSDARG00000014550	ENSDART00000171171
											ENSDARG00000009610	ENSDART00000040534
											ENSDARG00000070047	ENSDART00000102483
											ENSDARG00000070047	ENSDART00000133783
											ENSDARG00000015627	ENSDART00000135513
											ENSDARG00000015627	ENSDART00000075489
											ENSDARG00000070037	ENSDART00000102461
											ENSDARG00000068653	ENSDART00000152363
											ENSDARG00000070666	ENSDART00000103973
											ENSDARG00000100867	ENSDART00000164844
											ENSDARG00000100867	ENSDART00000157765
											ENSDARG00000042751	ENSDART00000062745
											ENSDARG00000070735	ENSDART00000134969
											ENSDARG00000009886	ENSDART00000019667
											ENSDARG00000104076	ENSDART00000163834
											ENSDARG00000104076	ENSDART00000170428
											ENSDARG00000105172	ENSDART00000157583
											ENSDARG00000060929	ENSDART00000086340
											ENSDARG00000060929	ENSDART00000143879
											ENSDARG00000060929	ENSDART00000145588
											ENSDARG00000060929	ENSDART00000136330
											ENSDARG00000060929	ENSDART00000139295
											ENSDARG00000060929	ENSDART00000134651
											ENSDARG00000026784	ENSDART00000097134
											ENSDARG00000026784	ENSDART00000076098
											ENSDARG00000026784	ENSDART00000034683
											ENSDARG00000025073	ENSDART00000030215
											ENSDARG00000025073	ENSDART00000148933
											ENSDARG00000101406	ENSDART00000166238
											ENSDARG00000053058	ENSDART00000075028
											ENSDARG00000053058	ENSDART00000134524
											ENSDARG00000055475	ENSDART00000077834
											ENSDARG00000055475	ENSDART00000139964
											ENSDARG00000055475	ENSDART00000134604
											ENSDARG00000100513	ENSDART00000167033
											ENSDARG00000104149	ENSDART00000164376
											ENSDARG00000104149	ENSDART00000172180
											ENSDARG00000036252	ENSDART00000052656
											ENSDARG00000070081	ENSDART00000058578
											ENSDARG00000070081	ENSDART00000132140
											ENSDARG00000090035	ENSDART00000157043
											ENSDARG00000090035	ENSDART00000163139
											ENSDARG00000090035	ENSDART00000031265
											ENSDARG00000098528	ENSDART00000159589
											ENSDARG00000003680	ENSDART00000147226
											ENSDARG00000003680	ENSDART00000123270
											ENSDARG00000003680	ENSDART00000151521
											ENSDARG00000003680	ENSDART00000151192
											ENSDARG00000003680	ENSDART00000162517
											ENSDARG00000003680	ENSDART00000010294
											ENSDARG00000022739	ENSDART00000028693
											ENSDARG00000057598	ENSDART00000080306
											ENSDARG00000070702	ENSDART00000132430
											ENSDARG00000070702	ENSDART00000104083
											ENSDARG00000044485	ENSDART00000065331
											ENSDARG00000039681	ENSDART00000058007
											ENSDARG00000023104	ENSDART00000156145
											ENSDARG00000023104	ENSDART00000156190
											ENSDARG00000023104	ENSDART00000153530
											ENSDARG00000023104	ENSDART00000103324
											ENSDARG00000040005	ENSDART00000058527
											ENSDARG00000040005	ENSDART00000131132
											ENSDARG00000101713	ENSDART00000161274
											ENSDARG00000101713	ENSDART00000162807
											ENSDARG00000101713	ENSDART00000162601
											ENSDARG00000067859	ENSDART00000136590
											ENSDARG00000067859	ENSDART00000097773
											ENSDARG00000000861	ENSDART00000021013
											ENSDARG00000000861	ENSDART00000164200
											ENSDARG00000000861	ENSDART00000074212
											ENSDARG00000104230	ENSDART00000160156
											ENSDARG00000104230	ENSDART00000168055
											ENSDARG00000104230	ENSDART00000169522
											ENSDARG00000019235	ENSDART00000051792
											ENSDARG00000007560	ENSDART00000046863
											ENSDARG00000007560	ENSDART00000140980
											ENSDARG00000013607	ENSDART00000129378
											ENSDARG00000013607	ENSDART00000026316
											ENSDARG00000062352	ENSDART00000140732
											ENSDARG00000062352	ENSDART00000090081
											ENSDARG00000052673	ENSDART00000148631
											ENSDARG00000052673	ENSDART00000150132
											ENSDARG00000052673	ENSDART00000149771
											ENSDARG00000052673	ENSDART00000149723
											ENSDARG00000052673	ENSDART00000169662
											ENSDARG00000052673	ENSDART00000074575
											ENSDARG00000035136	ENSDART00000137110
											ENSDARG00000035136	ENSDART00000145833
											ENSDARG00000035136	ENSDART00000166482
											ENSDARG00000035136	ENSDART00000163909
											ENSDARG00000035136	ENSDART00000050884
											ENSDARG00000090286	ENSDART00000113927
											ENSDARG00000090286	ENSDART00000153667
											ENSDARG00000016513	ENSDART00000022758
											ENSDARG00000016513	ENSDART00000127259
											ENSDARG00000028099	ENSDART00000144214
											ENSDARG00000028099	ENSDART00000029457
											ENSDARG00000067958	ENSDART00000129967
											ENSDARG00000074425	ENSDART00000001253
											ENSDARG00000000142	ENSDART00000135082
											ENSDARG00000101804	ENSDART00000160830
											ENSDARG00000104054	ENSDART00000143250
											ENSDARG00000089107	ENSDART00000122292
											ENSDARG00000074869	ENSDART00000147058
											ENSDARG00000074869	ENSDART00000142695
											ENSDARG00000074869	ENSDART00000140326
											ENSDARG00000074869	ENSDART00000136340
											ENSDARG00000074869	ENSDART00000133731
											ENSDARG00000074869	ENSDART00000109634
											ENSDARG00000070297	ENSDART00000152766
											ENSDARG00000070442	ENSDART00000148405
											ENSDARG00000070442	ENSDART00000148960
											ENSDARG00000070442	ENSDART00000170705
											ENSDARG00000070442	ENSDART00000115260
											ENSDARG00000087835	ENSDART00000137552
											ENSDARG00000067824	ENSDART00000136363
											ENSDARG00000067824	ENSDART00000143636
											ENSDARG00000067824	ENSDART00000097695
											ENSDARG00000042063	ENSDART00000139867
											ENSDARG00000042063	ENSDART00000102739
											ENSDARG00000093835	ENSDART00000145458
											ENSDARG00000093835	ENSDART00000142499
											ENSDARG00000024619	ENSDART00000131134
											ENSDARG00000074270	ENSDART00000153175
											ENSDARG00000059707	ENSDART00000146133
											ENSDARG00000059707	ENSDART00000083296
											ENSDARG00000055642	ENSDART00000078033
											ENSDARG00000055642	ENSDART00000152629
											ENSDARG00000094038	ENSDART00000139389
											ENSDARG00000095705	ENSDART00000173438
											ENSDARG00000095705	ENSDART00000141386
											ENSDARG00000095705	ENSDART00000137798
											ENSDARG00000095705	ENSDART00000172976
											ENSDARG00000095705	ENSDART00000148271
											ENSDARG00000095705	ENSDART00000171450
											ENSDARG00000092862	ENSDART00000137506
											ENSDARG00000092862	ENSDART00000131555
											ENSDARG00000092862	ENSDART00000143404
											ENSDARG00000059773	ENSDART00000148107
											ENSDARG00000059773	ENSDART00000083442
											ENSDARG00000046091	ENSDART00000132130
											ENSDARG00000046091	ENSDART00000049197
											ENSDARG00000091944	ENSDART00000139502
											ENSDARG00000091944	ENSDART00000163806
											ENSDARG00000075942	ENSDART00000135133
											ENSDARG00000075942	ENSDART00000113280
											ENSDARG00000040005	ENSDART00000058527
											ENSDARG00000040005	ENSDART00000131132
											ENSDARG00000093336	ENSDART00000134639
											ENSDARG00000093336	ENSDART00000132916
											ENSDARG00000039385	ENSDART00000143688
											ENSDARG00000039385	ENSDART00000042430
											ENSDARG00000040258	ENSDART00000058894
											ENSDARG00000103802	ENSDART00000170915
											ENSDARG00000103802	ENSDART00000158037
											ENSDARG00000062750	ENSDART00000148312
											ENSDARG00000093998	ENSDART00000136985
											ENSDARG00000062672	ENSDART00000090881
											ENSDARG00000003984	ENSDART00000135890
											ENSDARG00000003984	ENSDART00000022170
											ENSDARG00000096624	ENSDART00000152274
											ENSDARG00000102271	ENSDART00000169309
											ENSDARG00000101252	ENSDART00000171049
											ENSDARG00000075723	ENSDART00000134498
											ENSDARG00000058672	ENSDART00000132180
											ENSDARG00000058672	ENSDART00000151391
											ENSDARG00000058672	ENSDART00000136704
											ENSDARG00000058672	ENSDART00000146691
											ENSDARG00000058672	ENSDART00000081584
											ENSDARG00000075958	ENSDART00000146987
											ENSDARG00000058145	ENSDART00000150998
											ENSDARG00000058145	ENSDART00000030246
											ENSDARG00000058145	ENSDART00000162236
											ENSDARG00000068624	ENSDART00000133174
											ENSDARG00000068624	ENSDART00000099325
											ENSDARG00000063159	ENSDART00000142061
											ENSDARG00000063159	ENSDART00000138422
											ENSDARG00000057881	ENSDART00000137364
											ENSDARG00000077813	ENSDART00000135202
											ENSDARG00000029635	ENSDART00000133276
											ENSDARG00000029635	ENSDART00000059447
											ENSDARG00000105115	ENSDART00000161215
											ENSDARG00000014939	ENSDART00000141221
											ENSDARG00000014939	ENSDART00000140401
											ENSDARG00000014939	ENSDART00000165729
											ENSDARG00000014939	ENSDART00000168635
											ENSDARG00000075545	ENSDART00000151324
											ENSDARG00000075545	ENSDART00000151310
											ENSDARG00000075545	ENSDART00000138011
											ENSDARG00000075545	ENSDART00000150740
											ENSDARG00000075545	ENSDART00000108541
											ENSDARG00000074457	ENSDART00000139166
											ENSDARG00000074457	ENSDART00000135103
											ENSDARG00000074457	ENSDART00000146640
											ENSDARG00000074457	ENSDART00000103231
											ENSDARG00000092720	ENSDART00000142684
											ENSDARG00000092720	ENSDART00000127763
											ENSDARG00000098260	ENSDART00000171733
											ENSDARG00000102056	ENSDART00000161500
											ENSDARG00000102056	ENSDART00000170017
											ENSDARG00000102056	ENSDART00000166803
											ENSDARG00000040527	ENSDART00000059311
											ENSDARG00000040527	ENSDART00000163912
											ENSDARG00000020134	ENSDART00000114611
											ENSDARG00000031316	ENSDART00000125039
											ENSDARG00000103220	ENSDART00000163178
											ENSDARG00000103220	ENSDART00000163092
											ENSDARG00000010641	ENSDART00000039969
											ENSDARG00000010641	ENSDART00000138559
											ENSDARG00000010641	ENSDART00000132033
											ENSDARG00000010641	ENSDART00000170453
											ENSDARG00000026835	ENSDART00000032309
											ENSDARG00000026835	ENSDART00000131576
											ENSDARG00000036237	ENSDART00000052638
											ENSDARG00000036237	ENSDART00000150112
											ENSDARG00000070672	ENSDART00000103983
											ENSDARG00000070672	ENSDART00000158328
											ENSDARG00000103983	ENSDART00000166701
											ENSDARG00000036864	ENSDART00000053527
											ENSDARG00000036864	ENSDART00000115189
											ENSDARG00000036864	ENSDART00000159263
											ENSDARG00000093531	ENSDART00000139156
											ENSDARG00000077180	ENSDART00000111362
											ENSDARG00000077180	ENSDART00000150193
											ENSDARG00000077180	ENSDART00000148825
											ENSDARG00000077180	ENSDART00000161758
											ENSDARG00000070447	ENSDART00000103397
											ENSDARG00000070447	ENSDART00000160219
											ENSDARG00000017398	ENSDART00000131229
											ENSDARG00000017398	ENSDART00000140823
											ENSDARG00000017398	ENSDART00000165803
											ENSDARG00000005004	ENSDART00000156782
											ENSDARG00000005004	ENSDART00000009271
											ENSDARG00000071685	ENSDART00000152026
											ENSDARG00000071685	ENSDART00000151923
											ENSDARG00000034268	ENSDART00000146299
											ENSDARG00000034268	ENSDART00000126199
											ENSDARG00000055754	ENSDART00000078148
											ENSDARG00000038191	ENSDART00000128189
											ENSDARG00000058050	ENSDART00000105236
											ENSDARG00000099959	ENSDART00000169315
											ENSDARG00000099959	ENSDART00000172073
											ENSDARG00000099959	ENSDART00000161309
											ENSDARG00000099959	ENSDART00000167533
											ENSDARG00000099959	ENSDART00000172617
											ENSDARG00000099959	ENSDART00000171543
											ENSDARG00000040046	ENSDART00000058571
											ENSDARG00000104945	ENSDART00000158723
											ENSDARG00000070832	ENSDART00000104323
											ENSDARG00000024651	ENSDART00000128530
											ENSDARG00000024651	ENSDART00000102584
											ENSDARG00000024651	ENSDART00000148818
											ENSDARG00000024651	ENSDART00000149146
											ENSDARG00000011125	ENSDART00000011663
											ENSDARG00000062770	ENSDART00000091140
											ENSDARG00000014954	ENSDART00000009971
											ENSDARG00000014954	ENSDART00000132927
											ENSDARG00000105185	ENSDART00000168723
											ENSDARG00000105185	ENSDART00000162328
											ENSDARG00000105185	ENSDART00000164187
											ENSDARG00000074842	ENSDART00000157164
											ENSDARG00000074842	ENSDART00000109392
											ENSDARG00000025428	ENSDART00000033716
											ENSDARG00000104400	ENSDART00000164137
											ENSDARG00000026611	ENSDART00000037904
											ENSDARG00000026611	ENSDART00000153127
											ENSDARG00000043848	ENSDART00000064376
											ENSDARG00000043848	ENSDART00000135058
											ENSDARG00000070913	ENSDART00000104493
											ENSDARG00000003293	ENSDART00000005676
											ENSDARG00000003293	ENSDART00000127937
											ENSDARG00000021115	ENSDART00000134794
											ENSDARG00000021115	ENSDART00000140867
											ENSDARG00000021115	ENSDART00000137923
											ENSDARG00000029480	ENSDART00000137052
											ENSDARG00000029480	ENSDART00000047143
											ENSDARG00000004647	ENSDART00000012653
											ENSDARG00000010029	ENSDART00000016983
											ENSDARG00000023694	ENSDART00000137375
											ENSDARG00000023694	ENSDART00000031828
											ENSDARG00000041449	ENSDART00000060764
											ENSDARG00000008372	ENSDART00000045292
											ENSDARG00000008372	ENSDART00000123179
											ENSDARG00000008372	ENSDART00000165625
											ENSDARG00000030490	ENSDART00000145147
											ENSDARG00000030490	ENSDART00000040627
											ENSDARG00000067607	ENSDART00000092665
											ENSDARG00000104587	ENSDART00000159393
											ENSDARG00000104587	ENSDART00000165131
											ENSDARG00000104587	ENSDART00000158163
											ENSDARG00000104587	ENSDART00000171272
											ENSDARG00000092810	ENSDART00000056254
											ENSDARG00000057452	ENSDART00000080129
											ENSDARG00000003307	ENSDART00000155934
											ENSDARG00000003307	ENSDART00000154738
											ENSDARG00000003307	ENSDART00000002693
											ENSDARG00000000503	ENSDART00000081951
											ENSDARG00000000503	ENSDART00000163537
											ENSDARG00000029234	ENSDART00000098731
											ENSDARG00000086826	ENSDART00000130131
											ENSDARG00000102741	ENSDART00000157771
											ENSDARG00000102741	ENSDART00000166758
											ENSDARG00000063068	ENSDART00000148520
											ENSDARG00000063068	ENSDART00000148604
											ENSDARG00000063068	ENSDART00000091828
											ENSDARG00000043468	ENSDART00000143115
											ENSDARG00000043468	ENSDART00000063818
											ENSDARG00000075828	ENSDART00000152872
											ENSDARG00000075828	ENSDART00000114807
											ENSDARG00000067723	ENSDART00000148918
											ENSDARG00000103688	ENSDART00000167034
											ENSDARG00000004452	ENSDART00000139223
											ENSDARG00000004452	ENSDART00000141928
											ENSDARG00000004452	ENSDART00000126681
											ENSDARG00000004452	ENSDART00000027255
											ENSDARG00000013250	ENSDART00000034523
											ENSDARG00000013250	ENSDART00000157668
											ENSDARG00000013250	ENSDART00000051141
											ENSDARG00000013250	ENSDART00000167746
											ENSDARG00000092774	ENSDART00000147430
											ENSDARG00000092774	ENSDART00000165180
											ENSDARG00000006341	ENSDART00000173399
											ENSDARG00000006341	ENSDART00000021369
											ENSDARG00000044357	ENSDART00000065138
											ENSDARG00000044357	ENSDART00000126524
											ENSDARG00000031891	ENSDART00000144915
											ENSDARG00000031891	ENSDART00000040826
											ENSDARG00000036930	ENSDART00000103448
											ENSDARG00000006120	ENSDART00000122101
											ENSDARG00000006120	ENSDART00000005491
											ENSDARG00000024894	ENSDART00000037691
											ENSDARG00000024894	ENSDART00000114947
											ENSDARG00000024894	ENSDART00000037681
											ENSDARG00000024894	ENSDART00000162171
											ENSDARG00000004415	ENSDART00000153068
											ENSDARG00000004415	ENSDART00000009237
											ENSDARG00000004415	ENSDART00000122972
											ENSDARG00000004415	ENSDART00000005562
											ENSDARG00000004415	ENSDART00000031408
											ENSDARG00000004415	ENSDART00000125046
											ENSDARG00000004415	ENSDART00000133854
											ENSDARG00000004415	ENSDART00000145967
											ENSDARG00000004415	ENSDART00000128703
											ENSDARG00000004415	ENSDART00000121527
											ENSDARG00000053474	ENSDART00000142329
											ENSDARG00000053474	ENSDART00000009794
											ENSDARG00000053474	ENSDART00000136617
											ENSDARG00000059558	ENSDART00000149979
											ENSDARG00000059558	ENSDART00000082896
											ENSDARG00000040606	ENSDART00000149665
											ENSDARG00000040606	ENSDART00000150219
											ENSDARG00000059337	ENSDART00000082434
											ENSDARG00000059337	ENSDART00000152378
											ENSDARG00000059337	ENSDART00000149875
											ENSDARG00000017799	ENSDART00000149545
											ENSDARG00000093381	ENSDART00000167624
											ENSDARG00000093381	ENSDART00000142422
											ENSDARG00000093381	ENSDART00000131965
											ENSDARG00000078430	ENSDART00000143978
											ENSDARG00000078430	ENSDART00000131640
											ENSDARG00000078430	ENSDART00000138262
											ENSDARG00000078430	ENSDART00000110751
											ENSDARG00000078497	ENSDART00000112417
											ENSDARG00000078497	ENSDART00000161529
											ENSDARG00000043898	ENSDART00000064463
											ENSDARG00000023443	ENSDART00000092355
											ENSDARG00000023443	ENSDART00000136184
											ENSDARG00000023443	ENSDART00000137559
											ENSDARG00000023443	ENSDART00000115057
											ENSDARG00000023443	ENSDART00000018739
											ENSDARG00000023443	ENSDART00000170624
											ENSDARG00000023443	ENSDART00000162845
											ENSDARG00000042467	ENSDART00000130861
											ENSDARG00000042467	ENSDART00000123074
											ENSDARG00000042467	ENSDART00000147650
											ENSDARG00000010779	ENSDART00000006490
											ENSDARG00000010779	ENSDART00000141937
											ENSDARG00000040249	ENSDART00000149289
											ENSDARG00000040249	ENSDART00000130757
											ENSDARG00000057042	ENSDART00000079638
											ENSDARG00000057042	ENSDART00000157705
											ENSDARG00000057042	ENSDART00000113099
											ENSDARG00000055989	ENSDART00000078401
											ENSDARG00000014682	ENSDART00000020995
											ENSDARG00000102746	ENSDART00000171547
											ENSDARG00000102746	ENSDART00000168091
											ENSDARG00000102746	ENSDART00000164075
											ENSDARG00000102746	ENSDART00000170183
											ENSDARG00000102746	ENSDART00000165693
											ENSDARG00000102746	ENSDART00000160050
											ENSDARG00000102746	ENSDART00000169744
											ENSDARG00000102746	ENSDART00000168660
											ENSDARG00000102746	ENSDART00000160490
											ENSDARG00000038789	ENSDART00000056649
											ENSDARG00000015653	ENSDART00000158329
											ENSDARG00000015653	ENSDART00000172850
											ENSDARG00000015653	ENSDART00000169441
											ENSDARG00000015653	ENSDART00000020961
											ENSDARG00000015653	ENSDART00000115072
											ENSDARG00000038040	ENSDART00000055443
											ENSDARG00000038040	ENSDART00000140994
											ENSDARG00000038040	ENSDART00000172056
											ENSDARG00000068179	ENSDART00000098424
											ENSDARG00000069420	ENSDART00000127581
											ENSDARG00000020863	ENSDART00000111817
											ENSDARG00000020863	ENSDART00000105278
											ENSDARG00000076296	ENSDART00000142275
											ENSDARG00000076296	ENSDART00000132840
											ENSDARG00000042344	ENSDART00000062092
											ENSDARG00000075666	ENSDART00000054115
											ENSDARG00000001781	ENSDART00000138661
											ENSDARG00000055938	ENSDART00000078352
											ENSDARG00000007744	ENSDART00000135409
											ENSDARG00000007744	ENSDART00000052645
											ENSDARG00000007744	ENSDART00000149256
											ENSDARG00000007744	ENSDART00000162240
											ENSDARG00000043417	ENSDART00000063738
											ENSDARG00000005374	ENSDART00000009649
											ENSDARG00000078266	ENSDART00000114814
											ENSDARG00000041435	ENSDART00000060745
											ENSDARG00000013990	ENSDART00000155676
											ENSDARG00000013990	ENSDART00000155506
											ENSDARG00000013990	ENSDART00000124645
											ENSDARG00000063285	ENSDART00000123191
											ENSDARG00000028198	ENSDART00000026578
											ENSDARG00000058221	ENSDART00000047954
											ENSDARG00000059575	ENSDART00000082940
											ENSDARG00000101233	ENSDART00000157535
											ENSDARG00000040455	ENSDART00000059212
											ENSDARG00000007024	ENSDART00000146940
											ENSDARG00000007024	ENSDART00000024046
											ENSDARG00000007024	ENSDART00000133574
											ENSDARG00000016302	ENSDART00000162582
											ENSDARG00000016302	ENSDART00000021011
											ENSDARG00000007745	ENSDART00000006868
											ENSDARG00000029482	ENSDART00000086201
											ENSDARG00000029482	ENSDART00000166537
											ENSDARG00000029482	ENSDART00000171767
											ENSDARG00000040407	ENSDART00000152411
											ENSDARG00000040407	ENSDART00000059143
											ENSDARG00000077300	ENSDART00000134597
											ENSDARG00000077300	ENSDART00000168758
											ENSDARG00000053854	ENSDART00000126027
											ENSDARG00000053854	ENSDART00000075966
											ENSDARG00000023815	ENSDART00000134056
											ENSDARG00000023815	ENSDART00000028161
											ENSDARG00000023815	ENSDART00000129395
											ENSDARG00000070161	ENSDART00000137516
											ENSDARG00000070161	ENSDART00000134082
											ENSDARG00000070161	ENSDART00000102734
											ENSDARG00000073713	ENSDART00000156535
											ENSDARG00000075962	ENSDART00000110059
											ENSDARG00000075962	ENSDART00000142828
											ENSDARG00000075962	ENSDART00000143414
											ENSDARG00000075962	ENSDART00000167782
											ENSDARG00000075962	ENSDART00000153480
											ENSDARG00000058702	ENSDART00000081620
											ENSDARG00000012353	ENSDART00000122639
											ENSDARG00000012353	ENSDART00000166042
											ENSDARG00000059079	ENSDART00000152433
											ENSDARG00000059079	ENSDART00000082093
											ENSDARG00000101116	ENSDART00000167388
											ENSDARG00000018006	ENSDART00000152111
											ENSDARG00000018006	ENSDART00000045991
											ENSDARG00000045065	ENSDART00000066256
											ENSDARG00000045065	ENSDART00000153172
											ENSDARG00000076495	ENSDART00000147868
											ENSDARG00000006712	ENSDART00000011025
											ENSDARG00000014796	ENSDART00000099880
											ENSDARG00000071208	ENSDART00000105133
											ENSDARG00000005218	ENSDART00000004848
											ENSDARG00000007614	ENSDART00000150173
											ENSDARG00000007614	ENSDART00000150178
											ENSDARG00000035622	ENSDART00000124002
											ENSDARG00000035622	ENSDART00000124467
											ENSDARG00000035622	ENSDART00000139390
											ENSDARG00000035622	ENSDART00000051649
											ENSDARG00000005540	ENSDART00000145264
											ENSDARG00000005540	ENSDART00000027612
											ENSDARG00000005540	ENSDART00000172713
											ENSDARG00000099298	ENSDART00000167922
											ENSDARG00000099298	ENSDART00000166564
											ENSDARG00000099298	ENSDART00000162090
											ENSDARG00000099298	ENSDART00000172534
											ENSDARG00000099298	ENSDART00000164924
											ENSDARG00000068401	ENSDART00000098914
											ENSDARG00000040505	ENSDART00000059285
											ENSDARG00000040505	ENSDART00000132751
											ENSDARG00000040505	ENSDART00000142004
											ENSDARG00000044615	ENSDART00000065551
											ENSDARG00000044615	ENSDART00000151393
											ENSDARG00000006978	ENSDART00000102823
											ENSDARG00000006978	ENSDART00000156194
											ENSDARG00000077101	ENSDART00000113797
											ENSDARG00000007184	ENSDART00000140284
											ENSDARG00000007184	ENSDART00000134103
											ENSDARG00000007184	ENSDART00000007806
											ENSDARG00000075533	ENSDART00000109228
											ENSDARG00000090751	ENSDART00000129803
											ENSDARG00000090751	ENSDART00000155294
											ENSDARG00000090751	ENSDART00000156461
											ENSDARG00000103511	ENSDART00000159455
											ENSDARG00000103511	ENSDART00000170444
											ENSDARG00000103511	ENSDART00000172425
											ENSDARG00000075542	ENSDART00000135846
											ENSDARG00000075542	ENSDART00000112256
											ENSDARG00000061147	ENSDART00000086879
											ENSDARG00000040123	ENSDART00000141941
											ENSDARG00000040123	ENSDART00000151936
											ENSDARG00000040123	ENSDART00000104583
											ENSDARG00000040123	ENSDART00000058685
											ENSDARG00000101903	ENSDART00000168627
											ENSDARG00000070621	ENSDART00000091182
											ENSDARG00000070621	ENSDART00000162251
											ENSDARG00000070621	ENSDART00000103883
											ENSDARG00000070621	ENSDART00000136265
											ENSDARG00000104071	ENSDART00000169685
											ENSDARG00000104071	ENSDART00000166557
											ENSDARG00000030632	ENSDART00000042221
											ENSDARG00000013389	ENSDART00000014454
											ENSDARG00000022176	ENSDART00000131304
											ENSDARG00000022176	ENSDART00000101627
											ENSDARG00000022176	ENSDART00000029283
											ENSDARG00000021909	ENSDART00000036472
											ENSDARG00000001804	ENSDART00000014103
											ENSDARG00000010602	ENSDART00000018047
											ENSDARG00000038969	ENSDART00000056886
											ENSDARG00000074768	ENSDART00000168153
											ENSDARG00000074768	ENSDART00000106590
											ENSDARG00000074768	ENSDART00000172368
											ENSDARG00000040725	ENSDART00000139068
											ENSDARG00000067832	ENSDART00000097716
											ENSDARG00000091320	ENSDART00000144759
											ENSDARG00000091320	ENSDART00000129831
											ENSDARG00000008553	ENSDART00000155323
											ENSDARG00000008553	ENSDART00000024059
											ENSDARG00000008553	ENSDART00000122453
											ENSDARG00000069058	ENSDART00000100185
											ENSDARG00000077178	ENSDART00000124562
											ENSDARG00000077178	ENSDART00000106163
											ENSDARG00000077178	ENSDART00000152672
											ENSDARG00000077178	ENSDART00000152806
											ENSDARG00000077178	ENSDART00000162671
											ENSDARG00000102724	ENSDART00000159844
											ENSDARG00000068967	ENSDART00000099958
											ENSDARG00000040738	ENSDART00000023059
											ENSDARG00000100792	ENSDART00000165111
											ENSDARG00000100792	ENSDART00000163939
											ENSDARG00000062959	ENSDART00000091584
											ENSDARG00000074163	ENSDART00000103046
											ENSDARG00000074163	ENSDART00000144043
											ENSDARG00000074163	ENSDART00000131358
											ENSDARG00000068461	ENSDART00000143809
											ENSDARG00000068461	ENSDART00000111358
											ENSDARG00000068461	ENSDART00000133209
											ENSDARG00000068461	ENSDART00000139864
											ENSDARG00000068461	ENSDART00000134046
											ENSDARG00000068461	ENSDART00000167065
											ENSDARG00000016964	ENSDART00000016660
											ENSDARG00000079679	ENSDART00000113030
											ENSDARG00000079679	ENSDART00000168198
											ENSDARG00000079679	ENSDART00000161499
											ENSDARG00000079679	ENSDART00000160876
											ENSDARG00000079679	ENSDART00000157764
											ENSDARG00000052300	ENSDART00000074129
											ENSDARG00000075924	ENSDART00000166607
											ENSDARG00000075924	ENSDART00000151694
											ENSDARG00000075924	ENSDART00000111024
											ENSDARG00000039234	ENSDART00000057320
											ENSDARG00000044847	ENSDART00000157331
											ENSDARG00000044847	ENSDART00000106537
											ENSDARG00000044847	ENSDART00000164715
											ENSDARG00000044847	ENSDART00000065917
											ENSDARG00000058381	ENSDART00000048073
											ENSDARG00000058381	ENSDART00000145026
											ENSDARG00000058381	ENSDART00000145232
											ENSDARG00000087311	ENSDART00000100183
											ENSDARG00000087311	ENSDART00000160985
											ENSDARG00000087311	ENSDART00000172200
											ENSDARG00000105059	ENSDART00000171948
											ENSDARG00000070048	ENSDART00000102493
											ENSDARG00000070048	ENSDART00000173242
											ENSDARG00000070048	ENSDART00000172896
											ENSDARG00000098923	ENSDART00000158765
											ENSDARG00000076949	ENSDART00000112276
											ENSDARG00000104916	ENSDART00000169253
											ENSDARG00000104916	ENSDART00000170722
											ENSDARG00000088263	ENSDART00000156138
											ENSDARG00000088263	ENSDART00000128863
											ENSDARG00000088263	ENSDART00000168779
											ENSDARG00000099306	ENSDART00000166999
											ENSDARG00000099306	ENSDART00000173086
											ENSDARG00000099111	ENSDART00000158611
											ENSDARG00000099111	ENSDART00000168994
											ENSDARG00000078481	ENSDART00000152998
											ENSDARG00000088686	ENSDART00000172847
											ENSDARG00000088686	ENSDART00000110632
											ENSDARG00000100906	ENSDART00000123660
											ENSDARG00000086552	ENSDART00000172787
											ENSDARG00000086552	ENSDART00000127042
											ENSDARG00000098595	ENSDART00000173212
											ENSDARG00000098595	ENSDART00000158070
											ENSDARG00000105444	ENSDART00000147978
											ENSDARG00000029445	ENSDART00000143781
											ENSDARG00000029445	ENSDART00000048968
											ENSDARG00000042646	ENSDART00000142367
											ENSDARG00000042646	ENSDART00000132665
											ENSDARG00000042646	ENSDART00000154779
											ENSDARG00000042646	ENSDART00000062560
											ENSDARG00000088366	ENSDART00000105604
											ENSDARG00000088366	ENSDART00000133164
											ENSDARG00000088366	ENSDART00000165604
											ENSDARG00000100254	ENSDART00000158570
											ENSDARG00000043168	ENSDART00000034564
											ENSDARG00000077058	ENSDART00000140896
											ENSDARG00000031307	ENSDART00000114537
											ENSDARG00000031307	ENSDART00000045813
											ENSDARG00000095732	ENSDART00000142700
											ENSDARG00000095732	ENSDART00000138105
											ENSDARG00000103648	ENSDART00000167149
											ENSDARG00000103648	ENSDART00000164284
											ENSDARG00000103648	ENSDART00000160089
											ENSDARG00000103648	ENSDART00000170390
											ENSDARG00000063190	ENSDART00000092113

## Sheet: 10p0.01q_tiles_hypo
	chr	start	end	strand	pvalue	qvalue	meth.diff		GREAT gene list		Biomart conversion
10	1	37801	38100	*	4.84424e-10	1.97513e-07	-23.063				Ensembl	Gene
93	1	1215601	1215900	*	1.08885e-05	0.000862687	-12.9883		a1cf		ENSDARG00000002968	ENSDART00000152292
773	1	16978501	16978800	*	9.99499e-08	1.96944e-05	-10.7762		abhd17c		ENSDARG00000058452	ENSDART00000167273
2129	1	49454401	49454700	*	2.53644e-09	8.59652e-07	-14.8074		acanb		ENSDARG00000058452	ENSDART00000081323
2139	1	49607101	49607400	*	3.95558e-07	6.22148e-05	-19.8105		acy1		ENSDARG00000058452	ENSDART00000170655
3370	2	11668801	11669100	*	5.82651e-06	0.000532468	-10.0182		adamts9		ENSDARG00000045799	ENSDART00000149917
3772	2	19144201	19144500	*	6.07301e-06	0.000547574	-14.8794		adarb2		ENSDARG00000045799	ENSDART00000046249
3773	2	19167901	19168200	*	9.39029e-05	0.00447002	-10.5609		add1		ENSDARG00000038475	ENSDART00000056151
3916	2	22924201	22924500	*	1.59397e-05	0.00117019	-10.2396		adka		ENSDARG00000038475	ENSDART00000136550
4035	2	26773801	26774100	*	1.94323e-05	0.00136605	-14.9152		agbl4		ENSDARG00000038475	ENSDART00000125048
4212	2	32160901	32161200	*	9.78161e-08	1.94913e-05	-14.1049		aimp1		ENSDARG00000038475	ENSDART00000148720
4240	2	32877601	32877900	*	4.61627e-06	0.000447842	-15.0766		aktip		ENSDARG00000038475	ENSDART00000168711
4292	2	34033201	34033500	*	3.56436e-07	5.79531e-05	-15.0807		ano3		ENSDARG00000038475	ENSDART00000010824
4704	2	46549501	46549800	*	2.52627e-08	6.53188e-06	-23.7191		anxa6		ENSDARG00000038475	ENSDART00000169442
4814	2	49768501	49768800	*	1.01125e-06	0.000131053	-10.8304		appl2		ENSDARG00000077778	ENSDART00000109440
4851	2	50356801	50357100	*	9.20094e-05	0.00440443	-10.9422		arl10		ENSDARG00000077778	ENSDART00000138964
4977	2	52862401	52862700	*	0.000230465	0.0085831	-11.0845		armc8		ENSDARG00000071823	ENSDART00000139596
5011	2	53448901	53449200	*	2.22622e-12	1.63888e-09	-14.8328		ascl1a		ENSDARG00000071823	ENSDART00000158354
5149	2	55275601	55275900	*	5.70585e-06	0.000524153	-10.7415		asic2		ENSDARG00000103962	ENSDART00000160144
5153	2	55281601	55281900	*	7.83151e-12	4.66411e-09	-11.5013		atp11c		ENSDARG00000103962	ENSDART00000163608
5225	2	56126701	56127000	*	4.88076e-06	0.000466971	-10.5804		atp6v0cb		ENSDARG00000103962	ENSDART00000171131
5851	3	7065301	7065600	*	1.43697e-07	2.66293e-05	-10.239		atp7a		ENSDARG00000039429	ENSDART00000057605
6226	3	14014801	14015100	*	4.50442e-05	0.00257556	-12.3852		atp8a2		ENSDARG00000039429	ENSDART00000144227
6457	3	19654201	19654500	*	5.15339e-05	0.0028602	-10.4138		auts2		ENSDARG00000039429	ENSDART00000144989
6995	3	37215901	37216200	*	0	0	-22.5618		b3gat1		ENSDARG00000039429	ENSDART00000123596
7003	3	37682401	37682700	*	2.30038e-13	2.10225e-10	-16.1997		bai3		ENSDARG00000039429	ENSDART00000159585
7147	3	41912101	41912400	*	5.13775e-08	1.15392e-05	-15.9995		barx2		ENSDARG00000068050	ENSDART00000132908
7172	3	42591901	42592200	*	5.93232e-05	0.00319134	-10.518		bbip1		ENSDARG00000068050	ENSDART00000151746
7313	3	47289001	47289300	*	0.000106753	0.00487293	-10.3944		bcas3		ENSDARG00000068050	ENSDART00000132005
7671	3	55866901	55867200	*	1.92286e-05	0.00135353	-10.8674		bcl11aa		ENSDARG00000068050	ENSDART00000162011
7742	3	56880601	56880900	*	1.56541e-14	1.72863e-11	-17.5704		bmp1a		ENSDARG00000060036	ENSDART00000084184
7761	3	57126001	57126300	*	0.000153319	0.00638883	-11.2146		bmp2k		ENSDARG00000026862	ENSDART00000146202
7866	3	58246201	58246500	*	6.89132e-08	1.46109e-05	-18.1989		bmp5		ENSDARG00000026862	ENSDART00000029565
8242	4	464101	464400	*	1.21025e-05	0.000941978	-12.0671		bmp7a		ENSDARG00000026862	ENSDART00000136545
8653	4	8501701	8502000	*	1.72738e-05	0.00124232	-20.908		bmpr1bb		ENSDARG00000026862	ENSDART00000138893
8673	4	8829901	8830200	*	8.20034e-10	3.10468e-07	-19.4068		bmpr2b		ENSDARG00000026862	ENSDART00000138409
8738	4	10311601	10311900	*	8.89066e-06	0.000731747	-10.1371		bnip3la		ENSDARG00000058015	ENSDART00000155721
8769	4	11217601	11217900	*	1.19869e-08	3.4719e-06	-16.8315		btk		ENSDARG00000058015	ENSDART00000122213
8903	4	14720401	14720700	*	1.22782e-05	0.000948685	-12.2424		btr04		ENSDARG00000013335	ENSDART00000148882
8981	4	17212201	17212500	*	6.56359e-05	0.00344797	-14.3548		bub3		ENSDARG00000013335	ENSDART00000148807
8992	4	17499901	17500200	*	1.09666e-07	2.11374e-05	-23.1439		cacnb4b		ENSDARG00000013335	ENSDART00000006073
9660	4	41835901	41836200	*	7.28256e-08	1.53788e-05	-10.1765		calml4b		ENSDARG00000013335	ENSDART00000126260
10591	4	73857601	73857900	*	0.000163839	0.00669562	-11.3951		caln2		ENSDARG00000013335	ENSDART00000105346
10987	5	3509701	3510000	*	5.83206e-05	0.00314792	-14.9357		calrl		ENSDARG00000078139	ENSDART00000112853
11213	5	6829501	6829800	*	0.000169662	0.00685955	-10.9384		calub		ENSDARG00000078139	ENSDART00000172088
11397	5	10482601	10482900	*	0.000159122	0.00655336	-11.635		camta1a		ENSDARG00000060775	ENSDART00000086001
11514	5	14146201	14146500	*	0.000145207	0.00612791	-13.0806		caprin1b		ENSDARG00000060775	ENSDART00000139500
11662	5	18432601	18432900	*	2.65094e-05	0.00173675	-12.7368		ccdc153		ENSDARG00000060775	ENSDART00000141244
11677	5	19195201	19195500	*	5.47406e-06	0.00050993	-10.2422		ccdc170		ENSDARG00000060775	ENSDART00000140027
11795	5	23263501	23263800	*	5.3855e-08	1.1894e-05	-12.1352		ccnd1		ENSDARG00000062258	ENSDART00000133997
12296	5	38550601	38550900	*	4.37196e-07	6.77585e-05	-11.5261		ccnl1a		ENSDARG00000062258	ENSDART00000163095
12436	5	41722801	41723100	*	1.78678e-11	9.66403e-09	-17.7294		cdc5l		ENSDARG00000038386	ENSDART00000056005
12437	5	41723101	41723400	*	7.82086e-12	4.66411e-09	-19.2836		celf3b		ENSDARG00000006849	ENSDART00000137038
12444	5	41864401	41864700	*	4.66091e-05	0.00263942	-13.3622		cers3b		ENSDARG00000006849	ENSDART00000039517
12511	5	43822501	43822800	*	9.12292e-05	0.00437607	-19.5226		chmp1a		ENSDARG00000006849	ENSDART00000084803
12585	5	45960901	45961200	*	3.21763e-05	0.00197623	-14.6633		chrna3		ENSDARG00000036442	ENSDART00000167282
12638	5	47550601	47550900	*	0.000231564	0.0086133	-14.8663		chrnb1		ENSDARG00000036442	ENSDART00000052938
12690	5	49299301	49299600	*	3.95766e-05	0.00233201	-18.8761		cited4a		ENSDARG00000036442	ENSDART00000165463
13062	5	61332901	61333200	*	6.91127e-05	0.00359146	-10.3732		cldn2		ENSDARG00000036442	ENSDART00000165865
13063	5	61333201	61333500	*	0.000219808	0.00830423	-11.5743		cln5		ENSDARG00000036577	ENSDART00000053139
13433	5	67461601	67461900	*	2.18825e-13	2.0712e-10	-19.9648		cmasa		ENSDARG00000003699	ENSDART00000054977
13521	5	68856601	68856900	*	3.0318e-05	0.00189058	-19.9654		coa3		ENSDARG00000003699	ENSDART00000124072
13702	5	71444101	71444400	*	0.000105616	0.00484686	-11.4933		coasy		ENSDARG00000077492	ENSDART00000109848
13703	5	71444401	71444700	*	0.000106463	0.00486921	-13.2215		coro1b		ENSDARG00000077492	ENSDART00000152093
13729	5	71673901	71674200	*	2.23741e-08	5.87095e-06	-13.08		cpeb1a		ENSDARG00000077492	ENSDART00000153695
14019	6	3987301	3987600	*	0.000112335	0.00504601	-10.069		cps1		ENSDARG00000041098	ENSDART00000138806
14044	6	4254001	4254300	*	3.94519e-05	0.00232865	-12.4541		crispld1a		ENSDARG00000071046	ENSDART00000146280
14046	6	4261801	4262100	*	5.62861e-08	1.22774e-05	-18.4679		crls1		ENSDARG00000090764	ENSDART00000149957
14196	6	6737101	6737400	*	0	0	-28.4433		crygmxl1		ENSDARG00000090764	ENSDART00000079294
14431	6	11675101	11675400	*	6.45199e-05	0.00340324	-12.1839		csnk1g2b		ENSDARG00000090764	ENSDART00000077172
14454	6	12107101	12107400	*	7.24449e-10	2.80285e-07	-12.6001		csrnp1b		ENSDARG00000061352	ENSDART00000087426
14459	6	12185101	12185400	*	0.000238626	0.00877134	-10.9857		cx39.4		ENSDARG00000061352	ENSDART00000132521
14571	6	14650501	14650800	*	0.000215141	0.00818039	-13.8813		cxcl14		ENSDARG00000028071	ENSDART00000127875
14618	6	15582901	15583200	*	4.22638e-07	6.56942e-05	-16.3485		cxcr4b		ENSDARG00000020009	ENSDART00000006079
15120	6	25750501	25750800	*	0.000233038	0.0086378	-10.119		cxcr7b		ENSDARG00000020009	ENSDART00000166657
15394	6	32989801	32990100	*	1.39555e-12	1.10404e-09	-13.8471		cyth3		ENSDARG00000101701	ENSDART00000161162
15944	6	50074201	50074500	*	1.55612e-06	0.000187033	-12.5864		dapk1		ENSDARG00000018260	ENSDART00000016472
16354	6	56894701	56895000	*	1.63421e-11	9.023e-09	-17.1822		dbr1		ENSDARG00000018260	ENSDART00000143942
17096	7	8790301	8790600	*	2.10867e-06	0.000236799	-18.4182		ddx27		ENSDARG00000075729	ENSDART00000114261
17191	7	10408801	10409100	*	1.92845e-07	3.4504e-05	-10.8288		dhdhl		ENSDARG00000102742	ENSDART00000159412
17272	7	12124501	12124800	*	1.07244e-09	3.89344e-07	-15.4402		dhrs13a.3		ENSDARG00000020057	ENSDART00000125961
17307	7	12528001	12528300	*	4.46719e-05	0.00255703	-13.4912		diabloa		ENSDARG00000020057	ENSDART00000137937
17442	7	15885301	15885600	*	4.13825e-06	0.000409992	-13.3542		diaph2		ENSDARG00000025468	ENSDART00000035676
17527	7	18321901	18322200	*	5.99685e-05	0.00321071	-11.3574		dlgap1b		ENSDARG00000004433	ENSDART00000148737
17655	7	22221901	22222200	*	5.84687e-06	0.000533409	-11.9383		dlgap3		ENSDARG00000075883	ENSDART00000153244
18037	7	35464501	35464800	*	4.75851e-07	7.22701e-05	-10.3397		dmgdh		ENSDARG00000075883	ENSDART00000153283
18055	7	35901301	35901600	*	1.16092e-05	0.000912968	-13.6533		dnaja2l		ENSDARG00000062174	ENSDART00000089577
18192	7	40997401	40997700	*	3.9968e-15	4.92671e-12	-15.7524		dnajc27		ENSDARG00000062174	ENSDART00000149177
18623	7	54436501	54436800	*	0.000104577	0.00482038	-14.2632		dock1		ENSDARG00000062174	ENSDART00000122023
19478	7	73704901	73705200	*	7.66054e-14	7.96163e-11	-11.3556		dohh		ENSDARG00000062174	ENSDART00000089564
19857	8	5091901	5092200	*	2.06912e-05	0.00143739	-10.5176		dpf1		ENSDARG00000062174	ENSDART00000171643
20161	8	10754101	10754400	*	8.57844e-07	0.000113959	-15.7752		dph1		ENSDARG00000062174	ENSDART00000162696
20203	8	11920201	11920500	*	8.88178e-16	1.20711e-12	-18.8372		dpyda		ENSDARG00000062174	ENSDART00000159646
20336	8	15575401	15575700	*	3.50503e-06	0.000357274	-15.3547		dync1li1		ENSDARG00000059347	ENSDART00000157163
20501	8	20718901	20719200	*	0.000143243	0.00609353	-10.1114		edil3		ENSDARG00000059347	ENSDART00000156532
20610	8	23497501	23497800	*	2.33119e-05	0.00157205	-19.5429		efcab2		ENSDARG00000059347	ENSDART00000156062
20712	8	26572201	26572500	*	1.2215e-05	0.000947947	-12.1293		efna2		ENSDARG00000059347	ENSDART00000082447
20862	8	30112801	30113100	*	8.43207e-11	4.02647e-08	-14.7075		egln3		ENSDARG00000069766	ENSDART00000141149
20998	8	34099201	34099500	*	0.000205483	0.00789812	-13.1447		eif1b		ENSDARG00000005115	ENSDART00000005405
21879	8	51024901	51025200	*	0.000174096	0.00698554	-10.6907		eif2b1		ENSDARG00000005115	ENSDART00000148485
22767	9	10556101	10556400	*	9.76191e-05	0.00459118	-15.2433		eif2b3		ENSDARG00000005115	ENSDART00000127138
22853	9	13056601	13056900	*	2.77767e-05	0.00179289	-15.4733		eif2s2		ENSDARG00000077428	ENSDART00000146633
23041	9	17000701	17001000	*	1.46094e-06	0.000177606	-10.3756		eif4e1b		ENSDARG00000077428	ENSDART00000046059
23233	9	22224301	22224600	*	7.98183e-08	1.65263e-05	-14.7842		emx2		ENSDARG00000054272	ENSDART00000098889
23419	9	28060801	28061100	*	1.39021e-11	7.92338e-09	-11.3275		epb41l4a		ENSDARG00000054272	ENSDART00000145383
23747	9	39356701	39357000	*	8.32405e-05	0.0041043	-10.8691		epor		ENSDARG00000054272	ENSDART00000143016
23846	9	42282301	42282600	*	3.59985e-07	5.81732e-05	-11.0672		eprs		ENSDARG00000054272	ENSDART00000139519
23967	9	45996601	45996900	*	3.65401e-08	8.76688e-06	-21.2903		erbb4b		ENSDARG00000077161	ENSDART00000110360
24293	9	52182601	52182900	*	4.80603e-08	1.09331e-05	-17.043		esrrb		ENSDARG00000077161	ENSDART00000155139
24641	10	847801	848100	*	1.21389e-05	0.000943425	-11.9645		esrrga		ENSDARG00000016161	ENSDART00000156771
24691	10	1750201	1750500	*	4.33182e-05	0.00250388	-12.6383		etnk1		ENSDARG00000016161	ENSDART00000157184
24724	10	2269501	2269800	*	3.26091e-07	5.3678e-05	-17.3989		exoc3		ENSDARG00000016161	ENSDART00000041211
25053	10	7515901	7516200	*	6.29162e-05	0.00333485	-12.2716		ezrb		ENSDARG00000101637	ENSDART00000165320
25171	10	9845401	9845700	*	3.38552e-08	8.19397e-06	-15.5057		fah		ENSDARG00000101637	ENSDART00000170774
25370	10	13305601	13305900	*	2.77279e-06	0.000298801	-13.5136		fam154b		ENSDARG00000101637	ENSDART00000162795
25569	10	18104401	18104700	*	1.23232e-06	0.00015515	-22.6721		fam167aa		ENSDARG00000101637	ENSDART00000171395
25608	10	19146601	19146900	*	0.000181354	0.00722209	-12.4695		fam172a		ENSDARG00000101637	ENSDART00000163748
25629	10	20027401	20027700	*	0	0	-13.4015		fam204a		ENSDARG00000055124	ENSDART00000141027
25647	10	20796001	20796300	*	5.12512e-12	3.27295e-09	-19.2003		fam222a		ENSDARG00000055124	ENSDART00000077435
25679	10	21699301	21699600	*	1.40642e-09	4.93688e-07	-10.3253		fam49ba		ENSDARG00000055124	ENSDART00000139696
25773	10	24369301	24369600	*	2.91066e-06	0.000311044	-11.9921		fancc		ENSDARG00000055124	ENSDART00000136692
25887	10	27644401	27644700	*	0.000240091	0.00878368	-13.4827		fancl		ENSDARG00000055124	ENSDART00000134284
26353	10	39210001	39210300	*	1.98015e-05	0.00138648	-13.1468		fbxl14a		ENSDARG00000055124	ENSDART00000126563
26633	10	43761001	43761300	*	1.07267e-07	2.08266e-05	-13.9342		fbxl14b		ENSDARG00000043797	ENSDART00000064313
26984	11	3142201	3142500	*	3.23108e-12	2.22418e-09	-17.9417		fgf11a		ENSDARG00000043797	ENSDART00000121806
27248	11	7077301	7077600	*	2.49937e-08	6.49403e-06	-20.0943		flncb		ENSDARG00000006983	ENSDART00000148426
27322	11	8633701	8634000	*	8.51132e-05	0.00415031	-11.6184		flot2a		ENSDARG00000006983	ENSDART00000024206
27716	11	17969101	17969400	*	5.98142e-08	1.28357e-05	-12.5693		flot2b		ENSDARG00000036337	ENSDART00000052792
27761	11	18960001	18960300	*	7.57183e-12	4.61312e-09	-12.9223		fmnl1a		ENSDARG00000036337	ENSDART00000132420
27841	11	21510901	21511200	*	1.41613e-05	0.00106621	-12.0416		fmnl3		ENSDARG00000036337	ENSDART00000172404
28177	11	31932901	31933200	*	4.65932e-05	0.00263942	-11.7727		fmr1		ENSDARG00000102643	ENSDART00000171602
28560	11	39390601	39390900	*	3.58702e-06	0.000362149	-10.1149		foxg1b		ENSDARG00000102643	ENSDART00000169192
28626	11	40486801	40487100	*	3.91341e-05	0.00231505	-10.5419		foxn3		ENSDARG00000102643	ENSDART00000164390
28727	11	41691301	41691600	*	5.41336e-08	1.19059e-05	-13.0887		foxp1a		ENSDARG00000100991	ENSDART00000160975
28791	11	42743701	42744000	*	7.89882e-05	0.00395722	-10.6085		foxp4		ENSDARG00000100991	ENSDART00000159299
28922	11	44472301	44472600	*	2.08826e-05	0.00144689	-16.5674		frem1b		ENSDARG00000069660	ENSDART00000101528
29058	12	1581901	1582200	*	0.00025984	0.00932477	-11.5361		fscn2a		ENSDARG00000069660	ENSDART00000149774
29183	12	3642001	3642300	*	4.11694e-10	1.72394e-07	-11.1123		fzd7a		ENSDARG00000035990	ENSDART00000133059
29338	12	6144301	6144600	*	5.67849e-06	0.000524153	-12.3439		g3bp1		ENSDARG00000044387	ENSDART00000065183
29808	12	15317401	15317700	*	4.06873e-06	0.000406142	-10.0335		gabrb2		ENSDARG00000057334	ENSDART00000124189
29833	12	15919501	15919800	*	2.48837e-06	0.000273074	-13.7915		gapvd1		ENSDARG00000057334	ENSDART00000131666
29925	12	17417101	17417400	*	1.03297e-07	2.01294e-05	-18.641		gbgt1l2		ENSDARG00000057334	ENSDART00000158094
30245	12	27088501	27088800	*	0.000113926	0.00509587	-14.3146		gfra2b		ENSDARG00000057334	ENSDART00000079968
30804	12	43202701	43203000	*	1.52136e-11	8.48832e-09	-10.5671		gla		ENSDARG00000042747	ENSDART00000062736
31135	12	49188301	49188600	*	8.12124e-07	0.000108978	-12.6666		glis3		ENSDARG00000042747	ENSDART00000148868
31296	13	1798801	1799100	*	9.41639e-11	4.42698e-08	-16.8449		glra1		ENSDARG00000008660	ENSDART00000021559
31437	13	3526801	3527100	*	2.19845e-05	0.00149587	-16.662		glsa		ENSDARG00000045932	ENSDART00000104755
31592	13	5706901	5707200	*	8.70935e-06	0.000721287	-15.2945		glula		ENSDARG00000045932	ENSDART00000158463
31892	13	11903401	11903700	*	8.79846e-08	1.77999e-05	-15.5787		gna11b		ENSDARG00000045932	ENSDART00000164113
32081	13	15926101	15926400	*	3.8079e-06	0.000382265	-13.1561		gng2		ENSDARG00000020028	ENSDART00000004742
32250	13	19407901	19408200	*	4.89426e-08	1.10862e-05	-12.5742		gpc1b		ENSDARG00000020028	ENSDART00000164407
32330	13	22339801	22340100	*	2.44903e-06	0.000269314	-15.4266		gpd2		ENSDARG00000077275	ENSDART00000138227
32411	13	24951301	24951600	*	3.93664e-05	0.0023262	-17.0284		gphnb		ENSDARG00000077275	ENSDART00000113859
32445	13	25894501	25894800	*	0.0001233	0.00540122	-10.7008		greb1		ENSDARG00000038000	ENSDART00000055385
32686	13	32329801	32330100	*	3.94309e-06	0.000394342	-13.0296		grik4		ENSDARG00000018797	ENSDART00000101944
32907	13	38613601	38613900	*	0.000191272	0.00749693	-10.7317		hamp1		ENSDARG00000034056	ENSDART00000138794
33923	14	3531901	3532200	*	0.000117133	0.00519545	-12.6431		hapln1a		ENSDARG00000034056	ENSDART00000021683
34974	14	19991101	19991400	*	4.08728e-06	0.000406463	-11.2061		hapln3		ENSDARG00000034056	ENSDART00000100328
34978	14	20123101	20123400	*	0.000219647	0.00830406	-13.7772		hcn4		ENSDARG00000038429	ENSDART00000109107
35040	14	21968401	21968700	*	0.000121982	0.00537009	-12.2106		hddc2		ENSDARG00000038429	ENSDART00000133889
35115	14	24138301	24138600	*	1.18648e-06	0.000150092	-11.7792		helt		ENSDARG00000038429	ENSDART00000135405
35152	14	25602001	25602300	*	1.66562e-06	0.000197265	-15.5848		hey2		ENSDARG00000038429	ENSDART00000056082
35173	14	26413201	26413500	*	9.50275e-05	0.00451443	-17.1985		hic1		ENSDARG00000038429	ENSDART00000158952
35341	14	32274301	32274600	*	0.00020599	0.00790616	-10.0711		hnmt		ENSDARG00000070357	ENSDART00000103155
35542	14	38593501	38593800	*	3.71836e-08	8.87793e-06	-21.0194		hoxb1b		ENSDARG00000056627	ENSDART00000125923
35559	14	39114901	39115200	*	0.000105534	0.00484686	-13.9248		hs3st2		ENSDARG00000041959	ENSDART00000061499
36125	14	50321701	50322000	*	3.75457e-07	5.99425e-05	-11.094		hspb1		ENSDARG00000060093	ENSDART00000124059
36214	14	51549901	51550200	*	0.00023059	0.0085831	-10.8892		ids		ENSDARG00000060093	ENSDART00000136642
36636	15	5106301	5106600	*	8.40466e-05	0.00412692	-13.9394		ikzf1		ENSDARG00000056923	ENSDART00000079502
36651	15	5318401	5318700	*	6.95719e-05	0.00360793	-10.7376		im:6904045		ENSDARG00000091831	ENSDART00000128065
36868	15	10299601	10299900	*	0.000210151	0.00803677	-18.27		im:7140055		ENSDARG00000028336	ENSDART00000032392
36887	15	10850101	10850400	*	0.000115733	0.00516359	-10.4889		im:7143923		ENSDARG00000041137	ENSDART00000060304
37016	15	12853201	12853500	*	1.61593e-12	1.24133e-09	-27.2751		im:7151068		ENSDARG00000041137	ENSDART00000152620
37062	15	14313601	14313900	*	0	0	-24.6383		im:7154842		ENSDARG00000104172	ENSDART00000163066
37168	15	16430701	16431000	*	1.24256e-12	9.979e-10	-13.9826		immp1l		ENSDARG00000104172	ENSDART00000162266
37300	15	19613701	19614000	*	4.00982e-07	6.28812e-05	-13.1261		inhbaa		ENSDARG00000104172	ENSDART00000167213
37397	15	21806701	21807000	*	8.08242e-14	8.23856e-11	-17.0566		inpp5k		ENSDARG00000104172	ENSDART00000164119
37443	15	23086801	23087100	*	7.12615e-06	0.000624757	-10.8588		ints2		ENSDARG00000076060	ENSDART00000147443
37521	15	25731001	25731300	*	3.80848e-05	0.00226055	-10.4891		irf2bp2b		ENSDARG00000076060	ENSDART00000103298
37542	15	26465401	26465700	*	2.32107e-07	4.04695e-05	-15.0175		irx1a		ENSDARG00000037415	ENSDART00000142971
37563	15	27033601	27033900	*	6.45276e-05	0.00340324	-10.5172		irx2a		ENSDARG00000037415	ENSDART00000054452
37608	15	28043701	28044000	*	1.67628e-07	3.05328e-05	-16.5498		irx5a		ENSDARG00000037415	ENSDART00000163819
37707	15	30764701	30765000	*	0.000150666	0.00629809	-15.1367		itga11b		ENSDARG00000055459	ENSDART00000103151
37728	15	31140301	31140600	*	5.87364e-07	8.38413e-05	-18.7294		jkamp		ENSDARG00000055459	ENSDART00000164035
37944	15	36921001	36921300	*	8.52973e-05	0.00415546	-10.2323		kat6b		ENSDARG00000025703	ENSDART00000170452
37969	15	37519501	37519800	*	2.24602e-05	0.00152432	-17.2455		kcnd2		ENSDARG00000025703	ENSDART00000007672
38634	16	665101	665400	*	0	0	-31.2069		kcnip3b		ENSDARG00000010745	ENSDART00000018735
38635	16	665401	665700	*	1.28361e-06	0.000160465	-14.6845		kcnj8		ENSDARG00000070916	ENSDART00000154580
38636	16	672001	672300	*	7.91674e-06	0.000669256	-12.8219		kcnk5a		ENSDARG00000070916	ENSDART00000123114
38672	16	1102201	1102500	*	3.63259e-05	0.0021722	-10.8753		kctd5		ENSDARG00000099093	ENSDART00000169481
40068	16	29481301	29481600	*	5.28947e-07	7.76637e-05	-11.1723		kiaa0586		ENSDARG00000099093	ENSDART00000162888
40612	16	44074801	44075100	*	1.50811e-06	0.000182088	-13.7563		kirrel3l		ENSDARG00000003564	ENSDART00000018515
40986	16	50728801	50729100	*	0.000165985	0.00677285	-12.2401		kmt2bb		ENSDARG00000099927	ENSDART00000171642
41562	17	3084301	3084600	*	1.9185e-07	3.4471e-05	-14.173		ldb3a		ENSDARG00000099927	ENSDART00000164028
41715	17	4869301	4869600	*	2.7727e-10	1.20464e-07	-10.7436		lfng		ENSDARG00000099927	ENSDART00000160675
41722	17	4970401	4970700	*	1.83221e-07	3.30325e-05	-11.2752		lgals3l		ENSDARG00000057973	ENSDART00000140214
41775	17	5602501	5602800	*	1.08127e-05	0.000857965	-15.1599		lhfpl2a		ENSDARG00000057973	ENSDART00000152243
41858	17	7131901	7132200	*	4.85321e-09	1.57817e-06	-17.6384		lhx1a		ENSDARG00000098317	ENSDART00000163359
41898	17	7783201	7783500	*	4.5796e-07	7.03436e-05	-17.2316		lhx8a		ENSDARG00000098317	ENSDART00000167951
41991	17	9550201	9550500	*	3.28681e-05	0.00200679	-15.1376		lingo1a		ENSDARG00000098317	ENSDART00000168667
42064	17	10768201	10768500	*	7.37621e-06	0.000637802	-10.898		lmbrd1		ENSDARG00000093413	ENSDART00000133240
42112	17	11724001	11724300	*	1.71218e-06	0.000200781	-18.3707		lmo4b		ENSDARG00000093413	ENSDART00000168038
42179	17	13763401	13763700	*	6.01122e-05	0.00321231	-16.6905		lmx1bb		ENSDARG00000074323	ENSDART00000155660
42183	17	13902001	13902300	*	1.0293e-05	0.000822888	-14.7053		lrmp		ENSDARG00000074323	ENSDART00000113669
42275	17	16707301	16707600	*	9.00635e-07	0.000118456	-13.7791		lrp2bp		ENSDARG00000032553	ENSDART00000149640
42697	17	30052501	30052800	*	1.41879e-08	3.96672e-06	-11.2888		lrrc3		ENSDARG00000032553	ENSDART00000150063
42816	17	33276601	33276900	*	8.9873e-08	1.81128e-05	-17.9936		lrrtm4l1		ENSDARG00000012688	ENSDART00000132874
42817	17	33276901	33277200	*	7.45047e-11	3.65656e-08	-16.5636		maf		ENSDARG00000012688	ENSDART00000151582
43015	17	39501601	39501900	*	3.2844e-06	0.00034337	-10.6968		map1lc3c		ENSDARG00000012688	ENSDART00000151383
43072	17	41058901	41059200	*	0.00021785	0.0082597	-10.6383		mapk13		ENSDARG00000091402	ENSDART00000011192
43173	17	43134301	43134600	*	8.93127e-07	0.000118054	-11.4924		mcf2a		ENSDARG00000091402	ENSDART00000170885
43249	17	45609301	45609600	*	1.89634e-08	5.07649e-06	-15.0673		med27		ENSDARG00000018106	ENSDART00000020786
43377	17	48567601	48567900	*	2.97177e-05	0.00186853	-10.052		mef2ca		ENSDARG00000018106	ENSDART00000132274
43587	17	51375601	51375900	*	8.30247e-05	0.00410129	-10.3299		mef2cb		ENSDARG00000053047	ENSDART00000075009
43660	17	52253101	52253400	*	4.22425e-06	0.000417166	-11.4562		meis1		ENSDARG00000014565	ENSDART00000017881
43875	18	1236001	1236300	*	0.000150457	0.00629434	-10.3032		mettl21d		ENSDARG00000039701	ENSDART00000058036
44213	18	6936601	6936900	*	5.15816e-10	2.08707e-07	-17.7833		micall2a		ENSDARG00000040087	ENSDART00000123842
44233	18	7345501	7345800	*	1.42926e-05	0.00107305	-15.8231		mmp16a		ENSDARG00000040087	ENSDART00000058627
44575	18	17795701	17796000	*	1.7195e-08	4.67391e-06	-20.184		mob2b		ENSDARG00000040087	ENSDART00000164868
44832	18	25743901	25744200	*	6.36887e-07	9.00211e-05	-10.8914		mrps23		ENSDARG00000090834	ENSDART00000143904
44929	18	28504801	28505100	*	9.50807e-06	0.000769421	-25.5955		msi2b		ENSDARG00000090834	ENSDART00000161710
44930	18	28505101	28505400	*	0	0	-14.7328		mvk		ENSDARG00000060494	ENSDART00000154357
45394	18	36466201	36466500	*	0.000104792	0.00482159	-12.2883		mxf		ENSDARG00000060494	ENSDART00000075743
45476	18	38290201	38290500	*	9.00391e-14	9.00468e-11	-12.269		mycb		ENSDARG00000089536	ENSDART00000163635
45593	18	41375101	41375400	*	4.73179e-05	0.00267384	-11.9155		mycbp2		ENSDARG00000089536	ENSDART00000126766
45671	18	43156201	43156500	*	9.85842e-05	0.00462017	-14.7569		myt1b		ENSDARG00000004861	ENSDART00000009104
46071	18	49497901	49498200	*	1.32098e-07	2.46542e-05	-13.0594		naa50		ENSDARG00000004861	ENSDART00000126966
46146	18	50699401	50699700	*	5.01531e-08	1.13121e-05	-20.8075		nab1a		ENSDARG00000019420	ENSDART00000017726
46528	19	5590801	5591100	*	0.000157868	0.00652198	-11.7114		nap1l4a		ENSDARG00000019420	ENSDART00000143208
46651	19	8051401	8051700	*	3.30734e-07	5.42737e-05	-15.6812		napgl		ENSDARG00000014582	ENSDART00000139686
46970	19	15759601	15759900	*	5.35566e-05	0.00293866	-12.3094		nek7		ENSDARG00000014582	ENSDART00000009347
47179	19	19421401	19421700	*	0.000205064	0.00789397	-10.8535		nfia		ENSDARG00000014582	ENSDART00000145309
47724	19	33906301	33906600	*	9.10904e-10	3.37637e-07	-23.1728		nfil3-6		ENSDARG00000025091	ENSDART00000078893
47846	19	37632901	37633200	*	3.53195e-05	0.00212738	-11.6261		nlgn1		ENSDARG00000025091	ENSDART00000125218
48184	19	44677501	44677800	*	9.79258e-07	0.000127531	-19.5668		nog2		ENSDARG00000025091	ENSDART00000152499
48192	19	44724001	44724300	*	0	0	-10.0944		nop16		ENSDARG00000101762	ENSDART00000166064
48197	19	44775301	44775600	*	0.00020379	0.00786917	-13.346		npc2		ENSDARG00000067665	ENSDART00000097455
49340	20	13656301	13656600	*	0	0	-19.5432		nphs1		ENSDARG00000067665	ENSDART00000159901
50151	20	39735601	39735900	*	4.94477e-06	0.000472244	-21.3664		npnt		ENSDARG00000052697	ENSDART00000135954
50275	20	43514701	43515000	*	1.12612e-06	0.00014383	-13.0376		nr2f1a		ENSDARG00000052697	ENSDART00000074599
50644	20	51041701	51042000	*	6.24054e-09	1.9807e-06	-23.4319		nrg1		ENSDARG00000039699	ENSDART00000137057
50925	21	118201	118500	*	1.29277e-08	3.68401e-06	-15.1072		nrp1a		ENSDARG00000039699	ENSDART00000058032
51021	21	1418401	1418700	*	1.50324e-05	0.00112065	-12.9058		nrxn2a		ENSDARG00000039699	ENSDART00000168771
51162	21	2696401	2696700	*	2.31307e-05	0.00156382	-11.4976		nxnl2		ENSDARG00000090797	ENSDART00000131924
52142	21	25894801	25895100	*	3.06722e-06	0.000325153	-11.7378		odz4		ENSDARG00000020929	ENSDART00000039717
52218	21	27843301	27843600	*	1.29429e-07	2.42414e-05	-14.383		opn4a		ENSDARG00000020929	ENSDART00000141418
52603	21	36918301	36918600	*	2.5463e-09	8.59652e-07	-11.5996		oprl1		ENSDARG00000020929	ENSDART00000145648
52669	21	37977901	37978200	*	2.66025e-08	6.7791e-06	-19.0016		or120-1		ENSDARG00000020929	ENSDART00000133591
53717	22	7761601	7761900	*	7.60072e-05	0.00383323	-16.5813		ostf1		ENSDARG00000020929	ENSDART00000146452
53933	22	12843001	12843300	*	6.66418e-07	9.29557e-05	-13.1332		oxr1a		ENSDARG00000020929	ENSDART00000145704
54082	22	16839901	16840200	*	0.000222372	0.00837363	-13.3647		p2rx8		ENSDARG00000020929	ENSDART00000159843
54096	22	17025001	17025300	*	0.000144579	0.00611111	-15.6541		pa2g4b		ENSDARG00000020929	ENSDART00000056621
54360	22	23111401	23111700	*	4.15773e-05	0.00242036	-17.7722		paqr3a		ENSDARG00000055232	ENSDART00000135964
54602	22	29707501	29707800	*	2.94527e-06	0.000313479	-13.4579		park2		ENSDARG00000055232	ENSDART00000133717
54820	22	33697201	33697500	*	5.5135e-06	0.000512703	-17.6		pax7a		ENSDARG00000055232	ENSDART00000099027
55013	22	36284101	36284400	*	1.8098e-05	0.00129109	-11.9257		pax8		ENSDARG00000055232	ENSDART00000077554
55052	22	36850201	36850500	*	4.34725e-05	0.00250581	-10.653		pbx1a		ENSDARG00000007885	ENSDART00000020946
55343	23	1791001	1791300	*	1.88209e-05	0.00133547	-14.4906		pcbp3		ENSDARG00000007885	ENSDART00000142483
55793	23	7968301	7968600	*	1.84289e-05	0.00131293	-16.6747		pcdh19		ENSDARG00000007885	ENSDART00000131283
55796	23	8049301	8049600	*	6.98035e-07	9.59167e-05	-15.0637		pcdh1a		ENSDARG00000034497	ENSDART00000109520
55802	23	8115301	8115600	*	8.96832e-05	0.00432147	-12.0413		pcdh1g2		ENSDARG00000045801	ENSDART00000067322
55911	23	10155601	10155900	*	0.000180081	0.00719302	-13.2105		pcnxl3		ENSDARG00000069662	ENSDART00000144375
55936	23	10680601	10680900	*	1.5724e-05	0.00115756	-11.346		pdcd4b		ENSDARG00000069662	ENSDART00000137535
56015	23	12678601	12678900	*	1.93336e-07	3.4504e-05	-10.1518		pdgfrb		ENSDARG00000069662	ENSDART00000101530
56016	23	12679501	12679800	*	0	0	-17.4375		pdhx		ENSDARG00000018820	ENSDART00000134286
56038	23	12931501	12931800	*	0	0	-10.7613		pfkpa		ENSDARG00000018820	ENSDART00000026492
56494	23	25397701	25398000	*	0	0	-30.7633		pgam5		ENSDARG00000004830	ENSDART00000003947
56586	23	28765501	28765800	*	2.44249e-15	3.23658e-12	-10.9625		pgm2l1		ENSDARG00000004830	ENSDART00000148852
56657	23	30603601	30603900	*	6.87929e-05	0.00358186	-18.3626		phlda2		ENSDARG00000004830	ENSDART00000149413
56796	23	34436101	34436400	*	0.000104752	0.00482159	-12.6852		pi15a		ENSDARG00000004830	ENSDART00000161586
57581	24	963601	963900	*	0.000186136	0.00736271	-11.9776		pitpnab		ENSDARG00000004830	ENSDART00000165876
57649	24	2171101	2171400	*	1.01186e-05	0.000811398	-14.9087		plk4		ENSDARG00000069774	ENSDART00000101157
57687	24	3203701	3204000	*	8.66246e-06	0.000721287	-10.7566		plxdc1		ENSDARG00000069774	ENSDART00000101789
57710	24	3759601	3759900	*	5.43151e-05	0.00296188	-10.5941		plxnb1a		ENSDARG00000055713	ENSDART00000151144
57715	24	3853501	3853800	*	1.10913e-10	5.11206e-08	-23.6319		plxnb2b		ENSDARG00000004372	ENSDART00000147440
57978	24	9097801	9098100	*	8.25594e-08	1.69613e-05	-12.4464		pnn		ENSDARG00000004372	ENSDART00000144554
58067	24	11798101	11798400	*	1.96509e-05	0.00137776	-11.0125		polr2b		ENSDARG00000004372	ENSDART00000109023
58203	24	14682301	14682600	*	3.32304e-09	1.10085e-06	-13.7271		polr2gl		ENSDARG00000037433	ENSDART00000123434
58388	24	19476301	19476600	*	1.90073e-05	0.00134151	-13.1265		pomca		ENSDARG00000037433	ENSDART00000054476
58436	24	21042301	21042600	*	9.78101e-05	0.00459608	-15.2128		pomgnt1		ENSDARG00000037433	ENSDART00000054473
58444	24	21204601	21204900	*	3.17952e-06	0.000335715	-14.4428		pou3f3b		ENSDARG00000032705	ENSDART00000013642
58768	24	30645301	30645600	*	5.89558e-07	8.38413e-05	-12.0827		pou4f1		ENSDARG00000012833	ENSDART00000151904
58820	24	31661701	31662000	*	1.6673e-06	0.000197265	-10.3738		ppp1cbl		ENSDARG00000012833	ENSDART00000136874
59064	24	36396301	36396600	*	4.4726e-08	1.03977e-05	-13.2244		ppp2r1b		ENSDARG00000012833	ENSDART00000015729
59322	24	40861201	40861500	*	6.34348e-12	3.95569e-09	-16.0643		ppp2r2a		ENSDARG00000004843	ENSDART00000129022
59505	25	1331401	1331700	*	1.37328e-05	0.00103895	-14.4935		pprc1		ENSDARG00000004843	ENSDART00000104985
59845	25	5441101	5441400	*	1.5454e-06	0.000186167	-13.4667		prcp		ENSDARG00000004843	ENSDART00000136509
59857	25	5624101	5624400	*	4.15447e-05	0.00242036	-11.4975		prdm5		ENSDARG00000004843	ENSDART00000146526
59932	25	6940201	6940500	*	8.46754e-06	0.0007068	-11.2304		prkab1a		ENSDARG00000076120	ENSDART00000161485
60451	25	19104601	19104900	*	3.88578e-15	4.9039e-12	-15.7795		prkg1b		ENSDARG00000076120	ENSDART00000114288
60509	25	20971801	20972100	*	2.3711e-12	1.69837e-09	-14.5777		prox2		ENSDARG00000062402	ENSDART00000135604
60590	25	23454901	23455200	*	2.35112e-12	1.69837e-09	-25.5425		psme3		ENSDARG00000062402	ENSDART00000090217
60591	25	23455201	23455500	*	1.48053e-11	8.34837e-09	-26.7547		ptbp2a		ENSDARG00000062402	ENSDART00000170076
61087	25	32508001	32508300	*	4.98353e-07	7.39916e-05	-15.6525		ptch2		ENSDARG00000059574	ENSDART00000082937
61105	25	32903401	32903700	*	1.60658e-06	0.000191362	-17.4371		pthlha		ENSDARG00000060004	ENSDART00000084055
61288	25	34866301	34866600	*	9.42901e-06	0.00076536	-19.1309		ptprc		ENSDARG00000017741	ENSDART00000139855
61448	25	36865201	36865500	*	1.6113e-05	0.00117964	-16.1551		ptprea		ENSDARG00000017741	ENSDART00000018651
									ptpro		ENSDARG00000017741	ENSDART00000142340
									pvrl1b		ENSDARG00000017741	ENSDART00000145850
									qkib		ENSDARG00000017741	ENSDART00000143518
									rabggtb		ENSDARG00000017741	ENSDART00000147991
									rad21b		ENSDARG00000079586	ENSDART00000114750
									raly		ENSDARG00000079586	ENSDART00000148259
									ranbp1		ENSDARG00000079586	ENSDART00000170532
									rap2b		ENSDARG00000090183	ENSDART00000113230
									rapgef1a		ENSDARG00000090183	ENSDART00000161282
									rasa1b		ENSDARG00000090183	ENSDART00000112854
									rbks		ENSDARG00000092718	ENSDART00000140766
									rbm41		ENSDARG00000044015	ENSDART00000148013
									rc3h2		ENSDARG00000044015	ENSDART00000080430
									rdh14a		ENSDARG00000036155	ENSDART00000139293
									recql		ENSDARG00000036155	ENSDART00000052499
									rgs12a		ENSDARG00000069726	ENSDART00000142833
									rhol		ENSDARG00000069726	ENSDART00000164871
									rictora		ENSDARG00000012019	ENSDART00000136733
									riok3		ENSDARG00000012019	ENSDART00000005499
									rnd2		ENSDARG00000012019	ENSDART00000167603
									rnf126		ENSDARG00000012019	ENSDART00000066197
									rnf220a		ENSDARG00000012019	ENSDART00000047680
									rpl18a		ENSDARG00000062812	ENSDART00000145156
									rps11		ENSDARG00000062812	ENSDART00000137280
									rps27.2		ENSDARG00000099776	ENSDART00000170216
									rtn4r		ENSDARG00000099776	ENSDART00000163822
									rtn4rl1b		ENSDARG00000099776	ENSDART00000172148
									runx1t1		ENSDARG00000053326	ENSDART00000044411
									rxfp3.2a		ENSDARG00000056831	ENSDART00000163053
									samm50l		ENSDARG00000056831	ENSDART00000160812
									sc:d411		ENSDARG00000056831	ENSDART00000158244
									scn2b		ENSDARG00000056831	ENSDART00000079398
									scospondin		ENSDARG00000056831	ENSDART00000165467
									scrib		ENSDARG00000056831	ENSDART00000165880
									sema3aa		ENSDARG00000090585	ENSDART00000125971
									sema3bl		ENSDARG00000062430	ENSDART00000144028
									sema3gb		ENSDARG00000062430	ENSDART00000140453
									sepw1		ENSDARG00000062430	ENSDART00000090266
									sh2d3ca		ENSDARG00000100851	ENSDART00000170854
									sh3gl1a		ENSDARG00000100851	ENSDART00000167517
									si:busm1-57f23.1		ENSDARG00000070794	ENSDART00000139091
									si:busm1-79m10.4		ENSDARG00000070794	ENSDART00000076611
									si:ch1073-112i17.1		ENSDARG00000070794	ENSDART00000131670
									si:ch1073-140o9.2		ENSDARG00000070794	ENSDART00000104249
									si:ch1073-189o9.1		ENSDARG00000026753	ENSDART00000153872
									si:ch211-106g4.2		ENSDARG00000026753	ENSDART00000156760
									si:ch211-113a14.28		ENSDARG00000026753	ENSDART00000157144
									si:ch211-113g11.6		ENSDARG00000026753	ENSDART00000035812
									si:ch211-122m3.1		ENSDARG00000089769	ENSDART00000122966
									si:ch211-13k12.1		ENSDARG00000089769	ENSDART00000111589
									si:ch211-197n1.2		ENSDARG00000089769	ENSDART00000166907
									si:ch211-206a7.2		ENSDARG00000045802	ENSDART00000067323
									si:ch211-207c6.4		ENSDARG00000061685	ENSDART00000136140
									si:ch211-216l23.1		ENSDARG00000034957	ENSDART00000050729
									si:ch211-234b19.1		ENSDARG00000034957	ENSDART00000153142
									si:ch211-273d2.3		ENSDARG00000056400	ENSDART00000078889
									si:ch211-278a6.1		ENSDARG00000013441	ENSDART00000023531
									si:ch211-287c22.1		ENSDARG00000055493	ENSDART00000077853
									si:ch73-196k8.2		ENSDARG00000055493	ENSDART00000148190
									si:ch73-340m8.2		ENSDARG00000012796	ENSDART00000143295
									si:ch73-46j18.4		ENSDARG00000012796	ENSDART00000004745
									si:dkey-100n10.2		ENSDARG00000054033	ENSDART00000136415
									si:dkey-14a7.2		ENSDARG00000059616	ENSDART00000083040
									si:dkey-14a7.4		ENSDARG00000041065	ENSDART00000060162
									si:dkey-266f7.1		ENSDARG00000041065	ENSDART00000149816
									si:dkey-266f7.9		ENSDARG00000041065	ENSDART00000152108
									si:dkey-32e23.4		ENSDARG00000071699	ENSDART00000106205
									si:dkey-34f9.3		ENSDARG00000071699	ENSDART00000132499
									si:dkey-37m8.10		ENSDARG00000013539	ENSDART00000016430
									si:dkey-63j1.7		ENSDARG00000013539	ENSDART00000042377
									si:dkey-96f10.1		ENSDARG00000013539	ENSDART00000046079
									si:dkeyp-94b4.1		ENSDARG00000013539	ENSDART00000050481
									siae		ENSDARG00000013539	ENSDART00000079724
									sirt6		ENSDARG00000052417	ENSDART00000074272
									slc37a4b		ENSDARG00000092181	ENSDART00000134416
									slc39a9		ENSDARG00000045935	ENSDART00000161669
									slc44a5a		ENSDARG00000045935	ENSDART00000114062
									slc5a12		ENSDARG00000012671	ENSDART00000004241
									slco5a1		ENSDARG00000069085	ENSDART00000143487
									slit3		ENSDARG00000069085	ENSDART00000023545
									smc1a		ENSDARG00000098635	ENSDART00000168531
									smtla		ENSDARG00000101831	ENSDART00000162474
									smyd3		ENSDARG00000101831	ENSDART00000161774
									smyhc1		ENSDARG00000101831	ENSDART00000166103
									snrpa1		ENSDARG00000101831	ENSDART00000170665
									snx21		ENSDARG00000001785	ENSDART00000016303
									snx33		ENSDARG00000001785	ENSDART00000148452
									snx7		ENSDARG00000001785	ENSDART00000148602
									snx8a		ENSDARG00000034043	ENSDART00000043857
									sox9a		ENSDARG00000007950	ENSDART00000153537
									spata6		ENSDARG00000007950	ENSDART00000154865
									spice1		ENSDARG00000007950	ENSDART00000022861
									spon1a		ENSDARG00000028581	ENSDART00000039438
									spred2b		ENSDARG00000028581	ENSDART00000130930
									srl		ENSDARG00000028581	ENSDART00000146786
									stap2a		ENSDARG00000055429	ENSDART00000148191
									ston2		ENSDARG00000055429	ENSDART00000136624
									stxbp5b		ENSDARG00000055429	ENSDART00000077775
									sult6b1		ENSDARG00000032799	ENSDART00000138890
									sumo2b		ENSDARG00000032799	ENSDART00000042673
									syne1b		ENSDARG00000017880	ENSDART00000124751
									sytl2		ENSDARG00000017880	ENSDART00000137322
									sytl3		ENSDARG00000017880	ENSDART00000131361
									tank		ENSDARG00000017880	ENSDART00000166540
									tars		ENSDARG00000017880	ENSDART00000064581
									tas1r3		ENSDARG00000045589	ENSDART00000067031
									tbx1		ENSDARG00000023587	ENSDART00000030934
									tbx2b		ENSDARG00000104665	ENSDART00000172664
									tbx5a		ENSDARG00000104665	ENSDART00000163622
									tcf4		ENSDARG00000060697	ENSDART00000148870
									tenc1a		ENSDARG00000056322	ENSDART00000130101
									tfap2c		ENSDARG00000056322	ENSDART00000137220
									tgif1		ENSDARG00000056322	ENSDART00000133065
									tgm1		ENSDARG00000056322	ENSDART00000147348
									timeless		ENSDARG00000056322	ENSDART00000136863
									tjp2b		ENSDARG00000056322	ENSDART00000131870
									tlk2		ENSDARG00000056322	ENSDART00000078720
									tlr18		ENSDARG00000056322	ENSDART00000078740
									tm2d1		ENSDARG00000056322	ENSDART00000139218
									tmem161b		ENSDARG00000056322	ENSDART00000044719
									tmem39a		ENSDARG00000056322	ENSDART00000078721
									tmem53		ENSDARG00000056322	ENSDART00000130957
									tnip1		ENSDARG00000056322	ENSDART00000130424
									tpm1		ENSDARG00000056322	ENSDART00000078757
									trim25l		ENSDARG00000056322	ENSDART00000131856
									trim63		ENSDARG00000056322	ENSDART00000078747
									triqk		ENSDARG00000056322	ENSDART00000126467
									tspan11		ENSDARG00000056322	ENSDART00000078759
									tsr1		ENSDARG00000056322	ENSDART00000129841
									tssc1		ENSDARG00000056322	ENSDART00000074061
									tubgcp4		ENSDARG00000037879	ENSDART00000028673
									twist2		ENSDARG00000037879	ENSDART00000138280
									uba52		ENSDARG00000044001	ENSDART00000064597
									unc50		ENSDARG00000044001	ENSDART00000103272
									uox		ENSDARG00000009653	ENSDART00000150913
									upf1		ENSDARG00000009653	ENSDART00000151613
									usp22		ENSDARG00000014018	ENSDART00000005641
									usp42		ENSDARG00000014018	ENSDART00000134373
									uts2a		ENSDARG00000002330	ENSDART00000019078
									vamp3		ENSDARG00000002330	ENSDART00000144982
									vax2		ENSDARG00000002330	ENSDART00000132313
									veph		ENSDARG00000034165	ENSDART00000149965
									vps25		ENSDARG00000034165	ENSDART00000041820
									vps33a		ENSDARG00000104223	ENSDART00000162858
									vwc2		ENSDARG00000104223	ENSDART00000164380
									wipf2b		ENSDARG00000104223	ENSDART00000157524
									wnt4a		ENSDARG00000104223	ENSDART00000160193
									xpo7		ENSDARG00000054749	ENSDART00000076997
									xrcc5		ENSDARG00000054749	ENSDART00000148748
									yif1b		ENSDARG00000068365	ENSDART00000076420
									zak		ENSDARG00000068365	ENSDART00000147131
									zbtb24		ENSDARG00000068365	ENSDART00000127460
									zc3h3		ENSDARG00000045574	ENSDART00000135730
									zfand2a		ENSDARG00000045574	ENSDART00000131973
									zfpm2a		ENSDARG00000045574	ENSDART00000145513
									zgc:101123		ENSDARG00000045574	ENSDART00000147853
									zgc:101549		ENSDARG00000040478	ENSDART00000170167
									zgc:101564		ENSDARG00000040478	ENSDART00000059243
									zgc:109736		ENSDARG00000078415	ENSDART00000142888
									zgc:110091		ENSDARG00000080015	ENSDART00000141364
									zgc:110289		ENSDARG00000080015	ENSDART00000113737
									zgc:110372		ENSDARG00000100528	ENSDART00000161846
									zgc:110852		ENSDARG00000100528	ENSDART00000173360
									zgc:112148		ENSDARG00000058470	ENSDART00000081341
									zgc:112294		ENSDARG00000058470	ENSDART00000151388
									zgc:113142		ENSDARG00000022895	ENSDART00000034883
									zgc:114130		ENSDARG00000022895	ENSDART00000148830
									zgc:136336		ENSDARG00000009681	ENSDART00000005140
									zgc:136872		ENSDARG00000009681	ENSDART00000138111
									zgc:136924		ENSDARG00000029764	ENSDART00000131731
									zgc:152692		ENSDARG00000029764	ENSDART00000097433
									zgc:153846		ENSDARG00000029764	ENSDART00000131309
									zgc:154085		ENSDARG00000029764	ENSDART00000134219
									zgc:158785		ENSDARG00000029764	ENSDART00000134953
									zgc:162879		ENSDARG00000029764	ENSDART00000138962
									zgc:162939		ENSDARG00000029764	ENSDART00000027392
									zgc:165532		ENSDARG00000029764	ENSDART00000039551
									zgc:165617		ENSDARG00000029764	ENSDART00000160786
									zgc:165627		ENSDARG00000029764	ENSDART00000099134
									zgc:171489		ENSDARG00000009418	ENSDART00000135911
									zgc:171550		ENSDARG00000009418	ENSDART00000138702
									zgc:171558		ENSDARG00000009418	ENSDART00000163250
									zgc:171775		ENSDARG00000009418	ENSDART00000044083
									zgc:171951		ENSDARG00000102366	ENSDART00000162096
									zgc:173548		ENSDARG00000102366	ENSDART00000165708
									zgc:173577		ENSDARG00000102366	ENSDART00000159413
									zgc:174178		ENSDARG00000012005	ENSDART00000126916
									zgc:174356		ENSDARG00000012005	ENSDART00000131349
									zgc:174864		ENSDARG00000012005	ENSDART00000162940
									zgc:175088		ENSDARG00000033973	ENSDART00000135632
									zgc:175280		ENSDARG00000033973	ENSDART00000044452
									zgc:193616		ENSDARG00000032614	ENSDART00000100194
									zgc:194841		ENSDARG00000032614	ENSDART00000155212
									zgc:77052		ENSDARG00000032614	ENSDART00000156584
									zgc:77391		ENSDARG00000032614	ENSDART00000156160
									zgc:77784		ENSDARG00000032614	ENSDART00000154714
									zgc:85789		ENSDARG00000032614	ENSDART00000156914
									zgc:92511		ENSDARG00000032614	ENSDART00000050649
									zranb1b		ENSDARG00000032614	ENSDART00000145918
											ENSDARG00000032614	ENSDART00000152414
											ENSDARG00000032614	ENSDART00000154311
											ENSDARG00000032614	ENSDART00000152330
											ENSDARG00000032614	ENSDART00000152790
											ENSDARG00000032614	ENSDART00000136901
											ENSDARG00000032614	ENSDART00000142827
											ENSDARG00000032614	ENSDART00000142982
											ENSDARG00000004130	ENSDART00000006673
											ENSDARG00000026049	ENSDART00000155402
											ENSDARG00000007241	ENSDART00000005143
											ENSDARG00000007241	ENSDART00000135040
											ENSDARG00000001220	ENSDART00000039157
											ENSDARG00000001220	ENSDART00000124901
											ENSDARG00000102879	ENSDART00000157612
											ENSDARG00000102879	ENSDART00000164117
											ENSDARG00000102879	ENSDART00000165427
											ENSDARG00000027825	ENSDART00000154940
											ENSDARG00000027825	ENSDART00000155977
											ENSDARG00000027825	ENSDART00000122762
											ENSDARG00000027825	ENSDART00000156979
											ENSDARG00000042940	ENSDART00000146484
											ENSDARG00000042940	ENSDART00000063038
											ENSDARG00000070560	ENSDART00000103704
											ENSDARG00000070560	ENSDART00000149107
											ENSDARG00000056966	ENSDART00000079536
											ENSDARG00000056966	ENSDART00000165554
											ENSDARG00000062420	ENSDART00000138233
											ENSDARG00000062420	ENSDART00000138382
											ENSDARG00000062420	ENSDART00000090237
											ENSDARG00000062420	ENSDART00000090242
											ENSDARG00000087188	ENSDART00000127604
											ENSDARG00000077710	ENSDART00000113171
											ENSDARG00000043066	ENSDART00000063231
											ENSDARG00000044402	ENSDART00000065208
											ENSDARG00000090912	ENSDART00000050399
											ENSDARG00000090912	ENSDART00000139875
											ENSDARG00000090912	ENSDART00000132754
											ENSDARG00000090912	ENSDART00000124663
											ENSDARG00000060758	ENSDART00000150109
											ENSDARG00000060758	ENSDART00000085971
											ENSDARG00000018721	ENSDART00000018469
											ENSDARG00000018721	ENSDART00000134988
											ENSDARG00000018721	ENSDART00000135780
											ENSDARG00000018721	ENSDART00000165973
											ENSDARG00000018721	ENSDART00000158988
											ENSDARG00000052695	ENSDART00000133384
											ENSDARG00000104314	ENSDART00000167706
											ENSDARG00000104314	ENSDART00000162613
											ENSDARG00000104314	ENSDART00000163702
											ENSDARG00000104314	ENSDART00000167963
											ENSDARG00000104314	ENSDART00000162021
											ENSDARG00000104314	ENSDART00000167054
											ENSDARG00000104314	ENSDART00000168885
											ENSDARG00000102153	ENSDART00000159212
											ENSDARG00000102153	ENSDART00000159267
											ENSDARG00000102153	ENSDART00000164904
											ENSDARG00000102153	ENSDART00000169341
											ENSDARG00000061454	ENSDART00000141629
											ENSDARG00000061454	ENSDART00000132583
											ENSDARG00000061454	ENSDART00000134196
											ENSDARG00000061454	ENSDART00000087657
											ENSDARG00000061454	ENSDART00000164458
											ENSDARG00000003934	ENSDART00000016103
											ENSDARG00000022098	ENSDART00000122687
											ENSDARG00000071209	ENSDART00000105135
											ENSDARG00000071209	ENSDART00000158531
											ENSDARG00000091555	ENSDART00000168698
											ENSDARG00000091555	ENSDART00000168556
											ENSDARG00000091555	ENSDART00000157402
											ENSDARG00000091555	ENSDART00000128684
											ENSDARG00000101325	ENSDART00000159249
											ENSDARG00000024139	ENSDART00000029063
											ENSDARG00000070657	ENSDART00000016248
											ENSDARG00000070657	ENSDART00000132271
											ENSDARG00000070657	ENSDART00000131486
											ENSDARG00000017703	ENSDART00000020808
											ENSDARG00000021555	ENSDART00000029649
											ENSDARG00000021555	ENSDART00000146240
											ENSDARG00000021555	ENSDART00000157437
											ENSDARG00000100398	ENSDART00000169817
											ENSDARG00000100398	ENSDART00000162157
											ENSDARG00000100398	ENSDART00000172008
											ENSDARG00000100398	ENSDART00000170657
											ENSDARG00000015879	ENSDART00000029014
											ENSDARG00000100494	ENSDART00000165698
											ENSDARG00000100494	ENSDART00000165782
											ENSDARG00000100494	ENSDART00000165330
											ENSDARG00000054378	ENSDART00000132930
											ENSDARG00000054378	ENSDART00000015267
											ENSDARG00000054378	ENSDART00000148317
											ENSDARG00000054378	ENSDART00000134431
											ENSDARG00000054378	ENSDART00000144448
											ENSDARG00000054378	ENSDART00000048893
											ENSDARG00000034344	ENSDART00000149443
											ENSDARG00000034344	ENSDART00000173398
											ENSDARG00000062720	ENSDART00000139733
											ENSDARG00000062720	ENSDART00000134692
											ENSDARG00000062720	ENSDART00000091004
											ENSDARG00000101232	ENSDART00000160464
											ENSDARG00000019501	ENSDART00000133441
											ENSDARG00000041022	ENSDART00000009223
											ENSDARG00000041022	ENSDART00000166002
											ENSDARG00000051756	ENSDART00000102855
											ENSDARG00000051756	ENSDART00000148566
											ENSDARG00000051756	ENSDART00000149763
											ENSDARG00000051756	ENSDART00000073435
											ENSDARG00000051756	ENSDART00000171026
											ENSDARG00000051756	ENSDART00000157623
											ENSDARG00000028000	ENSDART00000033394
											ENSDARG00000028000	ENSDART00000131753
											ENSDARG00000028000	ENSDART00000167043
											ENSDARG00000035608	ENSDART00000051621
											ENSDARG00000014704	ENSDART00000101937
											ENSDARG00000014704	ENSDART00000010350
											ENSDARG00000042874	ENSDART00000062930
											ENSDARG00000045378	ENSDART00000141620
											ENSDARG00000044091	ENSDART00000149362
											ENSDARG00000044091	ENSDART00000002974
											ENSDARG00000004576	ENSDART00000043866
											ENSDARG00000078417	ENSDART00000133533
											ENSDARG00000075821	ENSDART00000142442
											ENSDARG00000075821	ENSDART00000131669
											ENSDARG00000075821	ENSDART00000111518
											ENSDARG00000075821	ENSDART00000137308
											ENSDARG00000075821	ENSDART00000166663
											ENSDARG00000036985	ENSDART00000042781
											ENSDARG00000015851	ENSDART00000012670
											ENSDARG00000098783	ENSDART00000162719
											ENSDARG00000098783	ENSDART00000167276
											ENSDARG00000098783	ENSDART00000160293
											ENSDARG00000098783	ENSDART00000157647
											ENSDARG00000098783	ENSDART00000167045
											ENSDARG00000056127	ENSDART00000078557
											ENSDARG00000056127	ENSDART00000148216
											ENSDARG00000043135	ENSDART00000063333
											ENSDARG00000043135	ENSDART00000170818
											ENSDARG00000052025	ENSDART00000073755
											ENSDARG00000052025	ENSDART00000122242
											ENSDARG00000095896	ENSDART00000149949
											ENSDARG00000095896	ENSDART00000149202
											ENSDARG00000005559	ENSDART00000025031
											ENSDARG00000102012	ENSDART00000172681
											ENSDARG00000102012	ENSDART00000160195
											ENSDARG00000032430	ENSDART00000016860
											ENSDARG00000032430	ENSDART00000135541
											ENSDARG00000090337	ENSDART00000125430
											ENSDARG00000037883	ENSDART00000083367
											ENSDARG00000006288	ENSDART00000127443
											ENSDARG00000044183	ENSDART00000064866
											ENSDARG00000044183	ENSDART00000146489
											ENSDARG00000031702	ENSDART00000152765
											ENSDARG00000031702	ENSDART00000152616
											ENSDARG00000031702	ENSDART00000043236
											ENSDARG00000041952	ENSDART00000114931
											ENSDARG00000041952	ENSDART00000165167
											ENSDARG00000012234	ENSDART00000002835
											ENSDARG00000012234	ENSDART00000153101
											ENSDARG00000012234	ENSDART00000162528
											ENSDARG00000101947	ENSDART00000168540
											ENSDARG00000101947	ENSDART00000171482
											ENSDARG00000101947	ENSDART00000162920
											ENSDARG00000055026	ENSDART00000140910
											ENSDARG00000055026	ENSDART00000077304
											ENSDARG00000031737	ENSDART00000049154
											ENSDARG00000071437	ENSDART00000137111
											ENSDARG00000071437	ENSDART00000105607
											ENSDARG00000071437	ENSDART00000137873
											ENSDARG00000015891	ENSDART00000004122
											ENSDARG00000015891	ENSDART00000169949
											ENSDARG00000100422	ENSDART00000172566
											ENSDARG00000100422	ENSDART00000169667
											ENSDARG00000100422	ENSDART00000169187
											ENSDARG00000086034	ENSDART00000151279
											ENSDARG00000086034	ENSDART00000151166
											ENSDARG00000086034	ENSDART00000125236
											ENSDARG00000086034	ENSDART00000084454
											ENSDARG00000002026	ENSDART00000131553
											ENSDARG00000002026	ENSDART00000139958
											ENSDARG00000002026	ENSDART00000136913
											ENSDARG00000002026	ENSDART00000018737
											ENSDARG00000068587	ENSDART00000099247
											ENSDARG00000068587	ENSDART00000099248
											ENSDARG00000068587	ENSDART00000134495
											ENSDARG00000068587	ENSDART00000165590
											ENSDARG00000035655	ENSDART00000132800
											ENSDARG00000059972	ENSDART00000083999
											ENSDARG00000059972	ENSDART00000143050
											ENSDARG00000059972	ENSDART00000125950
											ENSDARG00000059972	ENSDART00000163648
											ENSDARG00000014817	ENSDART00000002624
											ENSDARG00000014817	ENSDART00000148087
											ENSDARG00000014817	ENSDART00000110553
											ENSDARG00000103032	ENSDART00000160206
											ENSDARG00000043593	ENSDART00000139947
											ENSDARG00000043593	ENSDART00000064017
											ENSDARG00000073665	ENSDART00000132486
											ENSDARG00000073665	ENSDART00000141685
											ENSDARG00000019877	ENSDART00000030622
											ENSDARG00000054096	ENSDART00000076238
											ENSDARG00000063050	ENSDART00000147997
											ENSDARG00000063050	ENSDART00000091780
											ENSDARG00000039299	ENSDART00000057421
											ENSDARG00000007175	ENSDART00000021610
											ENSDARG00000007175	ENSDART00000172169
											ENSDARG00000007175	ENSDART00000162204
											ENSDARG00000007175	ENSDART00000101198
											ENSDARG00000009610	ENSDART00000040534
											ENSDARG00000070666	ENSDART00000103973
											ENSDARG00000100867	ENSDART00000164844
											ENSDARG00000100867	ENSDART00000157765
											ENSDARG00000042751	ENSDART00000062745
											ENSDARG00000070735	ENSDART00000134969
											ENSDARG00000104076	ENSDART00000163834
											ENSDARG00000104076	ENSDART00000170428
											ENSDARG00000060929	ENSDART00000086340
											ENSDARG00000060929	ENSDART00000143879
											ENSDARG00000060929	ENSDART00000145588
											ENSDARG00000060929	ENSDART00000136330
											ENSDARG00000060929	ENSDART00000139295
											ENSDARG00000060929	ENSDART00000134651
											ENSDARG00000025073	ENSDART00000030215
											ENSDARG00000025073	ENSDART00000148933
											ENSDARG00000053058	ENSDART00000075028
											ENSDARG00000053058	ENSDART00000134524
											ENSDARG00000055475	ENSDART00000077834
											ENSDARG00000055475	ENSDART00000139964
											ENSDARG00000055475	ENSDART00000134604
											ENSDARG00000100513	ENSDART00000167033
											ENSDARG00000090035	ENSDART00000157043
											ENSDARG00000090035	ENSDART00000163139
											ENSDARG00000090035	ENSDART00000031265
											ENSDARG00000098528	ENSDART00000159589
											ENSDARG00000003680	ENSDART00000147226
											ENSDARG00000003680	ENSDART00000123270
											ENSDARG00000003680	ENSDART00000151521
											ENSDARG00000003680	ENSDART00000151192
											ENSDARG00000003680	ENSDART00000162517
											ENSDARG00000003680	ENSDART00000010294
											ENSDARG00000022739	ENSDART00000028693
											ENSDARG00000039681	ENSDART00000058007
											ENSDARG00000101713	ENSDART00000161274
											ENSDARG00000101713	ENSDART00000162807
											ENSDARG00000101713	ENSDART00000162601
											ENSDARG00000067859	ENSDART00000136590
											ENSDARG00000067859	ENSDART00000097773
											ENSDARG00000000861	ENSDART00000021013
											ENSDARG00000000861	ENSDART00000164200
											ENSDARG00000000861	ENSDART00000074212
											ENSDARG00000019235	ENSDART00000051792
											ENSDARG00000007560	ENSDART00000046863
											ENSDARG00000007560	ENSDART00000140980
											ENSDARG00000013607	ENSDART00000129378
											ENSDARG00000013607	ENSDART00000026316
											ENSDARG00000035136	ENSDART00000137110
											ENSDARG00000035136	ENSDART00000145833
											ENSDARG00000035136	ENSDART00000166482
											ENSDARG00000035136	ENSDART00000163909
											ENSDARG00000035136	ENSDART00000050884
											ENSDARG00000028099	ENSDART00000144214
											ENSDARG00000028099	ENSDART00000029457
											ENSDARG00000067958	ENSDART00000129967
											ENSDARG00000074425	ENSDART00000001253
											ENSDARG00000000142	ENSDART00000135082
											ENSDARG00000101804	ENSDART00000160830
											ENSDARG00000104054	ENSDART00000143250
											ENSDARG00000089107	ENSDART00000122292
											ENSDARG00000070297	ENSDART00000152766
											ENSDARG00000070442	ENSDART00000148405
											ENSDARG00000070442	ENSDART00000148960
											ENSDARG00000070442	ENSDART00000170705
											ENSDARG00000070442	ENSDART00000115260
											ENSDARG00000067824	ENSDART00000136363
											ENSDARG00000067824	ENSDART00000143636
											ENSDARG00000067824	ENSDART00000097695
											ENSDARG00000024619	ENSDART00000131134
											ENSDARG00000059707	ENSDART00000146133
											ENSDARG00000059707	ENSDART00000083296
											ENSDARG00000059773	ENSDART00000148107
											ENSDARG00000059773	ENSDART00000083442
											ENSDARG00000091944	ENSDART00000139502
											ENSDARG00000091944	ENSDART00000163806
											ENSDARG00000040258	ENSDART00000058894
											ENSDARG00000062672	ENSDART00000090881
											ENSDARG00000058672	ENSDART00000132180
											ENSDARG00000058672	ENSDART00000151391
											ENSDARG00000058672	ENSDART00000136704
											ENSDARG00000058672	ENSDART00000146691
											ENSDARG00000058672	ENSDART00000081584
											ENSDARG00000075958	ENSDART00000146987
											ENSDARG00000063159	ENSDART00000142061
											ENSDARG00000063159	ENSDART00000138422
											ENSDARG00000077813	ENSDART00000135202
											ENSDARG00000074457	ENSDART00000139166
											ENSDARG00000074457	ENSDART00000135103
											ENSDARG00000074457	ENSDART00000146640
											ENSDARG00000074457	ENSDART00000103231
											ENSDARG00000102056	ENSDART00000161500
											ENSDARG00000102056	ENSDART00000170017
											ENSDARG00000102056	ENSDART00000166803
											ENSDARG00000040527	ENSDART00000059311
											ENSDARG00000040527	ENSDART00000163912
											ENSDARG00000093531	ENSDART00000139156
											ENSDARG00000077180	ENSDART00000111362
											ENSDARG00000077180	ENSDART00000150193
											ENSDARG00000077180	ENSDART00000148825
											ENSDARG00000077180	ENSDART00000161758
											ENSDARG00000070447	ENSDART00000103397
											ENSDARG00000070447	ENSDART00000160219
											ENSDARG00000017398	ENSDART00000131229
											ENSDARG00000017398	ENSDART00000140823
											ENSDARG00000017398	ENSDART00000165803
											ENSDARG00000005004	ENSDART00000156782
											ENSDARG00000005004	ENSDART00000009271
											ENSDARG00000071685	ENSDART00000152026
											ENSDARG00000071685	ENSDART00000151923
											ENSDARG00000034268	ENSDART00000146299
											ENSDARG00000034268	ENSDART00000126199
											ENSDARG00000055754	ENSDART00000078148
											ENSDARG00000038191	ENSDART00000128189
											ENSDARG00000058050	ENSDART00000105236
											ENSDARG00000099959	ENSDART00000169315
											ENSDARG00000099959	ENSDART00000172073
											ENSDARG00000099959	ENSDART00000161309
											ENSDARG00000099959	ENSDART00000167533
											ENSDARG00000099959	ENSDART00000172617
											ENSDARG00000099959	ENSDART00000171543
											ENSDARG00000024651	ENSDART00000128530
											ENSDARG00000024651	ENSDART00000102584
											ENSDARG00000024651	ENSDART00000148818
											ENSDARG00000024651	ENSDART00000149146
											ENSDARG00000062770	ENSDART00000091140
											ENSDARG00000014954	ENSDART00000009971
											ENSDARG00000014954	ENSDART00000132927
											ENSDARG00000105185	ENSDART00000168723
											ENSDARG00000105185	ENSDART00000162328
											ENSDARG00000105185	ENSDART00000164187
											ENSDARG00000074842	ENSDART00000157164
											ENSDARG00000074842	ENSDART00000109392
											ENSDARG00000003293	ENSDART00000005676
											ENSDARG00000003293	ENSDART00000127937
											ENSDARG00000021115	ENSDART00000134794
											ENSDARG00000021115	ENSDART00000140867
											ENSDARG00000021115	ENSDART00000137923
											ENSDARG00000004647	ENSDART00000012653
											ENSDARG00000010029	ENSDART00000016983
											ENSDARG00000008372	ENSDART00000045292
											ENSDARG00000008372	ENSDART00000123179
											ENSDARG00000008372	ENSDART00000165625
											ENSDARG00000104587	ENSDART00000159393
											ENSDARG00000104587	ENSDART00000165131
											ENSDARG00000104587	ENSDART00000158163
											ENSDARG00000104587	ENSDART00000171272
											ENSDARG00000092810	ENSDART00000056254
											ENSDARG00000057452	ENSDART00000080129
											ENSDARG00000029234	ENSDART00000098731
											ENSDARG00000086826	ENSDART00000130131
											ENSDARG00000102741	ENSDART00000157771
											ENSDARG00000102741	ENSDART00000166758
											ENSDARG00000063068	ENSDART00000148520
											ENSDARG00000063068	ENSDART00000148604
											ENSDARG00000063068	ENSDART00000091828
											ENSDARG00000043468	ENSDART00000143115
											ENSDARG00000043468	ENSDART00000063818
											ENSDARG00000067723	ENSDART00000148918
											ENSDARG00000103688	ENSDART00000167034
											ENSDARG00000013250	ENSDART00000034523
											ENSDARG00000013250	ENSDART00000157668
											ENSDARG00000013250	ENSDART00000051141
											ENSDARG00000013250	ENSDART00000167746
											ENSDARG00000006341	ENSDART00000173399
											ENSDARG00000006341	ENSDART00000021369
											ENSDARG00000031891	ENSDART00000144915
											ENSDARG00000031891	ENSDART00000040826
											ENSDARG00000006120	ENSDART00000122101
											ENSDARG00000006120	ENSDART00000005491
											ENSDARG00000024894	ENSDART00000037691
											ENSDARG00000024894	ENSDART00000114947
											ENSDARG00000024894	ENSDART00000037681
											ENSDARG00000024894	ENSDART00000162171
											ENSDARG00000040606	ENSDART00000149665
											ENSDARG00000040606	ENSDART00000150219
											ENSDARG00000059337	ENSDART00000082434
											ENSDARG00000059337	ENSDART00000152378
											ENSDARG00000059337	ENSDART00000149875
											ENSDARG00000017799	ENSDART00000149545
											ENSDARG00000078497	ENSDART00000112417
											ENSDARG00000078497	ENSDART00000161529
											ENSDARG00000023443	ENSDART00000092355
											ENSDARG00000023443	ENSDART00000136184
											ENSDARG00000023443	ENSDART00000137559
											ENSDARG00000023443	ENSDART00000115057
											ENSDARG00000023443	ENSDART00000018739
											ENSDARG00000023443	ENSDART00000170624
											ENSDARG00000023443	ENSDART00000162845
											ENSDARG00000010779	ENSDART00000006490
											ENSDARG00000010779	ENSDART00000141937
											ENSDARG00000040249	ENSDART00000149289
											ENSDARG00000040249	ENSDART00000130757
											ENSDARG00000057042	ENSDART00000079638
											ENSDARG00000057042	ENSDART00000157705
											ENSDARG00000057042	ENSDART00000113099
											ENSDARG00000055989	ENSDART00000078401
											ENSDARG00000102746	ENSDART00000171547
											ENSDARG00000102746	ENSDART00000168091
											ENSDARG00000102746	ENSDART00000164075
											ENSDARG00000102746	ENSDART00000170183
											ENSDARG00000102746	ENSDART00000165693
											ENSDARG00000102746	ENSDART00000160050
											ENSDARG00000102746	ENSDART00000169744
											ENSDARG00000102746	ENSDART00000168660
											ENSDARG00000102746	ENSDART00000160490
											ENSDARG00000038789	ENSDART00000056649
											ENSDARG00000015653	ENSDART00000158329
											ENSDARG00000015653	ENSDART00000172850
											ENSDARG00000015653	ENSDART00000169441
											ENSDARG00000015653	ENSDART00000020961
											ENSDARG00000015653	ENSDART00000115072
											ENSDARG00000020863	ENSDART00000111817
											ENSDARG00000020863	ENSDART00000105278
											ENSDARG00000076296	ENSDART00000142275
											ENSDARG00000076296	ENSDART00000132840
											ENSDARG00000001781	ENSDART00000138661
											ENSDARG00000007744	ENSDART00000135409
											ENSDARG00000007744	ENSDART00000052645
											ENSDARG00000007744	ENSDART00000149256
											ENSDARG00000007744	ENSDART00000162240
											ENSDARG00000043417	ENSDART00000063738
											ENSDARG00000005374	ENSDART00000009649
											ENSDARG00000078266	ENSDART00000114814
											ENSDARG00000041435	ENSDART00000060745
											ENSDARG00000040455	ENSDART00000059212
											ENSDARG00000007024	ENSDART00000146940
											ENSDARG00000007024	ENSDART00000024046
											ENSDARG00000007024	ENSDART00000133574
											ENSDARG00000016302	ENSDART00000162582
											ENSDARG00000016302	ENSDART00000021011
											ENSDARG00000040407	ENSDART00000152411
											ENSDARG00000040407	ENSDART00000059143
											ENSDARG00000077300	ENSDART00000134597
											ENSDARG00000077300	ENSDART00000168758
											ENSDARG00000053854	ENSDART00000126027
											ENSDARG00000053854	ENSDART00000075966
											ENSDARG00000070161	ENSDART00000137516
											ENSDARG00000070161	ENSDART00000134082
											ENSDARG00000070161	ENSDART00000102734
											ENSDARG00000058702	ENSDART00000081620
											ENSDARG00000059079	ENSDART00000152433
											ENSDARG00000059079	ENSDART00000082093
											ENSDARG00000101116	ENSDART00000167388
											ENSDARG00000076495	ENSDART00000147868
											ENSDARG00000006712	ENSDART00000011025
											ENSDARG00000071208	ENSDART00000105133
											ENSDARG00000005540	ENSDART00000145264
											ENSDARG00000005540	ENSDART00000027612
											ENSDARG00000005540	ENSDART00000172713
											ENSDARG00000099298	ENSDART00000167922
											ENSDARG00000099298	ENSDART00000166564
											ENSDARG00000099298	ENSDART00000162090
											ENSDARG00000099298	ENSDART00000172534
											ENSDARG00000099298	ENSDART00000164924
											ENSDARG00000040505	ENSDART00000059285
											ENSDARG00000040505	ENSDART00000132751
											ENSDARG00000040505	ENSDART00000142004
											ENSDARG00000044615	ENSDART00000065551
											ENSDARG00000044615	ENSDART00000151393
											ENSDARG00000006978	ENSDART00000102823
											ENSDARG00000006978	ENSDART00000156194
											ENSDARG00000075533	ENSDART00000109228
											ENSDARG00000090751	ENSDART00000129803
											ENSDARG00000090751	ENSDART00000155294
											ENSDARG00000090751	ENSDART00000156461
											ENSDARG00000103511	ENSDART00000159455
											ENSDARG00000103511	ENSDART00000170444
											ENSDARG00000103511	ENSDART00000172425
											ENSDARG00000040123	ENSDART00000141941
											ENSDARG00000040123	ENSDART00000151936
											ENSDARG00000040123	ENSDART00000104583
											ENSDARG00000040123	ENSDART00000058685
											ENSDARG00000070621	ENSDART00000091182
											ENSDARG00000070621	ENSDART00000162251
											ENSDARG00000070621	ENSDART00000103883
											ENSDARG00000070621	ENSDART00000136265
											ENSDARG00000104071	ENSDART00000169685
											ENSDARG00000104071	ENSDART00000166557
											ENSDARG00000022176	ENSDART00000131304
											ENSDARG00000022176	ENSDART00000101627
											ENSDARG00000022176	ENSDART00000029283
											ENSDARG00000021909	ENSDART00000036472
											ENSDARG00000001804	ENSDART00000014103
											ENSDARG00000010602	ENSDART00000018047
											ENSDARG00000038969	ENSDART00000056886
											ENSDARG00000040725	ENSDART00000139068
											ENSDARG00000067832	ENSDART00000097716
											ENSDARG00000008553	ENSDART00000155323
											ENSDARG00000008553	ENSDART00000024059
											ENSDARG00000008553	ENSDART00000122453
											ENSDARG00000069058	ENSDART00000100185
											ENSDARG00000040738	ENSDART00000023059
											ENSDARG00000062959	ENSDART00000091584
											ENSDARG00000074163	ENSDART00000103046
											ENSDARG00000074163	ENSDART00000144043
											ENSDARG00000074163	ENSDART00000131358
											ENSDARG00000068461	ENSDART00000143809
											ENSDARG00000068461	ENSDART00000111358
											ENSDARG00000068461	ENSDART00000133209
											ENSDARG00000068461	ENSDART00000139864
											ENSDARG00000068461	ENSDART00000134046
											ENSDARG00000068461	ENSDART00000167065
											ENSDARG00000016964	ENSDART00000016660
											ENSDARG00000079679	ENSDART00000113030
											ENSDARG00000079679	ENSDART00000168198
											ENSDARG00000079679	ENSDART00000161499
											ENSDARG00000079679	ENSDART00000160876
											ENSDARG00000079679	ENSDART00000157764
											ENSDARG00000052300	ENSDART00000074129
											ENSDARG00000075924	ENSDART00000166607
											ENSDARG00000075924	ENSDART00000151694
											ENSDARG00000075924	ENSDART00000111024
											ENSDARG00000058381	ENSDART00000048073
											ENSDARG00000058381	ENSDART00000145026
											ENSDARG00000058381	ENSDART00000145232
											ENSDARG00000087311	ENSDART00000100183
											ENSDARG00000087311	ENSDART00000160985
											ENSDARG00000087311	ENSDART00000172200
											ENSDARG00000070048	ENSDART00000102493
											ENSDARG00000070048	ENSDART00000173242
											ENSDARG00000070048	ENSDART00000172896
											ENSDARG00000098923	ENSDART00000158765
											ENSDARG00000104916	ENSDART00000169253
											ENSDARG00000104916	ENSDART00000170722
											ENSDARG00000088263	ENSDART00000156138
											ENSDARG00000088263	ENSDART00000128863
											ENSDARG00000088263	ENSDART00000168779
											ENSDARG00000099306	ENSDART00000166999
											ENSDARG00000099306	ENSDART00000173086
											ENSDARG00000099111	ENSDART00000158611
											ENSDARG00000099111	ENSDART00000168994
											ENSDARG00000042646	ENSDART00000142367
											ENSDARG00000042646	ENSDART00000132665
											ENSDARG00000042646	ENSDART00000154779
											ENSDARG00000042646	ENSDART00000062560
											ENSDARG00000100254	ENSDART00000158570
											ENSDARG00000043168	ENSDART00000034564
											ENSDARG00000077058	ENSDART00000140896
											ENSDARG00000063190	ENSDART00000092113

## Sheet: 10p0.01q_tiles_hyper
	chr	start	end	strand	pvalue	qvalue	meth.diff		GREAT gene list		Biomart conversion
216	1	3074101	3074400	*	1.71668e-06	0.000200866	10.9017				Ensembl	Gene
333	1	4775101	4775400	*	8.12976e-05	0.00404235	19.4265		aars		ENSDARG00000069142	ENSDART00000100401
761	1	16554901	16555200	*	6.01196e-05	0.00321231	15.1809		abhd3		ENSDARG00000069142	ENSDART00000136544
769	1	16816801	16817100	*	0.000192906	0.00754604	11.2559		acta1a		ENSDARG00000069142	ENSDART00000076695
870	1	19481701	19482000	*	2.08936e-06	0.000235628	12.7671		adgb		ENSDARG00000018809	ENSDART00000023851
2172	1	50245501	50245800	*	2.81772e-07	4.78693e-05	21.8976		agtpbp1		ENSDARG00000036371	ENSDART00000052838
2376	1	53335201	53335500	*	5.21794e-06	0.000492125	13.5716		akr7a3		ENSDARG00000036371	ENSDART00000139625
2425	1	54088201	54088500	*	1.3052e-08	3.69955e-06	13.9618		alcamb		ENSDARG00000005595	ENSDART00000021575
2694	2	770701	771000	*	5.2244e-08	1.16843e-05	12.7132		amer2		ENSDARG00000005595	ENSDART00000162935
3385	2	12108601	12108900	*	0.000226474	0.00846557	16.1293		amy2a		ENSDARG00000105214	ENSDART00000172642
3652	2	16037401	16037700	*	7.52888e-05	0.00381036	10.2002		ank3b		ENSDARG00000105214	ENSDART00000159782
3740	2	18284701	18285000	*	2.1338e-05	0.00146884	12.6884		ankhb		ENSDARG00000016649	ENSDART00000014871
3801	2	19709401	19709700	*	2.00688e-10	9.01472e-08	16.5246		ankib1b		ENSDARG00000058538	ENSDART00000101204
3900	2	22293601	22293900	*	8.88178e-15	1.04617e-11	12.2697		ano2		ENSDARG00000075222	ENSDART00000115165
4029	2	26753401	26753700	*	8.07844e-07	0.000108679	13.7176		arfrp1		ENSDARG00000013856	ENSDART00000003035
4031	2	26756401	26756700	*	2.05666e-07	3.62167e-05	16.0975		arnt		ENSDARG00000013856	ENSDART00000156259
4175	2	30865501	30865800	*	8.88178e-16	1.20711e-12	17.774		asb13a.2		ENSDARG00000077582	ENSDART00000148866
4207	2	32025601	32025900	*	0	0	23.9634		asic1b		ENSDARG00000077582	ENSDART00000149594
4364	2	36774901	36775200	*	0.000148237	0.00622601	10.0224		atad2b		ENSDARG00000077582	ENSDART00000149453
4715	2	46897201	46897500	*	1.24882e-06	0.000156855	18.6148		atic		ENSDARG00000077582	ENSDART00000148673
5439	2	59459101	59459400	*	5.70572e-06	0.000524153	11.0323		atoh1a		ENSDARG00000077582	ENSDART00000088100
6135	3	11896201	11896500	*	1.18058e-06	0.000149704	12.1051		atp1a1b		ENSDARG00000014969	ENSDART00000012413
6265	3	14599801	14600100	*	0.000110647	0.0050041	10.8802		atp1a3a		ENSDARG00000076829	ENSDART00000131227
6285	3	14868301	14868600	*	4.09228e-08	9.64043e-06	22.1578		atp1b3b		ENSDARG00000101363	ENSDART00000164810
6550	3	23163001	23163300	*	0.000104584	0.00482038	11.8985		atp6v1h		ENSDARG00000101363	ENSDART00000171079
6716	3	27972601	27972900	*	9.025e-06	0.000740504	11.6157		atpv0e1		ENSDARG00000057857	ENSDART00000128062
6762	3	28949401	28949700	*	5.06586e-05	0.00282052	14.9369		auts2		ENSDARG00000057857	ENSDART00000157327
6863	3	32231401	32231700	*	0.000238826	0.00877259	18.6355		b3gat1		ENSDARG00000021855	ENSDART00000081852
6908	3	33856501	33856800	*	5.8048e-11	2.87552e-08	11.5802		b3gnt2b		ENSDARG00000021855	ENSDART00000029485
6938	3	35139001	35139300	*	2.16051e-08	5.69736e-06	19.4883		bai3		ENSDARG00000021855	ENSDART00000123253
7676	3	55892401	55892700	*	0.000243802	0.00887541	11.4023		barhl2		ENSDARG00000021855	ENSDART00000127554
7777	3	57312301	57312600	*	0.000107535	0.00488282	10.371		barx2		ENSDARG00000021855	ENSDART00000121648
8143	3	61622401	61622700	*	0.000156568	0.00647335	12.732		baz1b		ENSDARG00000045765	ENSDART00000140954
8203	4	138601	138900	*	5.33932e-06	0.000499132	14.6465		bcl11aa		ENSDARG00000101866	ENSDART00000171359
8204	4	138901	139200	*	1.78611e-06	0.000208071	17.5226		bcl2		ENSDARG00000101866	ENSDART00000165549
8205	4	139501	139800	*	0.000140041	0.00601093	14.6828		blm		ENSDARG00000060537	ENSDART00000149000
8206	4	139801	140100	*	2.34035e-13	2.10253e-10	23.1099		bmper		ENSDARG00000060537	ENSDART00000149775
8452	4	4288801	4289100	*	0.000107268	0.00487702	13.6673		bnip3la		ENSDARG00000060537	ENSDART00000148998
8677	4	8871301	8871600	*	0.000138662	0.00597052	10.6913		c1qtnf1		ENSDARG00000060537	ENSDART00000085416
8678	4	8871601	8871900	*	9.24733e-06	0.000752919	11.1157		ca8		ENSDARG00000016706	ENSDART00000137670
8788	4	11561101	11561400	*	0.000227299	0.00849039	10.1629		cacna1g		ENSDARG00000016706	ENSDART00000139261
8975	4	17018101	17018400	*	4.28424e-12	2.76932e-09	22.2309		cacna1i		ENSDARG00000016706	ENSDART00000136282
9021	4	18615901	18616200	*	6.29162e-06	0.000561421	14.9024		cacng3b		ENSDARG00000016706	ENSDART00000022307
9821	4	49682401	49682700	*	3.11766e-06	0.000329841	16.0699		cadm1b		ENSDARG00000016706	ENSDART00000141973
10085	4	63194101	63194400	*	3.52677e-06	0.0003588	11.6561		cadm2a		ENSDARG00000055294	ENSDART00000077642
10975	5	3375301	3375600	*	2.13385e-13	2.05643e-10	20.3154		calcr		ENSDARG00000019856	ENSDART00000005086
11009	5	3809101	3809400	*	5.36527e-07	7.8559e-05	18.2526		casc3		ENSDARG00000018259	ENSDART00000104950
11210	5	6822001	6822300	*	0.000133117	0.00574578	13.2465		casp3a		ENSDARG00000042837	ENSDART00000062874
11389	5	10225201	10225500	*	6.87199e-10	2.67829e-07	16.4075		casz1		ENSDARG00000006370	ENSDART00000019029
11456	5	12401701	12402000	*	0	0	11.2988		cbfa2t2		ENSDARG00000006370	ENSDART00000138122
11497	5	13560301	13560600	*	3.19302e-05	0.00196459	10.7748		ccne1		ENSDARG00000006370	ENSDART00000145681
11567	5	15594601	15594900	*	0.000286999	0.00999492	13.3787		ccni		ENSDARG00000006370	ENSDART00000139697
11751	5	21998101	21998400	*	3.70495e-06	0.000372636	15.7943		cdh13		ENSDARG00000091902	ENSDART00000140767
12642	5	47609701	47610000	*	3.81604e-10	1.61814e-07	10.9653		cdkl5		ENSDARG00000091902	ENSDART00000139063
13104	5	62387401	62387700	*	4.1554e-05	0.00242036	13.4731		cdkn1ba		ENSDARG00000091902	ENSDART00000132755
13901	6	2248801	2249100	*	8.23141e-05	0.0040788	12.1581		cdx4		ENSDARG00000104361	ENSDART00000165609
14340	6	9857401	9857700	*	0	0	18.6888		celf3b		ENSDARG00000104361	ENSDART00000163726
14446	6	11988901	11989200	*	7.57631e-05	0.00382456	14.3739		cga		ENSDARG00000041098	ENSDART00000138806
14617	6	15572701	15573000	*	0.000246331	0.00891848	13.8158		ch1073-291c23.1		ENSDARG00000102832	ENSDART00000158503
14645	6	16189201	16189500	*	8.76492e-08	1.77999e-05	10.4664		clcn1a		ENSDARG00000102832	ENSDART00000162896
15044	6	24211501	24211800	*	7.22256e-12	4.45149e-09	13.5049		cldn15a		ENSDARG00000102832	ENSDART00000162052
15082	6	24932701	24933000	*	1.29755e-06	0.000161446	18.9489		clec14a		ENSDARG00000102832	ENSDART00000169621
15261	6	28974901	28975200	*	0	0	16.1397		clint1a		ENSDARG00000061352	ENSDART00000087426
15472	6	35343901	35344200	*	1.3803e-06	0.00016975	10.6177		cngb1a		ENSDARG00000061352	ENSDART00000132521
15482	6	35714101	35714400	*	6.75204e-05	0.00353296	14.0597		cnih4		ENSDARG00000077089	ENSDART00000142686
15764	6	44186701	44187000	*	7.78276e-08	1.62001e-05	11.5336		cntnap5b		ENSDARG00000077089	ENSDART00000144783
15930	6	49503901	49504200	*	4.81525e-07	7.27285e-05	21.9124		col18a1		ENSDARG00000077089	ENSDART00000110746
15935	6	49719901	49720200	*	3.18147e-07	5.26977e-05	12.337		col19a1		ENSDARG00000101980	ENSDART00000168830
15989	6	50697001	50697300	*	3.80156e-07	6.0443e-05	10.4439		col1a1a		ENSDARG00000101980	ENSDART00000160383
16139	6	53544001	53544300	*	0.000280139	0.00982053	13.8004		col4a5		ENSDARG00000101980	ENSDART00000163281
16396	6	57641401	57641700	*	0	0	27.7835		col9a1		ENSDARG00000101980	ENSDART00000168274
16399	6	57699301	57699600	*	3.72207e-11	1.87892e-08	10.6435		coro7		ENSDARG00000101980	ENSDART00000162610
16874	7	5649901	5650200	*	1.13989e-07	2.1812e-05	11.3599		cpb1		ENSDARG00000025468	ENSDART00000035676
17595	7	20682601	20682900	*	6.07445e-06	0.000547574	10.2527		crebl2		ENSDARG00000088878	ENSDART00000152908
17600	7	20879101	20879400	*	8.77235e-05	0.00423089	16.8492		cttn		ENSDARG00000088878	ENSDART00000162483
17801	7	27854101	27854400	*	1.11498e-05	0.000881471	24.6043		cuedc2		ENSDARG00000039098	ENSDART00000140012
18034	7	35392801	35393100	*	1.32515e-06	0.00016411	14.682		cul1b		ENSDARG00000089913	ENSDART00000153256
18303	7	45337201	45337500	*	2.93576e-07	4.92433e-05	17.8475		cux2b		ENSDARG00000089913	ENSDART00000123534
18336	7	46074301	46074600	*	8.85223e-07	0.000117302	21.5948		cxcr7b		ENSDARG00000070522	ENSDART00000145615
18342	7	46170901	46171200	*	1.27474e-06	0.000159733	11.0976		cybrd1		ENSDARG00000070522	ENSDART00000085216
18369	7	46819801	46820100	*	1.31632e-08	3.71123e-06	11.4552		cyp4t8		ENSDARG00000076401	ENSDART00000110126
18499	7	50973301	50973600	*	1.45439e-14	1.6402e-11	11.6109		cyp7a1a		ENSDARG00000042677	ENSDART00000157161
18691	7	56985901	56986200	*	1.76195e-05	0.00126375	11.6605		dbn1		ENSDARG00000042677	ENSDART00000062603
19506	7	74010001	74010300	*	4.35149e-05	0.00250581	16.1385		dck		ENSDARG00000042677	ENSDART00000166555
19795	8	4125301	4125600	*	1.96882e-07	3.5019e-05	14.0594		ddb1		ENSDARG00000009930	ENSDART00000135475
19803	8	4246501	4246800	*	5.86359e-07	8.38413e-05	15.3817		derl3		ENSDARG00000009930	ENSDART00000056369
19855	8	5083801	5084100	*	6.74158e-05	0.00353296	10.2463		dhrs11a		ENSDARG00000028845	ENSDART00000131471
19874	8	5386201	5386500	*	2.6803e-05	0.00174745	12.3545		dhrs13a.3		ENSDARG00000029911	ENSDART00000040065
19896	8	5803801	5804100	*	1.85117e-05	0.00131705	10.5495		diabloa		ENSDARG00000029911	ENSDART00000153732
20823	8	28960801	28961100	*	0.000142832	0.00608623	11.8091		diaph2		ENSDARG00000017905	ENSDART00000139702
20886	8	30874801	30875100	*	0	0	16.0088		disc1		ENSDARG00000017905	ENSDART00000140076
20983	8	33675301	33675600	*	1.12059e-06	0.000143469	11.3027		dla		ENSDARG00000017905	ENSDART00000005593
21771	8	49842601	49842900	*	0.000237226	0.00875117	14.2151		dnajc19		ENSDARG00000017905	ENSDART00000131927
21773	8	49850401	49850700	*	3.26412e-05	0.00199784	15.2767		dnal1		ENSDARG00000037030	ENSDART00000148257
22392	9	3281401	3281700	*	5.41928e-07	7.91313e-05	21.5501		dntt		ENSDARG00000037030	ENSDART00000002812
22407	9	3569701	3570000	*	3.44861e-06	0.000353562	16.8465		dock1		ENSDARG00000074337	ENSDART00000083807
22676	9	7998001	7998300	*	2.91309e-05	0.00183818	13.4372		dpyda		ENSDARG00000074337	ENSDART00000155438
23198	9	21374101	21374400	*	0.000182888	0.00726678	10.6473		dpydb		ENSDARG00000074337	ENSDART00000168708
23199	9	21374401	21374700	*	6.7113e-13	5.73757e-10	16.2628		drd4b		ENSDARG00000098622	ENSDART00000163991
23439	9	28677301	28677600	*	0.000100442	0.00468653	13.0963		drg1		ENSDARG00000098622	ENSDART00000170294
23440	9	28677601	28677900	*	8.18993e-07	0.000109622	12.8349		dync1i2a		ENSDARG00000098622	ENSDART00000169822
23666	9	36051901	36052200	*	2.74946e-08	6.90683e-06	11.0743		ebf1a		ENSDARG00000068214	ENSDART00000127854
23843	9	42226201	42226500	*	4.08372e-06	0.000406463	10.8143		ebf3		ENSDARG00000068214	ENSDART00000129351
24297	9	52191601	52191900	*	1.09261e-07	2.11362e-05	13.4094		edar		ENSDARG00000068214	ENSDART00000151202
24536	9	55988101	55988400	*	0.00017666	0.00707767	10.5233		efna2		ENSDARG00000068214	ENSDART00000075137
24622	10	631201	631500	*	4.64458e-08	1.06114e-05	13.8614		efnb3b		ENSDARG00000014215	ENSDART00000136754
24866	10	4168501	4168800	*	9.50755e-06	0.000769421	10.0957		egln3		ENSDARG00000014215	ENSDART00000169552
25215	10	11182201	11182500	*	7.56201e-06	0.000650683	10.5971		eif3hb		ENSDARG00000015240	ENSDART00000157385
25266	10	11967901	11968200	*	1.07157e-08	3.17306e-06	14.1209		eif3hb		ENSDARG00000015240	ENSDART00000127502
25328	10	12482401	12482700	*	2.11005e-08	5.5921e-06	16.8194		elfn2		ENSDARG00000015240	ENSDART00000010026
25543	10	17668801	17669100	*	0.000262145	0.00936313	10.1354		eno3		ENSDARG00000029018	ENSDART00000049061
25555	10	17773801	17774100	*	7.74824e-11	3.76781e-08	11.7684		enosf1		ENSDARG00000029018	ENSDART00000147220
25621	10	19710001	19710300	*	0	0	18.2685		enpp7		ENSDARG00000036292	ENSDART00000114973
25741	10	23196301	23196600	*	0.000147053	0.00619101	14.3847		epc1		ENSDARG00000036292	ENSDART00000052709
25790	10	24881101	24881400	*	9.82134e-05	0.00460687	11.9433		epm2a		ENSDARG00000006983	ENSDART00000148426
25809	10	25731301	25731600	*	3.63035e-05	0.0021722	16.0787		erh		ENSDARG00000006983	ENSDART00000024206
25878	10	27409801	27410100	*	0.000126983	0.00551241	19.0949		esrrb		ENSDARG00000040479	ENSDART00000155293
25882	10	27518401	27518700	*	6.55899e-05	0.00344797	17.1358		esrrga		ENSDARG00000040479	ENSDART00000053888
26040	10	32215201	32215500	*	0.000251356	0.0090726	12.8967		etnk1		ENSDARG00000040479	ENSDART00000059245
27090	11	4400401	4400700	*	7.49198e-05	0.00380737	16.9451		etv7		ENSDARG00000063631	ENSDART00000137398
27770	11	19338601	19338900	*	2.0043e-05	0.00139786	11.1288		faimb		ENSDARG00000063631	ENSDART00000093160
27843	11	21576601	21576900	*	1.20454e-05	0.000938917	14.0731		fam133b		ENSDARG00000062084	ENSDART00000041094
27864	11	22245901	22246200	*	3.29029e-08	8.0741e-06	19.7725		fam5ca		ENSDARG00000062084	ENSDART00000172628
28117	11	29983801	29984100	*	2.54792e-06	0.000279031	15.5024		fancl		ENSDARG00000036463	ENSDART00000052977
28655	11	40832101	40832400	*	0.000212867	0.00811116	12.4399		fat1		ENSDARG00000103533	ENSDART00000170420
28684	11	41150701	41151000	*	0.000150054	0.00628737	10.1734		fbxl14b		ENSDARG00000025535	ENSDART00000144702
29372	12	6907501	6907800	*	5.76579e-09	1.8522e-06	17.0611		fgf18a		ENSDARG00000025535	ENSDART00000169712
29423	12	7838401	7838700	*	5.12953e-05	0.00284998	13.5569		fgfr3		ENSDARG00000025535	ENSDART00000143818
29556	12	10469401	10469700	*	1.16663e-07	2.20845e-05	12.5614		fhit		ENSDARG00000068242	ENSDART00000140089
29704	12	14075401	14075700	*	1.11611e-08	3.26846e-06	14.0906		foxc1a		ENSDARG00000087759	ENSDART00000126759
30263	12	27691801	27692100	*	6.58197e-07	9.20513e-05	14.2462		foxi1		ENSDARG00000075189	ENSDART00000134035
30299	12	29105701	29106000	*	1.35454e-09	4.78646e-07	16.1741		foxi2		ENSDARG00000075189	ENSDART00000110136
30367	12	31299301	31299600	*	2.32288e-05	0.00156845	11.6243		foxp4		ENSDARG00000036558	ENSDART00000130434
30419	12	33073501	33073800	*	4.55334e-06	0.000446114	13.2427		fscn2a		ENSDARG00000036558	ENSDART00000097295
30435	12	33509101	33509400	*	4.96603e-13	4.38703e-10	12.221		fstl5		ENSDARG00000036558	ENSDART00000007058
30454	12	34160401	34160700	*	1.43214e-05	0.00107369	12.6451		ftr01		ENSDARG00000096073	ENSDART00000110976
30742	12	42321901	42322200	*	5.29843e-09	1.71244e-06	16.0236		fzd1		ENSDARG00000076163	ENSDART00000145979
30764	12	42665101	42665400	*	1.68958e-10	7.7203e-08	16.1652		fzd8a		ENSDARG00000012405	ENSDART00000009393
30810	12	43271401	43271700	*	0.000196976	0.00766566	10.9123		gadd45gip1		ENSDARG00000012405	ENSDART00000140586
31157	13	237901	238200	*	0.000123858	0.0054167	10.0403		gal3st1		ENSDARG00000012405	ENSDART00000047010
31210	13	791101	791400	*	3.0418e-05	0.00189236	10.7633		galcb		ENSDARG00000052063	ENSDART00000073827
31379	13	2955001	2955300	*	5.15096e-07	7.62638e-05	16.4486		gapvd1		ENSDARG00000052063	ENSDART00000108738
31759	13	8985901	8986200	*	2.59296e-08	6.63956e-06	11.8077		gatm		ENSDARG00000089616	ENSDART00000150575
31760	13	8986201	8986500	*	3.88578e-15	4.9039e-12	12.4018		gbx2		ENSDARG00000089616	ENSDART00000157475
31954	13	13440601	13440900	*	4.55191e-15	5.48346e-12	22.359		gc2		ENSDARG00000089616	ENSDART00000129961
32295	13	21075001	21075300	*	4.63012e-06	0.000447842	11.7541		gfra1a		ENSDARG00000089616	ENSDART00000171068
32458	13	26180101	26180400	*	6.41567e-07	9.04414e-05	20.1292		gfra2b		ENSDARG00000045442	ENSDART00000121576
32603	13	29649301	29649600	*	2.83114e-05	0.00180803	10.4379		ggctb		ENSDARG00000045442	ENSDART00000066833
32894	13	38269501	38269800	*	1.14688e-07	2.18669e-05	18.5156		glis3		ENSDARG00000045442	ENSDART00000169128
32905	13	38585401	38585700	*	1.2238e-12	9.979e-10	14.6983		glmnb		ENSDARG00000104049	ENSDART00000164855
32921	13	39004201	39004500	*	4.61162e-05	0.00262271	13.8137		gnal		ENSDARG00000104049	ENSDART00000172255
33423	13	48535801	48536100	*	9.22036e-06	0.000751878	13.3568		gnb1b		ENSDARG00000011777	ENSDART00000008696
33585	13	50813401	50813700	*	1.60661e-09	5.5297e-07	12.979		gpd2		ENSDARG00000011777	ENSDART00000017053
33841	14	2396101	2396400	*	6.92112e-07	9.55341e-05	13.7775		gpib		ENSDARG00000011777	ENSDART00000058468
33843	14	2450701	2451000	*	2.2424e-07	3.92269e-05	15.1892		gpr19		ENSDARG00000011777	ENSDART00000161117
34014	14	4966201	4966500	*	0.000284348	0.00993521	10.6739		grid2		ENSDARG00000039365	ENSDART00000131609
34017	14	4982101	4982400	*	1.11022e-16	1.73079e-13	16.1796		grnb		ENSDARG00000039365	ENSDART00000135265
34677	14	13850101	13850400	*	0	0	10.3324		gsc		ENSDARG00000039365	ENSDART00000123482
34750	14	15011701	15012000	*	3.8053e-05	0.00226055	10.9414		gsg1l		ENSDARG00000039365	ENSDART00000057528
35191	14	26923501	26923800	*	0	0	26.6093		gtf2f1		ENSDARG00000007691	ENSDART00000134947
35351	14	32632801	32633100	*	6.30935e-05	0.0033409	10.6059		gtpbp1l		ENSDARG00000007691	ENSDART00000141679
35423	14	34935901	34936200	*	1.36963e-06	0.00016883	19.4689		gxylt2		ENSDARG00000007691	ENSDART00000024691
35458	14	35794801	35795100	*	5.55405e-07	8.04344e-05	20.976		gyltl1b		ENSDARG00000007691	ENSDART00000122757
35571	14	39370801	39371100	*	5.959e-05	0.00320014	11.462		hao2		ENSDARG00000086345	ENSDART00000135006
35577	14	39521701	39522000	*	0.000191083	0.00749688	10.7469		has2		ENSDARG00000086345	ENSDART00000134378
35864	14	45546301	45546600	*	8.85768e-10	3.30632e-07	12.5619		hat1		ENSDARG00000086345	ENSDART00000142846
36010	14	48016201	48016500	*	0.000168759	0.00684719	11.1363		hel_dr4		ENSDARG00000095577	ENSDART00000102876
36165	14	50903401	50903700	*	5.00125e-05	0.00279041	14.1332		hey1		ENSDARG00000095577	ENSDART00000136599
36200	14	51316501	51316800	*	2.77354e-06	0.000298801	16.8887		hk2		ENSDARG00000095577	ENSDART00000076012
36576	15	4298701	4299000	*	1.98117e-06	0.00022583	12.3147		hnf4g		ENSDARG00000004964	ENSDART00000131949
36779	15	8343301	8343600	*	2.40918e-14	2.56572e-11	19.6908		hs6st1b		ENSDARG00000004964	ENSDART00000076955
36780	15	8343601	8343900	*	0	0	22.8585		hsd3b1		ENSDARG00000004964	ENSDART00000138614
37024	15	13160101	13160400	*	0.000276089	0.00970421	15.4924		hspb1		ENSDARG00000004964	ENSDART00000013654
37263	15	18665401	18665700	*	2.28919e-06	0.000255447	12.81		ighz		ENSDARG00000069113	ENSDART00000100310
37264	15	18665701	18666000	*	0	0	17.9335		ing4		ENSDARG00000069113	ENSDART00000133115
37310	15	19862401	19862700	*	0	0	11.8906		ints2		ENSDARG00000069113	ENSDART00000138222
37612	15	28154101	28154400	*	7.04892e-05	0.00363095	13.6837		irak1bp1		ENSDARG00000044807	ENSDART00000098499
37671	15	30100501	30100800	*	1.56709e-05	0.0011559	10.4318		irx1a		ENSDARG00000074431	ENSDART00000111161
37708	15	30771901	30772200	*	8.54478e-07	0.000113797	14.9063		irx3b		ENSDARG00000103083	ENSDART00000169773
38009	15	38571301	38571600	*	1.39232e-06	0.000170832	10.7194		irx5a		ENSDARG00000033871	ENSDART00000043251
38565	15	47644501	47644800	*	3.62577e-12	2.46387e-09	14.6732		irx6a		ENSDARG00000033871	ENSDART00000171400
38645	16	775801	776100	*	0	0	10.7453		isl2a		ENSDARG00000033871	ENSDART00000171115
38721	16	1767901	1768200	*	6.57734e-09	2.07517e-06	17.3028		kdrl		ENSDARG00000046090	ENSDART00000140537
38952	16	4804201	4804500	*	6.44044e-08	1.3765e-05	20.5151		kif1b		ENSDARG00000041137	ENSDART00000060304
39155	16	8150701	8151000	*	3.19496e-05	0.00196459	11.0191		klf13		ENSDARG00000041137	ENSDART00000152620
39457	16	15707701	15708000	*	1.29334e-06	0.000161301	13.6793		klf7b		ENSDARG00000104172	ENSDART00000163066
40457	16	40378501	40378800	*	6.22061e-05	0.00331045	13.0439		lbx2		ENSDARG00000104172	ENSDART00000162266
40604	16	43983601	43983900	*	7.42203e-05	0.00377544	15.3799		lingo1a		ENSDARG00000104172	ENSDART00000167213
40807	16	47996401	47996700	*	2.26263e-13	2.10225e-10	20.1925		lmbrd1		ENSDARG00000104172	ENSDART00000164119
41211	16	53846701	53847000	*	1.4958e-12	1.16595e-09	15.2226		lmo1		ENSDARG00000076060	ENSDART00000147443
41808	17	6069001	6069300	*	4.12992e-12	2.70252e-09	10.5682		lmx1bb		ENSDARG00000076060	ENSDART00000103298
41987	17	9452101	9452400	*	6.50006e-07	9.11462e-05	11.3923		lpar1		ENSDARG00000021895	ENSDART00000148922
42026	17	9995701	9996000	*	1.67986e-08	4.61347e-06	23.3601		lppr4b		ENSDARG00000021895	ENSDART00000121745
42027	17	9996001	9996300	*	7.62305e-08	1.59706e-05	12.1899		lrmp		ENSDARG00000021895	ENSDART00000030939
42336	17	18149701	18150000	*	4.09306e-12	2.70252e-09	19.8595		lrrc30		ENSDARG00000021895	ENSDART00000168707
42373	17	19316101	19316400	*	8.07996e-11	3.8934e-08	11.545		lrrtm4l2		ENSDARG00000010791	ENSDART00000012104
42503	17	24182701	24183000	*	2.02256e-11	1.08288e-08	24.2236		luzp2		ENSDARG00000010791	ENSDART00000126339
42688	17	29822101	29822400	*	1.72065e-09	5.88402e-07	14.6266		mafba		ENSDARG00000010791	ENSDART00000006180
42828	17	33585001	33585300	*	2.95564e-09	9.91535e-07	16.8061		mbd3a		ENSDARG00000044420	ENSDART00000065239
42987	17	38382601	38382900	*	3.21946e-06	0.000338583	10.8586		mbtps1		ENSDARG00000034042	ENSDART00000043651
43671	17	52362301	52362600	*	9.21544e-06	0.000751878	10.4611		med8		ENSDARG00000038540	ENSDART00000056245
43711	17	52623901	52624200	*	6.54769e-06	0.000580363	18.2236		mef2cb		ENSDARG00000099093	ENSDART00000169481
43788	18	62701	63000	*	2.16341e-05	0.00148153	11.9472		megf8		ENSDARG00000099093	ENSDART00000162888
43800	18	272101	272400	*	7.80003e-10	2.99592e-07	13.8589		meis2a		ENSDARG00000010267	ENSDART00000100133
43819	18	503101	503400	*	3.06541e-05	0.00190036	10.8804		mmp11a		ENSDARG00000010267	ENSDART00000124724
43903	18	1542601	1542900	*	3.75477e-12	2.51924e-09	22.2368		mmp16a		ENSDARG00000035820	ENSDART00000051974
44459	18	13814401	13814700	*	0.000106901	0.00487293	10.295		mnx2b		ENSDARG00000035820	ENSDART00000133699
44578	18	17831701	17832000	*	2.15018e-05	0.00147629	13.263		mppe1		ENSDARG00000039345	ENSDART00000057500
44604	18	18804001	18804300	*	0	0	19.8492		mrps23		ENSDARG00000078386	ENSDART00000160567
44685	18	21352201	21352500	*	0	0	21.2571		msi2b		ENSDARG00000078386	ENSDART00000161216
44690	18	21481201	21481500	*	2.37111e-06	0.000261833	11.9431		mtnr1bb		ENSDARG00000078386	ENSDART00000164878
44998	18	29950501	29950800	*	5.30777e-08	1.18208e-05	15.6867		musk		ENSDARG00000078386	ENSDART00000007756
45081	18	31478101	31478400	*	7.97813e-07	0.000108153	11.9969		mycb		ENSDARG00000099849	ENSDART00000164974
45298	18	33592501	33592800	*	4.16672e-07	6.51489e-05	11.9339		mycn		ENSDARG00000099849	ENSDART00000172171
45390	18	36335401	36335700	*	2.89533e-05	0.00183352	12.361		myl2b		ENSDARG00000099849	ENSDART00000163465
45444	18	37515901	37516200	*	0.000186517	0.00737228	11.0496		myo16		ENSDARG00000099849	ENSDART00000170631
45604	18	41568001	41568300	*	4.58886e-08	1.05295e-05	13.5499		myog		ENSDARG00000099088	ENSDART00000172063
45799	18	45242101	45242400	*	0.000197453	0.00767296	11.2332		myt1b		ENSDARG00000042277	ENSDART00000062003
45944	18	47407801	47408100	*	3.55247e-06	0.000360033	12.8239		ncam1a		ENSDARG00000032553	ENSDART00000149640
46157	18	50793301	50793600	*	1.77103e-05	0.00126855	10.2341		ncam1b		ENSDARG00000032553	ENSDART00000150063
46506	19	5238901	5239200	*	7.541e-05	0.00381036	20.4343		ncana		ENSDARG00000036116	ENSDART00000162861
46589	19	6755401	6755700	*	7.10235e-06	0.000624757	22.3009		ncoa2		ENSDARG00000036116	ENSDART00000172732
46712	19	9650101	9650400	*	1.01089e-05	0.000811398	11.5623		ndrg4		ENSDARG00000036116	ENSDART00000158906
47387	19	24722401	24722700	*	1.78735e-12	1.33433e-09	27.8784		ndst3		ENSDARG00000036116	ENSDART00000052434
47660	19	32281801	32282100	*	1.67683e-06	0.00019751	17.0145		necab2		ENSDARG00000039007	ENSDART00000145905
47975	19	40771501	40771800	*	7.53539e-05	0.00381036	14.4306		net1		ENSDARG00000039007	ENSDART00000145902
48283	19	46344901	46345200	*	0	0	18.6637		neurl1b		ENSDARG00000039007	ENSDART00000135298
49141	20	11058901	11059200	*	1.13809e-12	9.45044e-10	21.5847		neurod6a		ENSDARG00000039007	ENSDART00000132361
49496	20	17070001	17070300	*	3.00232e-06	0.000318911	10.9976		nfixb		ENSDARG00000039007	ENSDART00000135824
49630	20	20679601	20679900	*	6.48453e-07	9.11462e-05	17.1817		nfkb1		ENSDARG00000038359	ENSDART00000134042
49714	20	23043601	23043900	*	0	0	20.0261		ngf		ENSDARG00000038359	ENSDART00000135068
49860	20	28797901	28798200	*	5.98155e-05	0.00320576	14.3385		nkx2.1b		ENSDARG00000038359	ENSDART00000055956
49941	20	32127601	32127900	*	0.000281454	0.0098601	15.4826		nlgn3a		ENSDARG00000038359	ENSDART00000098412
49984	20	33548701	33549000	*	0.000234349	0.00867426	12.948		nme4		ENSDARG00000059044	ENSDART00000136436
50345	20	45495301	45495600	*	9.32935e-05	0.00445179	11.4501		nop16		ENSDARG00000059044	ENSDART00000160184
50372	20	45922801	45923100	*	7.63712e-06	0.000653961	15.0342		npffr1l2		ENSDARG00000032866	ENSDART00000101974
51354	21	5546401	5546700	*	3.04046e-11	1.56464e-08	19.2068		nrxn2a		ENSDARG00000004861	ENSDART00000009104
51369	21	5677501	5677800	*	8.66875e-06	0.000721287	10.5584		ntf3		ENSDARG00000004861	ENSDART00000126966
52040	21	23521501	23521800	*	0.000154622	0.00641791	12.094		ntpcr		ENSDARG00000019420	ENSDART00000017726
52235	21	28363201	28363500	*	0.000261107	0.00935922	10.6219		ntrk2a		ENSDARG00000019420	ENSDART00000143208
52322	21	31012501	31012800	*	1.11022e-16	1.73079e-13	16.0654		nufip2		ENSDARG00000089434	ENSDART00000122240
52323	21	31012801	31013100	*	1.5379e-08	4.26783e-06	12.4415		nup98		ENSDARG00000020814	ENSDART00000012023
52617	21	37131601	37131900	*	7.33799e-06	0.000636447	11.8371		odz4		ENSDARG00000013863	ENSDART00000135648
52786	21	40324501	40324800	*	1.28773e-08	3.68401e-06	13.1706		oprk1		ENSDARG00000013863	ENSDART00000089547
53707	22	7347601	7347900	*	2.00744e-06	0.000227711	13.7978		or101-1		ENSDARG00000013863	ENSDART00000140857
53976	22	13711801	13712100	*	2.72876e-06	0.000296387	14.9511		or129-1		ENSDARG00000013863	ENSDART00000136716
54010	22	14826601	14826900	*	4.54679e-08	1.05141e-05	15.7615		osgn1		ENSDARG00000013863	ENSDART00000147391
55112	22	37489201	37489500	*	1.18287e-08	3.44491e-06	15.778		ostf1		ENSDARG00000007885	ENSDART00000020946
55318	23	1388401	1388700	*	2.38525e-05	0.0015996	10.3774		otx1a		ENSDARG00000007885	ENSDART00000142483
55496	23	3486301	3486600	*	6.05536e-06	0.000547574	16.6005		otx1b		ENSDARG00000007885	ENSDART00000131283
55636	23	5222401	5222700	*	0.000115533	0.00515905	11.6855		oxr1a		ENSDARG00000045801	ENSDART00000067322
55781	23	7872601	7872900	*	2.19607e-05	0.00149587	16.2996		palmda		ENSDARG00000088048	ENSDART00000170629
56597	23	29176801	29177100	*	5.57634e-05	0.0030222	12.287		palmdb		ENSDARG00000088048	ENSDART00000123063
56615	23	29542501	29542800	*	1.00444e-07	1.97185e-05	13.965		pam16		ENSDARG00000004782	ENSDART00000156968
56688	23	31302901	31303200	*	2.82799e-05	0.00180803	11.7801		park7		ENSDARG00000004782	ENSDART00000125883
57010	23	38932801	38933100	*	3.3088e-06	0.000345239	11.7469		pax2a		ENSDARG00000004782	ENSDART00000013534
57412	23	44812201	44812500	*	4.43638e-06	0.000437078	16.6775		pax7a		ENSDARG00000078195	ENSDART00000110845
57738	24	4424101	4424400	*	3.4673e-06	0.000354792	21.7309		pcbp3		ENSDARG00000091481	ENSDART00000122732
57771	24	5041801	5042100	*	0.000163617	0.00669171	13.8315		pcdh15b		ENSDARG00000104566	ENSDART00000159423
57959	24	8853901	8854200	*	5.90566e-08	1.27247e-05	13.1113		pcdh19		ENSDARG00000069715	ENSDART00000101673
58176	24	14180101	14180400	*	0.000237675	0.00875459	16.344		pcdh2aa1		ENSDARG00000076120	ENSDART00000161485
58316	24	17288401	17288700	*	6.34e-10	2.50783e-07	10.9964		pcdh2aa3		ENSDARG00000076120	ENSDART00000114288
58511	24	23185801	23186100	*	7.14252e-06	0.000624757	13.2626		pcdh2ab1		ENSDARG00000059574	ENSDART00000082937
58579	24	24924601	24924900	*	0.000227921	0.00850764	12.4554		pcsk2		ENSDARG00000040198	ENSDART00000135479
58642	24	27268801	27269100	*	0.000146493	0.00617726	12.5614		pdcd10b		ENSDARG00000040198	ENSDART00000164851
58671	24	28051201	28051500	*	8.12531e-09	2.47516e-06	12.8255		pdzrn3b		ENSDARG00000040198	ENSDART00000159608
58732	24	29993401	29993700	*	5.32052e-12	3.35728e-09	10.7884		picalml		ENSDARG00000040198	ENSDART00000058796
58772	24	30748501	30748800	*	6.63025e-13	5.73757e-10	10.4875		pigo		ENSDARG00000003909	ENSDART00000100524
58790	24	31135501	31135800	*	1.89393e-05	0.00134096	11.6507		pim3		ENSDARG00000045444	ENSDART00000066835
58818	24	31626301	31626600	*	0	0	17.0372		pitpnb		ENSDARG00000039338	ENSDART00000133850
58876	24	32558401	32558700	*	2.22045e-16	3.26927e-13	12.2111		pitx2		ENSDARG00000016474	ENSDART00000028044
59011	24	35548201	35548500	*	7.70058e-06	0.000656215	10.3044		plek		ENSDARG00000090183	ENSDART00000113230
59073	24	36478801	36479100	*	0.000144475	0.00611111	14.2022		plk2a		ENSDARG00000090183	ENSDART00000161282
59354	24	41461201	41461500	*	2.05298e-11	1.08817e-08	15.1213		plod2		ENSDARG00000090183	ENSDART00000112854
59920	25	6703801	6704100	*	1.81498e-06	0.000210509	11.9003		pnp6		ENSDARG00000036239	ENSDART00000052641
60211	25	12986401	12986700	*	1.14109e-12	9.45044e-10	16.6354		pop4		ENSDARG00000036239	ENSDART00000148821
60326	25	15485701	15486000	*	4.40644e-05	0.00253046	14.9459		ppapdc1a		ENSDARG00000036239	ENSDART00000148950
60859	25	29043601	29043900	*	1.43683e-06	0.000175481	10.0169		ppfia4		ENSDARG00000036239	ENSDART00000148373
61072	25	32244001	32244300	*	3.33721e-06	0.000347519	10.1678		ppil2		ENSDARG00000036239	ENSDART00000148453
61118	25	33009901	33010200	*	9.27213e-07	0.00012165	10.8586		ppm1ab		ENSDARG00000036239	ENSDART00000166522
61217	25	33969301	33969600	*	6.08367e-05	0.00324735	15.8295		prdm14		ENSDARG00000002933	ENSDART00000015333
61402	25	36281701	36282000	*	1.33095e-07	2.47531e-05	25.3634		prkcbb		ENSDARG00000018329	ENSDART00000098648
61452	25	36872701	36873000	*	6.07603e-10	2.43983e-07	10.2938		prmt1		ENSDARG00000099732	ENSDART00000167916
									prox2		ENSDARG00000099732	ENSDART00000165310
									prss12		ENSDARG00000099732	ENSDART00000168955
									psma6b		ENSDARG00000044015	ENSDART00000148013
									psmd6		ENSDARG00000044015	ENSDART00000080430
									ptbp2a		ENSDARG00000005085	ENSDART00000150190
									ptbp3		ENSDARG00000005085	ENSDART00000014098
									pth2		ENSDARG00000005085	ENSDART00000150176
									ptk2ba		ENSDARG00000069726	ENSDART00000142833
									ptprea		ENSDARG00000069726	ENSDART00000164871
									ptprfb		ENSDARG00000010958	ENSDART00000014661
									ptprga		ENSDARG00000010958	ENSDART00000148925
									ptprmb		ENSDARG00000010958	ENSDART00000149428
									pvrl2l		ENSDARG00000045415	ENSDART00000140924
									qdpra		ENSDARG00000045415	ENSDART00000066782
									rab27a		ENSDARG00000104372	ENSDART00000172465
									rab32a		ENSDARG00000104372	ENSDART00000163867
									rabggtb		ENSDARG00000062430	ENSDART00000144028
									rac1		ENSDARG00000062430	ENSDART00000140453
									rad21a		ENSDARG00000062430	ENSDART00000090266
									rasgrp2		ENSDARG00000103826	ENSDART00000166345
									rbfox1		ENSDARG00000103826	ENSDART00000162513
									rcan1a		ENSDARG00000102226	ENSDART00000171845
									rfx3		ENSDARG00000055302	ENSDART00000141634
									rgs4		ENSDARG00000055302	ENSDART00000077647
									rgs6		ENSDARG00000025081	ENSDART00000105686
									rgs8		ENSDARG00000025081	ENSDART00000142264
									rhoga		ENSDARG00000059073	ENSDART00000138315
									rictora		ENSDARG00000059073	ENSDART00000082085
									rnf114		ENSDARG00000037390	ENSDART00000054408
									rnf168		ENSDARG00000032129	ENSDART00000026090
									robo1		ENSDARG00000032129	ENSDART00000151411
									rplp2		ENSDARG00000032129	ENSDART00000151475
									rps27.2		ENSDARG00000032129	ENSDART00000151211
									rraga		ENSDARG00000032129	ENSDART00000151196
									rras2		ENSDARG00000032129	ENSDART00000047660
									rs1		ENSDARG00000032129	ENSDART00000122357
									rspo3		ENSDARG00000032129	ENSDART00000111878
									rtn4r		ENSDARG00000042900	ENSDART00000122740
									s100b		ENSDARG00000044191	ENSDART00000064878
									s100v2		ENSDARG00000017058	ENSDART00000127953
									sall4		ENSDARG00000017058	ENSDART00000172328
									samm50l		ENSDARG00000017058	ENSDART00000015786
									scaper		ENSDARG00000027992	ENSDART00000136365
									scfd2		ENSDARG00000027992	ENSDART00000035428
									sec23a		ENSDARG00000027992	ENSDART00000133903
									sema4ab		ENSDARG00000027992	ENSDART00000122139
									sept7b		ENSDARG00000036987	ENSDART00000053754
									serpina1		ENSDARG00000034916	ENSDART00000044128
									setd3		ENSDARG00000070538	ENSDART00000103640
									si:ch1073-189o9.1		ENSDARG00000101482	ENSDART00000160690
									si:ch1073-291c23.2		ENSDARG00000071565	ENSDART00000144193
									si:ch211-113p18.3		ENSDARG00000071565	ENSDART00000066644
									si:ch211-145c1.1		ENSDARG00000071565	ENSDART00000164750
									si:ch211-165f21.4		ENSDARG00000071501	ENSDART00000105778
									si:ch211-214e3.5		ENSDARG00000069926	ENSDART00000061321
									si:ch211-216l23.1		ENSDARG00000041065	ENSDART00000060162
									si:ch211-217a12.1		ENSDARG00000041065	ENSDART00000149816
									si:ch211-226f6.1		ENSDARG00000041065	ENSDART00000152108
									si:ch211-234b19.1		ENSDARG00000096280	ENSDART00000151461
									si:ch211-239e6.4		ENSDARG00000096280	ENSDART00000151307
									si:ch211-239i4.3		ENSDARG00000030716	ENSDART00000045245
									si:ch211-253b1.4		ENSDARG00000069085	ENSDART00000143487
									si:ch211-260p9.3		ENSDARG00000069085	ENSDART00000023545
									si:ch211-283g2.1		ENSDARG00000036903	ENSDART00000053588
									si:ch211-69m14.1		ENSDARG00000036903	ENSDART00000146510
									si:ch73-249k16.4		ENSDARG00000036903	ENSDART00000133391
									si:ch73-265d7.2		ENSDARG00000101831	ENSDART00000162474
									si:ch73-389b16.2		ENSDARG00000101831	ENSDART00000161774
									si:ch73-74h11.1		ENSDARG00000101831	ENSDART00000166103
									si:ch73-7i4.2		ENSDARG00000101831	ENSDART00000170665
									si:dkey-175g6.5		ENSDARG00000031138	ENSDART00000042271
									si:dkey-187i8.2		ENSDARG00000031138	ENSDART00000158027
									si:dkey-193b15.9		ENSDARG00000034043	ENSDART00000043857
									si:dkey-203a12.2		ENSDARG00000034420	ENSDART00000045628
									si:dkey-238n5.3		ENSDARG00000003971	ENSDART00000012862
									si:dkey-242e21.3		ENSDARG00000105215	ENSDART00000170626
									si:dkey-25o1.6		ENSDARG00000105215	ENSDART00000164230
									si:dkey-276l13.3		ENSDARG00000037020	ENSDART00000141075
									si:dkey-27p18.5		ENSDARG00000037020	ENSDART00000146458
									si:dkey-33c12.3		ENSDARG00000037020	ENSDART00000053807
									si:dkey-46l15.1		ENSDARG00000037020	ENSDART00000164356
									si:dkey-47k20.3		ENSDARG00000037020	ENSDART00000050915
									si:dkey-57c15.1		ENSDARG00000037020	ENSDART00000165744
									si:dkey-76p7.5		ENSDARG00000061368	ENSDART00000087450
									si:dkey-89b17.4		ENSDARG00000043821	ENSDART00000104317
									si:dkey-9i5.4		ENSDARG00000043821	ENSDART00000064343
									si:dkey-9i5.5		ENSDARG00000025131	ENSDART00000031508
									si:dkeyp-67e1.2		ENSDARG00000034165	ENSDART00000149965
									si:dkeyp-67e6.5		ENSDARG00000034165	ENSDART00000041820
									si:dkeyp-85h7.1		ENSDARG00000104223	ENSDART00000162858
									siae		ENSDARG00000104223	ENSDART00000164380
									sipa1l1		ENSDARG00000104223	ENSDART00000157524
									six6b		ENSDARG00000104223	ENSDART00000160193
									slc10a3		ENSDARG00000034504	ENSDART00000139655
									slc20a1b		ENSDARG00000034504	ENSDART00000158921
									slc25a32b		ENSDARG00000034504	ENSDART00000044208
									slc27a2a		ENSDARG00000068365	ENSDART00000076420
									slc2a9l1		ENSDARG00000068365	ENSDART00000147131
									slc30a10		ENSDARG00000068365	ENSDART00000127460
									slc34a2b		ENSDARG00000099840	ENSDART00000158919
									smtla		ENSDARG00000099840	ENSDART00000172625
									snai2		ENSDARG00000045574	ENSDART00000135730
									sncb		ENSDARG00000045574	ENSDART00000131973
									snrka		ENSDARG00000045574	ENSDART00000145513
									snrpb		ENSDARG00000045574	ENSDART00000147853
									snx33		ENSDARG00000099386	ENSDART00000168789
									snx7		ENSDARG00000099386	ENSDART00000170658
									socs3a		ENSDARG00000068247	ENSDART00000111301
									socs3b		ENSDARG00000068247	ENSDART00000146120
									sod1		ENSDARG00000017121	ENSDART00000002309
									sox2		ENSDARG00000061774	ENSDART00000149508
									specc1		ENSDARG00000061774	ENSDART00000149829
									spon1b		ENSDARG00000061774	ENSDART00000088508
									spred1		ENSDARG00000014634	ENSDART00000019861
									sptb		ENSDARG00000014634	ENSDART00000114292
									srebf1		ENSDARG00000009418	ENSDART00000135911
									srl		ENSDARG00000009418	ENSDART00000138702
									stx16		ENSDARG00000009418	ENSDART00000163250
									stx1b		ENSDARG00000009418	ENSDART00000044083
									taar14j		ENSDARG00000079751	ENSDART00000142056
									tank		ENSDARG00000103934	ENSDART00000170671
									tardbpl		ENSDARG00000098240	ENSDART00000158273
									tarsl2		ENSDARG00000098240	ENSDART00000160507
									tbc1d23		ENSDARG00000098240	ENSDART00000171700
									tbx18		ENSDARG00000098240	ENSDART00000161414
									tcf7l2		ENSDARG00000077840	ENSDART00000144970
									tdrkh		ENSDARG00000077840	ENSDART00000143510
									tecta		ENSDARG00000077840	ENSDART00000033976
									tgm2l		ENSDARG00000026325	ENSDART00000077280
									tiam1a		ENSDARG00000030350	ENSDART00000114035
									timm10b		ENSDARG00000030350	ENSDART00000040368
									tlk1a		ENSDARG00000045416	ENSDART00000066783
									tmem26b		ENSDARG00000045416	ENSDART00000150185
									tpk1		ENSDARG00000033973	ENSDART00000135632
									tpm1		ENSDARG00000033973	ENSDART00000044452
									trib2		ENSDARG00000032614	ENSDART00000100194
									trim23		ENSDARG00000032614	ENSDART00000155212
									trim63		ENSDARG00000032614	ENSDART00000156584
									trmt6		ENSDARG00000032614	ENSDART00000156160
									tsc22d3		ENSDARG00000032614	ENSDART00000154714
									tspan14		ENSDARG00000032614	ENSDART00000156914
									ube2q2		ENSDARG00000032614	ENSDART00000050649
									ube2t		ENSDARG00000032614	ENSDART00000145918
									ube2v2		ENSDARG00000032614	ENSDART00000152414
									ugcg		ENSDARG00000032614	ENSDART00000154311
									uhmk1		ENSDARG00000032614	ENSDART00000152330
									unc13c		ENSDARG00000032614	ENSDART00000152790
									uqcrfs1		ENSDARG00000032614	ENSDART00000136901
									ush2a		ENSDARG00000032614	ENSDART00000142827
									uvrag		ENSDARG00000032614	ENSDART00000142982
									vav3b		ENSDARG00000086493	ENSDART00000078226
									vipr2		ENSDARG00000098764	ENSDART00000164568
									vrk1		ENSDARG00000098764	ENSDART00000166327
									vti1a		ENSDARG00000098764	ENSDART00000160265
									wnt11r		ENSDARG00000098764	ENSDART00000163740
									wrnip1		ENSDARG00000098764	ENSDART00000164299
									wwox		ENSDARG00000007241	ENSDART00000005143
									xbp1		ENSDARG00000007241	ENSDART00000135040
									xrcc5		ENSDARG00000006837	ENSDART00000024104
									yap1		ENSDARG00000053424	ENSDART00000137528
									zbtb10		ENSDARG00000053424	ENSDART00000101080
									zbtb16a		ENSDARG00000078582	ENSDART00000138167
									zfhx4		ENSDARG00000078582	ENSDART00000133063
									zfp64		ENSDARG00000078582	ENSDART00000109288
									zfpm2a		ENSDARG00000009438	ENSDART00000014062
									zfyve9a		ENSDARG00000009438	ENSDART00000167908
									zgc:101564		ENSDARG00000102879	ENSDART00000157612
									zgc:110191		ENSDARG00000102879	ENSDART00000164117
									zgc:110204		ENSDARG00000102879	ENSDART00000165427
									zgc:112294		ENSDARG00000056181	ENSDART00000017229
									zgc:112426		ENSDARG00000056181	ENSDART00000132570
									zgc:113025		ENSDARG00000056181	ENSDART00000101117
									zgc:113295		ENSDARG00000056181	ENSDART00000143661
									zgc:136791		ENSDARG00000056181	ENSDART00000145469
									zgc:152954		ENSDARG00000056181	ENSDART00000156658
									zgc:152977		ENSDARG00000056181	ENSDART00000157454
									zgc:153039		ENSDARG00000007220	ENSDART00000142010
									zgc:153067		ENSDARG00000007220	ENSDART00000146853
									zgc:153372		ENSDARG00000007220	ENSDART00000136208
									zgc:154085		ENSDARG00000007220	ENSDART00000019006
									zgc:154142		ENSDARG00000017929	ENSDART00000124740
									zgc:158824		ENSDARG00000017929	ENSDART00000124181
									zgc:162298		ENSDARG00000103937	ENSDART00000164297
									zgc:165627		ENSDARG00000103937	ENSDART00000169129
									zgc:171544		ENSDARG00000103937	ENSDART00000164621
									zgc:171579		ENSDARG00000103937	ENSDART00000169119
									zgc:171599		ENSDARG00000103937	ENSDART00000163735
									zgc:172282		ENSDARG00000103937	ENSDART00000160234
									zgc:173837		ENSDARG00000103937	ENSDART00000160466
									zgc:175145		ENSDARG00000041776	ENSDART00000146084
									zgc:195081		ENSDARG00000041776	ENSDART00000061232
									zgc:195633		ENSDARG00000056745	ENSDART00000140161
									zgc:55870		ENSDARG00000056745	ENSDART00000144523
									zgc:56676		ENSDARG00000056745	ENSDART00000100853
									zgc:64190		ENSDARG00000032765	ENSDART00000049066
									zgc:77938		ENSDARG00000032765	ENSDART00000002682
									zgc:92445		ENSDARG00000032765	ENSDART00000144452
									zgc:92902		ENSDARG00000032765	ENSDART00000150705
									zic4		ENSDARG00000032765	ENSDART00000150468
									znf423		ENSDARG00000032765	ENSDART00000170136
									znf536		ENSDARG00000099694	ENSDART00000161123
									zranb1b		ENSDARG00000099694	ENSDART00000167146
											ENSDARG00000099694	ENSDART00000164841
											ENSDARG00000040008	ENSDART00000058530
											ENSDARG00000040008	ENSDART00000098859
											ENSDARG00000061836	ENSDART00000139001
											ENSDARG00000061836	ENSDART00000090235
											ENSDARG00000061836	ENSDART00000044670
											ENSDARG00000105261	ENSDART00000169456
											ENSDARG00000105261	ENSDART00000164967
											ENSDARG00000104786	ENSDART00000168749
											ENSDARG00000104786	ENSDART00000168320
											ENSDARG00000088390	ENSDART00000109818
											ENSDARG00000088390	ENSDART00000139835
											ENSDARG00000088390	ENSDART00000123002
											ENSDARG00000044402	ENSDART00000065208
											ENSDARG00000062631	ENSDART00000135731
											ENSDARG00000062631	ENSDART00000090788
											ENSDARG00000061454	ENSDART00000141629
											ENSDARG00000061454	ENSDART00000132583
											ENSDARG00000061454	ENSDART00000134196
											ENSDARG00000061454	ENSDART00000087657
											ENSDARG00000061454	ENSDART00000164458
											ENSDARG00000059043	ENSDART00000082046
											ENSDARG00000021853	ENSDART00000035018
											ENSDARG00000021853	ENSDART00000132895
											ENSDARG00000059897	ENSDART00000131732
											ENSDARG00000059897	ENSDART00000140574
											ENSDARG00000059897	ENSDART00000083790
											ENSDARG00000069066	ENSDART00000100214
											ENSDARG00000069066	ENSDART00000154173
											ENSDARG00000074955	ENSDART00000136068
											ENSDARG00000074955	ENSDART00000142320
											ENSDARG00000074955	ENSDART00000130950
											ENSDARG00000074955	ENSDART00000126383
											ENSDARG00000074955	ENSDART00000007981
											ENSDARG00000074955	ENSDART00000162500
											ENSDARG00000006894	ENSDART00000009326
											ENSDARG00000013014	ENSDART00000143648
											ENSDARG00000013014	ENSDART00000013359
											ENSDARG00000102669	ENSDART00000170808
											ENSDARG00000052279	ENSDART00000074100
											ENSDARG00000091555	ENSDART00000168698
											ENSDARG00000091555	ENSDART00000168556
											ENSDARG00000091555	ENSDART00000157402
											ENSDARG00000091555	ENSDART00000128684
											ENSDARG00000030703	ENSDART00000006538
											ENSDARG00000030703	ENSDART00000150420
											ENSDARG00000094992	ENSDART00000064083
											ENSDARG00000101325	ENSDART00000159249
											ENSDARG00000001913	ENSDART00000137848
											ENSDARG00000001913	ENSDART00000006817
											ENSDARG00000102822	ENSDART00000165013
											ENSDARG00000034826	ENSDART00000041531
											ENSDARG00000034826	ENSDART00000140011
											ENSDARG00000034826	ENSDART00000147834
											ENSDARG00000028148	ENSDART00000076998
											ENSDARG00000028148	ENSDART00000138332
											ENSDARG00000028148	ENSDART00000141310
											ENSDARG00000028148	ENSDART00000139782
											ENSDARG00000028148	ENSDART00000134330
											ENSDARG00000028148	ENSDART00000132064
											ENSDARG00000028148	ENSDART00000144443
											ENSDARG00000028148	ENSDART00000133796
											ENSDARG00000028148	ENSDART00000134424
											ENSDARG00000028148	ENSDART00000132004
											ENSDARG00000028148	ENSDART00000076992
											ENSDARG00000028148	ENSDART00000160921
											ENSDARG00000028148	ENSDART00000160944
											ENSDARG00000100398	ENSDART00000169817
											ENSDARG00000100398	ENSDART00000162157
											ENSDARG00000100398	ENSDART00000172008
											ENSDARG00000100398	ENSDART00000170657
											ENSDARG00000054378	ENSDART00000132930
											ENSDARG00000054378	ENSDART00000015267
											ENSDARG00000054378	ENSDART00000148317
											ENSDARG00000054378	ENSDART00000134431
											ENSDARG00000054378	ENSDART00000144448
											ENSDARG00000054378	ENSDART00000048893
											ENSDARG00000008127	ENSDART00000106391
											ENSDARG00000008127	ENSDART00000152322
											ENSDARG00000008127	ENSDART00000171511
											ENSDARG00000008127	ENSDART00000171846
											ENSDARG00000008127	ENSDART00000166531
											ENSDARG00000034344	ENSDART00000149443
											ENSDARG00000034344	ENSDART00000173398
											ENSDARG00000037695	ENSDART00000114302
											ENSDARG00000071904	ENSDART00000106704
											ENSDARG00000071904	ENSDART00000161674
											ENSDARG00000019451	ENSDART00000129866
											ENSDARG00000019451	ENSDART00000169931
											ENSDARG00000012591	ENSDART00000019063
											ENSDARG00000073869	ENSDART00000114330
											ENSDARG00000073869	ENSDART00000157215
											ENSDARG00000011743	ENSDART00000135044
											ENSDARG00000055129	ENSDART00000077445
											ENSDARG00000055129	ENSDART00000108692
											ENSDARG00000036005	ENSDART00000052268
											ENSDARG00000036005	ENSDART00000123086
											ENSDARG00000036194	ENSDART00000148319
											ENSDARG00000036194	ENSDART00000173243
											ENSDARG00000036194	ENSDART00000052569
											ENSDARG00000036194	ENSDART00000137652
											ENSDARG00000104325	ENSDART00000166598
											ENSDARG00000104325	ENSDART00000171872
											ENSDARG00000090752	ENSDART00000125299
											ENSDARG00000011821	ENSDART00000128182
											ENSDARG00000011821	ENSDART00000140035
											ENSDARG00000011821	ENSDART00000005901
											ENSDARG00000011821	ENSDART00000106488
											ENSDARG00000040942	ENSDART00000060001
											ENSDARG00000040942	ENSDART00000136285
											ENSDARG00000101472	ENSDART00000163098
											ENSDARG00000101472	ENSDART00000165691
											ENSDARG00000101472	ENSDART00000167670
											ENSDARG00000053205	ENSDART00000112567
											ENSDARG00000053205	ENSDART00000170521
											ENSDARG00000002016	ENSDART00000051663
											ENSDARG00000002016	ENSDART00000161372
											ENSDARG00000002016	ENSDART00000171339
											ENSDARG00000002016	ENSDART00000025368
											ENSDARG00000043250	ENSDART00000063492
											ENSDARG00000045371	ENSDART00000123674
											ENSDARG00000045371	ENSDART00000168059
											ENSDARG00000045371	ENSDART00000066720
											ENSDARG00000022254	ENSDART00000029451
											ENSDARG00000010246	ENSDART00000012630
											ENSDARG00000010246	ENSDART00000035545
											ENSDARG00000041952	ENSDART00000114931
											ENSDARG00000041952	ENSDART00000165167
											ENSDARG00000061830	ENSDART00000140263
											ENSDARG00000061830	ENSDART00000088653
											ENSDARG00000013966	ENSDART00000012859
											ENSDARG00000013966	ENSDART00000171628
											ENSDARG00000070674	ENSDART00000103987
											ENSDARG00000101947	ENSDART00000168540
											ENSDARG00000101947	ENSDART00000171482
											ENSDARG00000101947	ENSDART00000162920
											ENSDARG00000043757	ENSDART00000146727
											ENSDARG00000043757	ENSDART00000040308
											ENSDARG00000022951	ENSDART00000033691
											ENSDARG00000022841	ENSDART00000151908
											ENSDARG00000022841	ENSDART00000028407
											ENSDARG00000015891	ENSDART00000004122
											ENSDARG00000015891	ENSDART00000169949
											ENSDARG00000005754	ENSDART00000083314
											ENSDARG00000005754	ENSDART00000133709
											ENSDARG00000005754	ENSDART00000155124
											ENSDARG00000005754	ENSDART00000166518
											ENSDARG00000045006	ENSDART00000092552
											ENSDARG00000063390	ENSDART00000170952
											ENSDARG00000063390	ENSDART00000144571
											ENSDARG00000040190	ENSDART00000058789
											ENSDARG00000103935	ENSDART00000170555
											ENSDARG00000103935	ENSDART00000165301
											ENSDARG00000029036	ENSDART00000034248
											ENSDARG00000029036	ENSDART00000152898
											ENSDARG00000029036	ENSDART00000152970
											ENSDARG00000029036	ENSDART00000153182
											ENSDARG00000068587	ENSDART00000099247
											ENSDARG00000068587	ENSDART00000099248
											ENSDARG00000068587	ENSDART00000134495
											ENSDARG00000068587	ENSDART00000165590
											ENSDARG00000006092	ENSDART00000005927
											ENSDARG00000006092	ENSDART00000168069
											ENSDARG00000062328	ENSDART00000132844
											ENSDARG00000062328	ENSDART00000089980
											ENSDARG00000014746	ENSDART00000122037
											ENSDARG00000014746	ENSDART00000150888
											ENSDARG00000014746	ENSDART00000151143
											ENSDARG00000014746	ENSDART00000055534
											ENSDARG00000014746	ENSDART00000151546
											ENSDARG00000014746	ENSDART00000151178
											ENSDARG00000014746	ENSDART00000165936
											ENSDARG00000003109	ENSDART00000020638
											ENSDARG00000003109	ENSDART00000134447
											ENSDARG00000003109	ENSDART00000138963
											ENSDARG00000003109	ENSDART00000144141
											ENSDARG00000014550	ENSDART00000144882
											ENSDARG00000014550	ENSDART00000144234
											ENSDARG00000014550	ENSDART00000041236
											ENSDARG00000014550	ENSDART00000171171
											ENSDARG00000070047	ENSDART00000102483
											ENSDARG00000070047	ENSDART00000133783
											ENSDARG00000015627	ENSDART00000135513
											ENSDARG00000015627	ENSDART00000075489
											ENSDARG00000070037	ENSDART00000102461
											ENSDARG00000068653	ENSDART00000152363
											ENSDARG00000100867	ENSDART00000164844
											ENSDARG00000100867	ENSDART00000157765
											ENSDARG00000009886	ENSDART00000019667
											ENSDARG00000105172	ENSDART00000157583
											ENSDARG00000026784	ENSDART00000097134
											ENSDARG00000026784	ENSDART00000076098
											ENSDARG00000026784	ENSDART00000034683
											ENSDARG00000101406	ENSDART00000166238
											ENSDARG00000055475	ENSDART00000077834
											ENSDARG00000055475	ENSDART00000139964
											ENSDARG00000055475	ENSDART00000134604
											ENSDARG00000100513	ENSDART00000167033
											ENSDARG00000104149	ENSDART00000164376
											ENSDARG00000104149	ENSDART00000172180
											ENSDARG00000036252	ENSDART00000052656
											ENSDARG00000070081	ENSDART00000058578
											ENSDARG00000070081	ENSDART00000132140
											ENSDARG00000090035	ENSDART00000157043
											ENSDARG00000090035	ENSDART00000163139
											ENSDARG00000090035	ENSDART00000031265
											ENSDARG00000057598	ENSDART00000080306
											ENSDARG00000070702	ENSDART00000132430
											ENSDARG00000070702	ENSDART00000104083
											ENSDARG00000044485	ENSDART00000065331
											ENSDARG00000039681	ENSDART00000058007
											ENSDARG00000023104	ENSDART00000156145
											ENSDARG00000023104	ENSDART00000156190
											ENSDARG00000023104	ENSDART00000153530
											ENSDARG00000023104	ENSDART00000103324
											ENSDARG00000040005	ENSDART00000058527
											ENSDARG00000040005	ENSDART00000131132
											ENSDARG00000104230	ENSDART00000160156
											ENSDARG00000104230	ENSDART00000168055
											ENSDARG00000104230	ENSDART00000169522
											ENSDARG00000062352	ENSDART00000140732
											ENSDARG00000062352	ENSDART00000090081
											ENSDARG00000052673	ENSDART00000148631
											ENSDARG00000052673	ENSDART00000150132
											ENSDARG00000052673	ENSDART00000149771
											ENSDARG00000052673	ENSDART00000149723
											ENSDARG00000052673	ENSDART00000169662
											ENSDARG00000052673	ENSDART00000074575
											ENSDARG00000090286	ENSDART00000113927
											ENSDARG00000090286	ENSDART00000153667
											ENSDARG00000016513	ENSDART00000022758
											ENSDARG00000016513	ENSDART00000127259
											ENSDARG00000104054	ENSDART00000143250
											ENSDARG00000089107	ENSDART00000122292
											ENSDARG00000074869	ENSDART00000147058
											ENSDARG00000074869	ENSDART00000142695
											ENSDARG00000074869	ENSDART00000140326
											ENSDARG00000074869	ENSDART00000136340
											ENSDARG00000074869	ENSDART00000133731
											ENSDARG00000074869	ENSDART00000109634
											ENSDARG00000087835	ENSDART00000137552
											ENSDARG00000042063	ENSDART00000139867
											ENSDARG00000042063	ENSDART00000102739
											ENSDARG00000093835	ENSDART00000145458
											ENSDARG00000093835	ENSDART00000142499
											ENSDARG00000074270	ENSDART00000153175
											ENSDARG00000059707	ENSDART00000146133
											ENSDARG00000059707	ENSDART00000083296
											ENSDARG00000055642	ENSDART00000078033
											ENSDARG00000055642	ENSDART00000152629
											ENSDARG00000094038	ENSDART00000139389
											ENSDARG00000095705	ENSDART00000173438
											ENSDARG00000095705	ENSDART00000141386
											ENSDARG00000095705	ENSDART00000137798
											ENSDARG00000095705	ENSDART00000172976
											ENSDARG00000095705	ENSDART00000148271
											ENSDARG00000095705	ENSDART00000171450
											ENSDARG00000092862	ENSDART00000137506
											ENSDARG00000092862	ENSDART00000131555
											ENSDARG00000092862	ENSDART00000143404
											ENSDARG00000046091	ENSDART00000132130
											ENSDARG00000046091	ENSDART00000049197
											ENSDARG00000075942	ENSDART00000135133
											ENSDARG00000075942	ENSDART00000113280
											ENSDARG00000040005	ENSDART00000058527
											ENSDARG00000040005	ENSDART00000131132
											ENSDARG00000093336	ENSDART00000134639
											ENSDARG00000093336	ENSDART00000132916
											ENSDARG00000039385	ENSDART00000143688
											ENSDARG00000039385	ENSDART00000042430
											ENSDARG00000103802	ENSDART00000170915
											ENSDARG00000103802	ENSDART00000158037
											ENSDARG00000062750	ENSDART00000148312
											ENSDARG00000093998	ENSDART00000136985
											ENSDARG00000003984	ENSDART00000135890
											ENSDARG00000003984	ENSDART00000022170
											ENSDARG00000096624	ENSDART00000152274
											ENSDARG00000102271	ENSDART00000169309
											ENSDARG00000101252	ENSDART00000171049
											ENSDARG00000075723	ENSDART00000134498
											ENSDARG00000058145	ENSDART00000150998
											ENSDARG00000058145	ENSDART00000030246
											ENSDARG00000058145	ENSDART00000162236
											ENSDARG00000068624	ENSDART00000133174
											ENSDARG00000068624	ENSDART00000099325
											ENSDARG00000057881	ENSDART00000137364
											ENSDARG00000029635	ENSDART00000133276
											ENSDARG00000029635	ENSDART00000059447
											ENSDARG00000105115	ENSDART00000161215
											ENSDARG00000014939	ENSDART00000141221
											ENSDARG00000014939	ENSDART00000140401
											ENSDARG00000014939	ENSDART00000165729
											ENSDARG00000014939	ENSDART00000168635
											ENSDARG00000075545	ENSDART00000151324
											ENSDARG00000075545	ENSDART00000151310
											ENSDARG00000075545	ENSDART00000138011
											ENSDARG00000075545	ENSDART00000150740
											ENSDARG00000075545	ENSDART00000108541
											ENSDARG00000092720	ENSDART00000142684
											ENSDARG00000092720	ENSDART00000127763
											ENSDARG00000098260	ENSDART00000171733
											ENSDARG00000040527	ENSDART00000059311
											ENSDARG00000040527	ENSDART00000163912
											ENSDARG00000020134	ENSDART00000114611
											ENSDARG00000031316	ENSDART00000125039
											ENSDARG00000103220	ENSDART00000163178
											ENSDARG00000103220	ENSDART00000163092
											ENSDARG00000010641	ENSDART00000039969
											ENSDARG00000010641	ENSDART00000138559
											ENSDARG00000010641	ENSDART00000132033
											ENSDARG00000010641	ENSDART00000170453
											ENSDARG00000026835	ENSDART00000032309
											ENSDARG00000026835	ENSDART00000131576
											ENSDARG00000036237	ENSDART00000052638
											ENSDARG00000036237	ENSDART00000150112
											ENSDARG00000070672	ENSDART00000103983
											ENSDARG00000070672	ENSDART00000158328
											ENSDARG00000103983	ENSDART00000166701
											ENSDARG00000036864	ENSDART00000053527
											ENSDARG00000036864	ENSDART00000115189
											ENSDARG00000036864	ENSDART00000159263
											ENSDARG00000038191	ENSDART00000128189
											ENSDARG00000040046	ENSDART00000058571
											ENSDARG00000104945	ENSDART00000158723
											ENSDARG00000070832	ENSDART00000104323
											ENSDARG00000011125	ENSDART00000011663
											ENSDARG00000014954	ENSDART00000009971
											ENSDARG00000014954	ENSDART00000132927
											ENSDARG00000105185	ENSDART00000168723
											ENSDARG00000105185	ENSDART00000162328
											ENSDARG00000105185	ENSDART00000164187
											ENSDARG00000025428	ENSDART00000033716
											ENSDARG00000104400	ENSDART00000164137
											ENSDARG00000026611	ENSDART00000037904
											ENSDARG00000026611	ENSDART00000153127
											ENSDARG00000043848	ENSDART00000064376
											ENSDARG00000043848	ENSDART00000135058
											ENSDARG00000070913	ENSDART00000104493
											ENSDARG00000029480	ENSDART00000137052
											ENSDARG00000029480	ENSDART00000047143
											ENSDARG00000023694	ENSDART00000137375
											ENSDARG00000023694	ENSDART00000031828
											ENSDARG00000041449	ENSDART00000060764
											ENSDARG00000030490	ENSDART00000145147
											ENSDARG00000030490	ENSDART00000040627
											ENSDARG00000067607	ENSDART00000092665
											ENSDARG00000104587	ENSDART00000159393
											ENSDARG00000104587	ENSDART00000165131
											ENSDARG00000104587	ENSDART00000158163
											ENSDARG00000104587	ENSDART00000171272
											ENSDARG00000003307	ENSDART00000155934
											ENSDARG00000003307	ENSDART00000154738
											ENSDARG00000003307	ENSDART00000002693
											ENSDARG00000000503	ENSDART00000081951
											ENSDARG00000000503	ENSDART00000163537
											ENSDARG00000075828	ENSDART00000152872
											ENSDARG00000075828	ENSDART00000114807
											ENSDARG00000067723	ENSDART00000148918
											ENSDARG00000103688	ENSDART00000167034
											ENSDARG00000004452	ENSDART00000139223
											ENSDARG00000004452	ENSDART00000141928
											ENSDARG00000004452	ENSDART00000126681
											ENSDARG00000004452	ENSDART00000027255
											ENSDARG00000092774	ENSDART00000147430
											ENSDARG00000092774	ENSDART00000165180
											ENSDARG00000044357	ENSDART00000065138
											ENSDARG00000044357	ENSDART00000126524
											ENSDARG00000036930	ENSDART00000103448
											ENSDARG00000004415	ENSDART00000153068
											ENSDARG00000004415	ENSDART00000009237
											ENSDARG00000004415	ENSDART00000122972
											ENSDARG00000004415	ENSDART00000005562
											ENSDARG00000004415	ENSDART00000031408
											ENSDARG00000004415	ENSDART00000125046
											ENSDARG00000004415	ENSDART00000133854
											ENSDARG00000004415	ENSDART00000145967
											ENSDARG00000004415	ENSDART00000128703
											ENSDARG00000004415	ENSDART00000121527
											ENSDARG00000053474	ENSDART00000142329
											ENSDARG00000053474	ENSDART00000009794
											ENSDARG00000053474	ENSDART00000136617
											ENSDARG00000059558	ENSDART00000149979
											ENSDARG00000059558	ENSDART00000082896
											ENSDARG00000093381	ENSDART00000167624
											ENSDARG00000093381	ENSDART00000142422
											ENSDARG00000093381	ENSDART00000131965
											ENSDARG00000078430	ENSDART00000143978
											ENSDARG00000078430	ENSDART00000131640
											ENSDARG00000078430	ENSDART00000138262
											ENSDARG00000078430	ENSDART00000110751
											ENSDARG00000043898	ENSDART00000064463
											ENSDARG00000042467	ENSDART00000130861
											ENSDARG00000042467	ENSDART00000123074
											ENSDARG00000042467	ENSDART00000147650
											ENSDARG00000014682	ENSDART00000020995
											ENSDARG00000038040	ENSDART00000055443
											ENSDARG00000038040	ENSDART00000140994
											ENSDARG00000038040	ENSDART00000172056
											ENSDARG00000068179	ENSDART00000098424
											ENSDARG00000069420	ENSDART00000127581
											ENSDARG00000042344	ENSDART00000062092
											ENSDARG00000075666	ENSDART00000054115
											ENSDARG00000055938	ENSDART00000078352
											ENSDARG00000013990	ENSDART00000155676
											ENSDARG00000013990	ENSDART00000155506
											ENSDARG00000013990	ENSDART00000124645
											ENSDARG00000063285	ENSDART00000123191
											ENSDARG00000028198	ENSDART00000026578
											ENSDARG00000058221	ENSDART00000047954
											ENSDARG00000059575	ENSDART00000082940
											ENSDARG00000101233	ENSDART00000157535
											ENSDARG00000007745	ENSDART00000006868
											ENSDARG00000029482	ENSDART00000086201
											ENSDARG00000029482	ENSDART00000166537
											ENSDARG00000029482	ENSDART00000171767
											ENSDARG00000023815	ENSDART00000134056
											ENSDARG00000023815	ENSDART00000028161
											ENSDARG00000023815	ENSDART00000129395
											ENSDARG00000073713	ENSDART00000156535
											ENSDARG00000075962	ENSDART00000110059
											ENSDARG00000075962	ENSDART00000142828
											ENSDARG00000075962	ENSDART00000143414
											ENSDARG00000075962	ENSDART00000167782
											ENSDARG00000075962	ENSDART00000153480
											ENSDARG00000012353	ENSDART00000122639
											ENSDARG00000012353	ENSDART00000166042
											ENSDARG00000018006	ENSDART00000152111
											ENSDARG00000018006	ENSDART00000045991
											ENSDARG00000045065	ENSDART00000066256
											ENSDARG00000045065	ENSDART00000153172
											ENSDARG00000014796	ENSDART00000099880
											ENSDARG00000005218	ENSDART00000004848
											ENSDARG00000007614	ENSDART00000150173
											ENSDARG00000007614	ENSDART00000150178
											ENSDARG00000035622	ENSDART00000124002
											ENSDARG00000035622	ENSDART00000124467
											ENSDARG00000035622	ENSDART00000139390
											ENSDARG00000035622	ENSDART00000051649
											ENSDARG00000099298	ENSDART00000167922
											ENSDARG00000099298	ENSDART00000166564
											ENSDARG00000099298	ENSDART00000162090
											ENSDARG00000099298	ENSDART00000172534
											ENSDARG00000099298	ENSDART00000164924
											ENSDARG00000068401	ENSDART00000098914
											ENSDARG00000077101	ENSDART00000113797
											ENSDARG00000007184	ENSDART00000140284
											ENSDARG00000007184	ENSDART00000134103
											ENSDARG00000007184	ENSDART00000007806
											ENSDARG00000075542	ENSDART00000135846
											ENSDARG00000075542	ENSDART00000112256
											ENSDARG00000061147	ENSDART00000086879
											ENSDARG00000040123	ENSDART00000141941
											ENSDARG00000040123	ENSDART00000151936
											ENSDARG00000040123	ENSDART00000104583
											ENSDARG00000040123	ENSDART00000058685
											ENSDARG00000101903	ENSDART00000168627
											ENSDARG00000070621	ENSDART00000091182
											ENSDARG00000070621	ENSDART00000162251
											ENSDARG00000070621	ENSDART00000103883
											ENSDARG00000070621	ENSDART00000136265
											ENSDARG00000030632	ENSDART00000042221
											ENSDARG00000013389	ENSDART00000014454
											ENSDARG00000010602	ENSDART00000018047
											ENSDARG00000074768	ENSDART00000168153
											ENSDARG00000074768	ENSDART00000106590
											ENSDARG00000074768	ENSDART00000172368
											ENSDARG00000091320	ENSDART00000144759
											ENSDARG00000091320	ENSDART00000129831
											ENSDARG00000077178	ENSDART00000124562
											ENSDARG00000077178	ENSDART00000106163
											ENSDARG00000077178	ENSDART00000152672
											ENSDARG00000077178	ENSDART00000152806
											ENSDARG00000077178	ENSDART00000162671
											ENSDARG00000102724	ENSDART00000159844
											ENSDARG00000068967	ENSDART00000099958
											ENSDARG00000100792	ENSDART00000165111
											ENSDARG00000100792	ENSDART00000163939
											ENSDARG00000079679	ENSDART00000113030
											ENSDARG00000079679	ENSDART00000168198
											ENSDARG00000079679	ENSDART00000161499
											ENSDARG00000079679	ENSDART00000160876
											ENSDARG00000079679	ENSDART00000157764
											ENSDARG00000039234	ENSDART00000057320
											ENSDARG00000044847	ENSDART00000157331
											ENSDARG00000044847	ENSDART00000106537
											ENSDARG00000044847	ENSDART00000164715
											ENSDARG00000044847	ENSDART00000065917
											ENSDARG00000105059	ENSDART00000171948
											ENSDARG00000076949	ENSDART00000112276
											ENSDARG00000078481	ENSDART00000152998
											ENSDARG00000088686	ENSDART00000172847
											ENSDARG00000088686	ENSDART00000110632
											ENSDARG00000100906	ENSDART00000123660
											ENSDARG00000086552	ENSDART00000172787
											ENSDARG00000086552	ENSDART00000127042
											ENSDARG00000098595	ENSDART00000173212
											ENSDARG00000098595	ENSDART00000158070
											ENSDARG00000105444	ENSDART00000147978
											ENSDARG00000029445	ENSDART00000143781
											ENSDARG00000029445	ENSDART00000048968
											ENSDARG00000088366	ENSDART00000105604
											ENSDARG00000088366	ENSDART00000133164
											ENSDARG00000088366	ENSDART00000165604
											ENSDARG00000031307	ENSDART00000114537
											ENSDARG00000031307	ENSDART00000045813
											ENSDARG00000095732	ENSDART00000142700
											ENSDARG00000095732	ENSDART00000138105
											ENSDARG00000103648	ENSDART00000167149
											ENSDARG00000103648	ENSDART00000164284
											ENSDARG00000103648	ENSDART00000160089
											ENSDARG00000103648	ENSDART00000170390
											ENSDARG00000063190	ENSDART00000092113

## Sheet: CNE_overlap_tiles
	Chromosome		Start	End				BIOMART
chr	1	chr1	50245501	50245800		GREAT LIST		Ensembl Gene ID Ensembl Transcript ID
chr	2	chr2	19144201	19144500		a1cf		ENSDARG00000002968 ENSDART00000152292
chr	2	chr2	19167901	19168200		adarb2		ENSDARG00000071823 ENSDART00000139596
chr	3	chr3	27972601	27972900		aktip		ENSDARG00000071823 ENSDART00000158354
chr	3	chr3	42591901	42592200		ascl1a		ENSDARG00000026862 ENSDART00000146202
chr	4	chr4	8871301	8871600		asic1b		ENSDARG00000026862 ENSDART00000029565
chr	4	chr4	17212201	17212500		atp11c		ENSDARG00000026862 ENSDART00000136545
chr	4	chr4	17499901	17500200		atp8a2		ENSDARG00000026862 ENSDART00000138893
chr	5	chr5	71444101	71444400		auts2		ENSDARG00000026862 ENSDART00000138409
chr	5	chr5	71444401	71444700		barhl2		ENSDARG00000038386 ENSDART00000056005
chr	6	chr6	4254001	4254300		bcas3		ENSDARG00000101866 ENSDART00000171359
chr	6	chr6	4261801	4262100		bcl11aa		ENSDARG00000101866 ENSDART00000165549
chr	6	chr6	11675101	11675400		cacnb4b		ENSDARG00000036442 ENSDART00000167282
chr	6	chr6	12185101	12185400		calml4b		ENSDARG00000036442 ENSDART00000052938
chr	6	chr6	14650501	14650800		casz1		ENSDARG00000036442 ENSDART00000165463
chr	6	chr6	24932701	24933000		ccne1		ENSDARG00000036442 ENSDART00000165865
chr	6	chr6	25750501	25750800		celf3b		ENSDARG00000077492 ENSDART00000109848
chr	6	chr6	56894701	56895000		cldn15a		ENSDARG00000077492 ENSDART00000152093
chr	7	chr7	20682601	20682900		cux2b		ENSDARG00000077492 ENSDART00000153695
chr	7	chr7	35392801	35393100		cx39.4		ENSDARG00000104361 ENSDART00000165609
chr	7	chr7	35901301	35901600		ddx27		ENSDARG00000104361 ENSDART00000163726
chr	7	chr7	46074301	46074600		dhrs13a.3		ENSDARG00000090764 ENSDART00000149957
chr	7	chr7	46170901	46171200		diaph2		ENSDARG00000090764 ENSDART00000079294
chr	7	chr7	46819801	46820100		dlgap3		ENSDARG00000090764 ENSDART00000077172
chr	8	chr8	4125301	4125600		dync1i2a		ENSDARG00000061352 ENSDART00000087426
chr	8	chr8	4246501	4246800		ebf3		ENSDARG00000061352 ENSDART00000132521
chr	8	chr8	10754101	10754400		efnb3b		ENSDARG00000062174 ENSDART00000089577
chr	8	chr8	11920201	11920500		emx2		ENSDARG00000062174 ENSDART00000149177
chr	8	chr8	33675301	33675600		epc1		ENSDARG00000062174 ENSDART00000122023
chr	8	chr8	34099201	34099500		esrrb		ENSDARG00000062174 ENSDART00000089564
chr	9	chr9	3281401	3281700		esrrga		ENSDARG00000062174 ENSDART00000171643
chr	10	chr10	27409801	27410100		etnk1		ENSDARG00000062174 ENSDART00000162696
chr	10	chr10	27518401	27518700		fam204a		ENSDARG00000062174 ENSDART00000159646
chr	10	chr10	43761001	43761300		fancl		ENSDARG00000059347 ENSDART00000157163
chr	11	chr11	21510901	21511200		fbxl14b		ENSDARG00000059347 ENSDART00000156532
chr	11	chr11	21576601	21576900		foxp4		ENSDARG00000059347 ENSDART00000156062
chr	12	chr12	6144301	6144600		frem1b		ENSDARG00000059347 ENSDART00000082447
chr	12	chr12	27088501	27088800		galcb		ENSDARG00000037030 ENSDART00000148257
chr	12	chr12	42321901	42322200		gapvd1		ENSDARG00000037030 ENSDART00000002812
chr	13	chr13	19407901	19408200		glula		ENSDARG00000098622 ENSDART00000163991
chr	13	chr13	25894501	25894800		gpd2		ENSDARG00000098622 ENSDART00000170294
chr	13	chr13	26180101	26180400		greb1		ENSDARG00000098622 ENSDART00000169822
chr	14	chr14	4966201	4966500		gsc		ENSDARG00000006983 ENSDART00000148426
chr	14	chr14	26923501	26923800		gsg1l		ENSDARG00000006983 ENSDART00000024206
chr	14	chr14	32274301	32274600		hat1		ENSDARG00000036463 ENSDART00000052977
chr	14	chr14	35794801	35795100		hel_dr4		ENSDARG00000086345 ENSDART00000135006
chr	14	chr14	39114901	39115200		hic1		ENSDARG00000086345 ENSDART00000134378
chr	14	chr14	39521701	39522000		hoxb1b		ENSDARG00000086345 ENSDART00000142846
chr	14	chr14	51316501	51316800		ints2		ENSDARG00000070357 ENSDART00000103155
chr	15	chr15	25731001	25731300		irx1a		ENSDARG00000091831 ENSDART00000128065
chr	15	chr15	27033601	27033900		irx2a		ENSDARG00000041137 ENSDART00000060304
chr	15	chr15	28043701	28044000		irx5a		ENSDARG00000041137 ENSDART00000152620
chr	15	chr15	30764701	30765000		irx6a		ENSDARG00000076060 ENSDART00000147443
chr	15	chr15	30771901	30772200		isl2a		ENSDARG00000076060 ENSDART00000103298
chr	16	chr16	665101	665400		itga11b		ENSDARG00000055459 ENSDART00000103151
chr	16	chr16	665401	665700		klf13		ENSDARG00000055459 ENSDART00000164035
chr	16	chr16	672001	672300		lbx2		ENSDARG00000078386 ENSDART00000160567
chr	16	chr16	775801	776100		lhx1a		ENSDARG00000078386 ENSDART00000161216
chr	16	chr16	40378501	40378800		lmo4b		ENSDARG00000078386 ENSDART00000164878
chr	16	chr16	43983601	43983900		lmx1bb		ENSDARG00000078386 ENSDART00000007756
chr	16	chr16	44074801	44075100		lrmp		ENSDARG00000042277 ENSDART00000062003
chr	17	chr17	19316101	19316400		mapk13		ENSDARG00000039701 ENSDART00000058036
chr	17	chr17	29822101	29822400		mcf2a		ENSDARG00000004861 ENSDART00000009104
chr	17	chr17	30052501	30052800		med27		ENSDARG00000004861 ENSDART00000126966
chr	17	chr17	38382601	38382900		mef2ca		ENSDARG00000019420 ENSDART00000017726
chr	17	chr17	52362301	52362600		megf8		ENSDARG00000019420 ENSDART00000143208
chr	17	chr17	52623901	52624200		meis2a		ENSDARG00000039699 ENSDART00000137057
chr	18	chr18	17795701	17796000		micall2a		ENSDARG00000039699 ENSDART00000058032
chr	19	chr19	37632901	37633200		mrps23		ENSDARG00000039699 ENSDART00000168771
chr	22	chr22	7347601	7347900		msi2b		ENSDARG00000007885 ENSDART00000020946
chr	22	chr22	16839901	16840200		myl2b		ENSDARG00000007885 ENSDART00000142483
chr	22	chr22	17025001	17025300		myt1b		ENSDARG00000007885 ENSDART00000131283
chr	22	chr22	23111401	23111700		nek7		ENSDARG00000045801 ENSDART00000067322
chr	23	chr23	7968301	7968600		nfia		ENSDARG00000076120 ENSDART00000161485
chr	23	chr23	29176801	29177100		nkx2.1b		ENSDARG00000076120 ENSDART00000114288
chr	24	chr24	3853501	3853800		oprl1		ENSDARG00000062402 ENSDART00000135604
chr	24	chr24	21204601	21204900		otx1a		ENSDARG00000062402 ENSDART00000090217
chr	25	chr25	1331401	1331700		oxr1a		ENSDARG00000062402 ENSDART00000170076
chr	25	chr25	32244001	32244300		pax8		ENSDARG00000016474 ENSDART00000028044
chr	25	chr25	32903401	32903700		pbx1a		ENSDARG00000090183 ENSDART00000113230
chr	25	chr25	33969301	33969600		pcdh19		ENSDARG00000090183 ENSDART00000161282
						pfkpa		ENSDARG00000090183 ENSDART00000112854
						pitx2		ENSDARG00000099776 ENSDART00000170216
						pou3f3b		ENSDARG00000099776 ENSDART00000163822
						pou4f1		ENSDARG00000099776 ENSDART00000172148
						prkg1b		ENSDARG00000062430 ENSDART00000144028
						prox2		ENSDARG00000062430 ENSDART00000140453
						psme3		ENSDARG00000062430 ENSDART00000090266
						ptprc		ENSDARG00000070794 ENSDART00000139091
						rapgef1a		ENSDARG00000070794 ENSDART00000076611
						rasa1b		ENSDARG00000070794 ENSDART00000131670
						rbfox1		ENSDARG00000070794 ENSDART00000104249
						recql		ENSDARG00000059073 ENSDART00000138315
						rps27.2		ENSDARG00000059073 ENSDART00000082085
						rspo3		ENSDARG00000037390 ENSDART00000054408
						samm50l		ENSDARG00000034916 ENSDART00000044128
						scaper		ENSDARG00000055493 ENSDART00000077853
						si:ch211-216l23.1		ENSDARG00000055493 ENSDART00000148190
						si:dkey-238n5.3		ENSDARG00000054033 ENSDART00000136415
						si:dkey-242e21.3		ENSDARG00000069085 ENSDART00000143487
						si:dkey-57c15.1		ENSDARG00000069085 ENSDART00000023545
						spice1		ENSDARG00000101831 ENSDART00000162474
						spred1		ENSDARG00000101831 ENSDART00000161774
						sptb		ENSDARG00000101831 ENSDART00000166103
						tardbpl		ENSDARG00000101831 ENSDART00000170665
						tbx2b		ENSDARG00000001785 ENSDART00000016303
						tbx5a		ENSDARG00000001785 ENSDART00000148452
						tfap2c		ENSDARG00000001785 ENSDART00000148602
						tjp2b		ENSDARG00000034043 ENSDART00000043857
						tm2d1		ENSDARG00000034420 ENSDART00000045628
						tpm1		ENSDARG00000003971 ENSDART00000012862
						tsc22d3		ENSDARG00000007950 ENSDART00000153537
						tsr1		ENSDARG00000007950 ENSDART00000154865
						ush2a		ENSDARG00000007950 ENSDART00000022861
						zfand2a		ENSDARG00000061368 ENSDART00000087450
						zfpm2a		ENSDARG00000025131 ENSDART00000031508
						zgc:101564		ENSDARG00000014018 ENSDART00000005641
						zgc:109736		ENSDARG00000014018 ENSDART00000134373
						zgc:110204		ENSDARG00000054749 ENSDART00000076997
						zgc:154085		ENSDARG00000054749 ENSDART00000148748
						zgc:154142		ENSDARG00000068365 ENSDART00000076420
						zgc:162298		ENSDARG00000068365 ENSDART00000147131
						zgc:165617		ENSDARG00000068365 ENSDART00000127460
						zgc:77938		ENSDARG00000045574 ENSDART00000135730
						znf536		ENSDARG00000045574 ENSDART00000131973
								ENSDARG00000045574 ENSDART00000145513
								ENSDARG00000045574 ENSDART00000147853
								ENSDARG00000058470 ENSDART00000081341
								ENSDARG00000058470 ENSDART00000151388
								ENSDARG00000022895 ENSDART00000034883
								ENSDARG00000022895 ENSDART00000148830
								ENSDARG00000009681 ENSDART00000005140
								ENSDARG00000009681 ENSDART00000138111
								ENSDARG00000029764 ENSDART00000131731
								ENSDARG00000029764 ENSDART00000097433
								ENSDARG00000029764 ENSDART00000131309
								ENSDARG00000029764 ENSDART00000134219
								ENSDARG00000029764 ENSDART00000134953
								ENSDARG00000029764 ENSDART00000138962
								ENSDARG00000029764 ENSDART00000027392
								ENSDARG00000029764 ENSDART00000039551
								ENSDARG00000029764 ENSDART00000160786
								ENSDARG00000029764 ENSDART00000099134
								ENSDARG00000079751 ENSDART00000142056
								ENSDARG00000103934 ENSDART00000170671
								ENSDARG00000098240 ENSDART00000158273
								ENSDARG00000098240 ENSDART00000160507
								ENSDARG00000098240 ENSDART00000171700
								ENSDARG00000098240 ENSDART00000161414
								ENSDARG00000077840 ENSDART00000144970
								ENSDARG00000077840 ENSDART00000143510
								ENSDARG00000077840 ENSDART00000033976
								ENSDARG00000102366 ENSDART00000162096
								ENSDARG00000102366 ENSDART00000165708
								ENSDARG00000102366 ENSDART00000159413
								ENSDARG00000033973 ENSDART00000135632
								ENSDARG00000033973 ENSDART00000044452
								ENSDARG00000032614 ENSDART00000100194
								ENSDARG00000032614 ENSDART00000155212
								ENSDARG00000032614 ENSDART00000156584
								ENSDARG00000032614 ENSDART00000156160
								ENSDARG00000032614 ENSDART00000154714
								ENSDARG00000032614 ENSDART00000156914
								ENSDARG00000032614 ENSDART00000050649
								ENSDARG00000032614 ENSDART00000145918
								ENSDARG00000032614 ENSDART00000152414
								ENSDARG00000032614 ENSDART00000154311
								ENSDARG00000032614 ENSDART00000152330
								ENSDARG00000032614 ENSDART00000152790
								ENSDARG00000032614 ENSDART00000136901
								ENSDARG00000032614 ENSDART00000142827
								ENSDARG00000032614 ENSDART00000142982
								ENSDARG00000053424 ENSDART00000137528
								ENSDARG00000053424 ENSDART00000101080
								ENSDARG00000102879 ENSDART00000157612
								ENSDARG00000102879 ENSDART00000164117
								ENSDARG00000102879 ENSDART00000165427
								ENSDARG00000056966 ENSDART00000079536
								ENSDARG00000056966 ENSDART00000165554
								ENSDARG00000062420 ENSDART00000138233
								ENSDARG00000062420 ENSDART00000138382
								ENSDARG00000062420 ENSDART00000090237
								ENSDARG00000062420 ENSDART00000090242
								ENSDARG00000071209 ENSDART00000105135
								ENSDARG00000071209 ENSDART00000158531
								ENSDARG00000030703 ENSDART00000006538
								ENSDARG00000030703 ENSDART00000150420
								ENSDARG00000101325 ENSDART00000159249
								ENSDARG00000015879 ENSDART00000029014
								ENSDARG00000100494 ENSDART00000165698
								ENSDARG00000100494 ENSDART00000165782
								ENSDARG00000100494 ENSDART00000165330
								ENSDARG00000034344 ENSDART00000149443
								ENSDARG00000034344 ENSDART00000173398
								ENSDARG00000028000 ENSDART00000033394
								ENSDARG00000028000 ENSDART00000131753
								ENSDARG00000028000 ENSDART00000167043
								ENSDARG00000036194 ENSDART00000148319
								ENSDARG00000036194 ENSDART00000173243
								ENSDARG00000036194 ENSDART00000052569
								ENSDARG00000036194 ENSDART00000137652
								ENSDARG00000095896 ENSDART00000149949
								ENSDARG00000095896 ENSDART00000149202
								ENSDARG00000005559 ENSDART00000025031
								ENSDARG00000031702 ENSDART00000152765
								ENSDARG00000031702 ENSDART00000152616
								ENSDARG00000031702 ENSDART00000043236
								ENSDARG00000041952 ENSDART00000114931
								ENSDARG00000041952 ENSDART00000165167
								ENSDARG00000012234 ENSDART00000002835
								ENSDARG00000012234 ENSDART00000153101
								ENSDARG00000012234 ENSDART00000162528
								ENSDARG00000071437 ENSDART00000137111
								ENSDARG00000071437 ENSDART00000105607
								ENSDARG00000071437 ENSDART00000137873
								ENSDARG00000043593 ENSDART00000139947
								ENSDARG00000043593 ENSDART00000064017
								ENSDARG00000073665 ENSDART00000132486
								ENSDARG00000073665 ENSDART00000141685
								ENSDARG00000014746 ENSDART00000122037
								ENSDARG00000014746 ENSDART00000150888
								ENSDARG00000014746 ENSDART00000151143
								ENSDARG00000014746 ENSDART00000055534
								ENSDARG00000014746 ENSDART00000151546
								ENSDARG00000014746 ENSDART00000151178
								ENSDARG00000014746 ENSDART00000165936
								ENSDARG00000007175 ENSDART00000021610
								ENSDARG00000007175 ENSDART00000172169
								ENSDARG00000007175 ENSDART00000162204
								ENSDARG00000007175 ENSDART00000101198
								ENSDARG00000055475 ENSDART00000077834
								ENSDARG00000055475 ENSDART00000139964
								ENSDARG00000055475 ENSDART00000134604
								ENSDARG00000100513 ENSDART00000167033
								ENSDARG00000070081 ENSDART00000058578
								ENSDARG00000070081 ENSDART00000132140
								ENSDARG00000039681 ENSDART00000058007
								ENSDARG00000023104 ENSDART00000156145
								ENSDARG00000023104 ENSDART00000156190
								ENSDARG00000023104 ENSDART00000153530
								ENSDARG00000023104 ENSDART00000103324
								ENSDARG00000059707 ENSDART00000146133
								ENSDARG00000059707 ENSDART00000083296
								ENSDARG00000101252 ENSDART00000171049
								ENSDARG00000075723 ENSDART00000134498
								ENSDARG00000105115 ENSDART00000161215
								ENSDARG00000004647 ENSDART00000012653
								ENSDARG00000041449 ENSDART00000060764
								ENSDARG00000030490 ENSDART00000145147
								ENSDARG00000030490 ENSDART00000040627
								ENSDARG00000004452 ENSDART00000139223
								ENSDARG00000004452 ENSDART00000141928
								ENSDARG00000004452 ENSDART00000126681
								ENSDARG00000004452 ENSDART00000027255
								ENSDARG00000006120 ENSDART00000122101
								ENSDARG00000006120 ENSDART00000005491
								ENSDARG00000024894 ENSDART00000037691
								ENSDARG00000024894 ENSDART00000114947
								ENSDARG00000024894 ENSDART00000037681
								ENSDARG00000024894 ENSDART00000162171
								ENSDARG00000040606 ENSDART00000149665
								ENSDARG00000040606 ENSDART00000150219
								ENSDARG00000023443 ENSDART00000092355
								ENSDARG00000023443 ENSDART00000136184
								ENSDARG00000023443 ENSDART00000137559
								ENSDARG00000023443 ENSDART00000115057
								ENSDARG00000023443 ENSDART00000018739
								ENSDARG00000023443 ENSDART00000170624
								ENSDARG00000023443 ENSDART00000162845
								ENSDARG00000057042 ENSDART00000079638
								ENSDARG00000057042 ENSDART00000157705
								ENSDARG00000057042 ENSDART00000113099
								ENSDARG00000075666 ENSDART00000054115
								ENSDARG00000007744 ENSDART00000135409
								ENSDARG00000007744 ENSDART00000052645
								ENSDARG00000007744 ENSDART00000149256
								ENSDARG00000007744 ENSDART00000162240
								ENSDARG00000029482 ENSDART00000086201
								ENSDARG00000029482 ENSDART00000166537
								ENSDARG00000029482 ENSDART00000171767
								ENSDARG00000103511 ENSDART00000159455
								ENSDARG00000103511 ENSDART00000170444
								ENSDARG00000103511 ENSDART00000172425
								ENSDARG00000040123 ENSDART00000141941
								ENSDARG00000040123 ENSDART00000151936
								ENSDARG00000040123 ENSDART00000104583
								ENSDARG00000040123 ENSDART00000058685
								ENSDARG00000070621 ENSDART00000091182
								ENSDARG00000070621 ENSDART00000162251
								ENSDARG00000070621 ENSDART00000103883
								ENSDARG00000070621 ENSDART00000136265
								ENSDARG00000013389 ENSDART00000014454
								ENSDARG00000100792 ENSDART00000165111
								ENSDARG00000100792 ENSDART00000163939
								ENSDARG00000088366 ENSDART00000105604
								ENSDARG00000088366 ENSDART00000133164
								ENSDARG00000088366 ENSDART00000165604
								ENSDARG00000103648 ENSDART00000167149
								ENSDARG00000103648 ENSDART00000164284
								ENSDARG00000103648 ENSDART00000160089
								ENSDARG00000103648 ENSDART00000170390

## Sheet: IPA_pathways
Canonical Pathway	All	Hyper	Hypo	CNE	-LOG(Pvalues)
Factors Promoting Cardiogenesis in Vertebrates	5.87972	3.38239	3.29095	2.17044
Axonal Guidance Signaling	4.97919	2.2881	3.41858	0.264649
TGF-β Signaling	3.20213	2.03781	1.976	3.31485
Cardiomyocyte Differentiation via BMP Receptors	3.77678	1.46461	3.6779	1.09529
Human Embryonic Stem Cell Pluripotency	4.71656	3.08043	1.77535	0
Regulation of eIF4 and p70S6K Signaling	2.63352	0.774987	3.39058	1.63302
BMP signaling pathway	2.32067	0.995097	2.21869	2.40166
Thyroid Cancer Signaling	3.14506	3.54481	0.908149	0
Adipogenesis pathway	2.93167	1.8436	1.77535	0.96671
Bladder Cancer Signaling	3.20213	2.03781	1.976	0
Wnt/β-catenin Signaling	3.09683	0.982761	2.93512	0
Molecular Mechanisms of Cancer	2.56006	0.768756	2.38697	1.17665
STAT3 Pathway	2.41796	2.357	1.00012	0.579132
Androgen Signaling	3.02061	1.61972	1.56219	0
Role of NANOG in Mammalian Embryonic Stem Cell Pluripotency	3.02061	1.61972	1.56219	0
Mouse Embryonic Stem Cell Pluripotency	2.34073	1.88327	1.24335	0.483391
EIF2 Signaling	1.89263	0.544416	2.68043	0.746535
PCP pathway	2.12654	1.86084	1.14813	0.634537
Glycerol-3-phosphate Shuttle	1.09707	1.36243	1.34732	1.90405
Cell Cycle: G1/S Checkpoint Regulation	2.0937	1.16805	1.78687	0.628558
Ephrin B Signaling	2.41796	1.6481	1.00012	0.579132
Parkinson's Signaling	2.05647	0.676089	1.61893	1.18865
Regulation of the Epithelial-Mesenchymal Transition Pathway	2.30902	2.22485	0.512522	0.268859
Estrogen-mediated S-phase Entry	1.56853	1.31903	1.29161	1.01965
Basal Cell Carcinoma Signaling	2.4516	1.0485	1.6182	0
Leukocyte Extravasation Signaling	2.06338	1.13994	1.08304	0.698209
Cardiac Hypertrophy Signaling	1.68981	0.95299	1.67355	0.622225
Role of Wnt/GSK-3β Signaling in the Pathogenesis of Influenza	2.32067	1.59135	0.960891	0
AMPK Signaling	1.2445	0	2.7788	0.768728
Cell Cycle Regulation by BTG Family Proteins	1.82663	1.03056	1.00472	0.865479
Epithelial Adherens Junction Signaling	1.71335	1.67841	0.416224	0.905511
Tight Junction Signaling	1.76981	1.43108	0.602268	0.812006
Glycerol Degradation I	0.813737	1.0709	1.05613	1.60571
Gαi Signaling	1.75616	2.06387	0.261843	0.402789
Chemokine Signaling	1.34552	1.06247	0.531804	1.44917
Glioblastoma Multiforme Signaling	1.71335	1.19067	1.1392	0.338915
Glycolysis I	1.52171	1.28695	0.496924	1.0028
Ovarian Cancer Signaling	1.99569	1.3546	0.855188	0
Transcriptional Regulatory Network in Embryonic Stem Cells	1.631	2.56109	0	0
G Beta Gamma Signaling	1.97876	1.39026	0.822974	0
ATM Signaling	1.64644	0.668024	1.21619	0.659578
Gα12/13 Signaling	1.37532	2.11556	0.272831	0.411302
Small Cell Lung Cancer Signaling	1.34552	1.06247	1.02749	0.589486
VEGF Signaling	1.87907	0.814561	1.28501	0
Polyamine Regulation in Colon Cancer	0.917657	0.55611	1.36034	1.05567
Phosphatidylethanolamine Biosynthesis II	0.65509	0.904235	0.889805	1.4323
Mitotic Roles of Polo-Like Kinase	1.46152	0.597298	1.74231	0
CXCR4 Signaling	1.61296	1.13186	0.69572	0.326283
Glutamate Receptor Signaling	1.70491	0.690347	1.25247	0
G-Protein Coupled Receptor Signaling	1.29765	2.32447	0	0
CREB Signaling in Neurons	1.70556	0.966748	0.919429	0
Colorectal Cancer Metastasis Signaling	1.5232	1.22072	0.818507	0
Sertoli Cell-Sertoli Cell Junction Signaling	0.931813	0.912973	0.292184	1.41409
Actin Cytoskeleton Signaling	1.12764	1.38916	0.379578	0.642305
Hereditary Breast Cancer Signaling	1.18925	0.531093	1.32412	0.378798
Thiamin Salvage III	1.56226	1.83318	0	0
Adenine and Adenosine Salvage VI	1.56226	0	1.81784	0
Tec Kinase Signaling	1.53412	1.08544	0.662902	0
Agrin Interactions at Neuromuscular Junction	1.39047	1.72854	0	0
RhoGDI Signaling	1.30791	0.95103	0.568805	0.286916
Synaptic Long Term Depression	1.37701	1.73132	0	0
Superpathway of Citrulline Metabolism	1.26074	0	1.73041	0
Endothelin-1 Signaling	0.994293	1.37878	0.312054	0.288638
phagosome maturation	1.32598	0.587452	0.955561	0
cAMP-mediated signaling	0.827358	1.79752	0	0.22049
Glycine Degradation (Creatine Biosynthesis)	1.26721	1.53534	0	0
Alanine Biosynthesis II	1.26721	1.53534	0	0
Alanine Degradation III	1.26721	1.53534	0	0
Gαq Signaling	1.30388	0.767675	0.730367	0
Glutamine Degradation I	1.26721	0	1.52011	0
Cellular Effects of Sildenafil (Viagra)	0.842829	1.3785	0	0.378798
Prolactin Signaling	0.853743	1.6481	0	0
Inosine-5'-phosphate Biosynthesis II	1.09707	1.36243	0	0
Hypusine Biosynthesis	1.09707	0	1.34732	0
Coenzyme A Biosynthesis	1.09707	0	1.34732	0
Gap Junction Signaling	0.871871	1.56652	0	0
Thrombopoietin Signaling	0.719032	1.32787	0.244068	0
Semaphorin Signaling in Neurons	0.75166	0	1.33009	0

## Sheet: IPA_upstream_regulators
Upstream regulators	All	Hyper	Hypo	CNE	-LOG(Pvalues)
KLF4	9.84466	5.55593	5.38147	3.5996
MYC	9.16236	3.93934	6.10625	2.2579
BMP2	8.46499	5.66657	4.77098	2.18886
POU4F1	4.67819	3.91593	3.05336	7.98667
SOX2	7.59178	4.64538	3.34689	3.70226
SHH	7.81875	5.38292	3.7892	1.53492
tretinoin	6.9969	6.72736	2.31312	1.34435
SOX3	6.27056	3.19417	3.97015	3.63006
POU5F1	6.49016	5.30388	2.85704	2.16508
HNRNPA2B1	7.72623	4.63678	3.76272	N/A
CTNNB1	6.26778	4.78939	2.51348	2.35108
TGFB1	7.24999	4.43959	4.08959	N/A
CREB1	6.17466	3.4861	4.71817	N/A
BMP4	5.79914	4.82798	1.93384	1.81527
JAG1	6.52356	4.49047	3.23804	N/A
NRG1	5.46277	3.67272	2.95338	1.97903
ERBB2	6.445	2.57064	4.9286	N/A
INHBA	5.46655	4.44601	2.40418	1.4851
topotecan	5.40169	4.40229	2.37552	1.47306
beta-estradiol	6.21863	5.32189	2.10329	N/A
MED1	4.71023	4.53265	1.78032	2.61113
PITX2	5.47101	3.22407	3.14527	1.44972
PTF1A	4.69573	3.77664	1.98724	2.77389
RBPJ	5.75838	2.60807	3.90504	N/A
GATA6	5.03178	3.20422	2.49283	1.52221
camptothecin	4.25882	2.88274	3.52798	1.55626
trastuzumab	4.62222	3.01348	4.3522	N/A
HNF4A	5.60408	2.09339	4.0808	N/A
GLI1	5.51791	2.24861	3.9399	N/A
NRXN1	2.94884	2.04909	3.01243	3.59968
MET	4.94685	3.76392	2.86714	N/A
TP53	5.048	3.5462	2.68656	N/A
TBX20	4.20935	N/A	2.94453	4.05916
POU4F2	2.60582	1.84403	1.80394	4.86529
WT1	5.18289	2.37814	3.38033	N/A
APP	4.18784	2.21313	3.01488	1.33054
miR-141-3p (and other miRNAs w/seed AACACUG)	3.36415	3.07003	1.3856	2.90399
SMARCB1	4.69443	2.72734	3.26152	N/A
APLNR	2.92804	2.21567	2.1864	3.28645
TCF3	4.45613	4.41398	1.495	N/A
FN1	4.23669	3.99618	2.11094	N/A
TGFBR2	4.12119	2.42334	2.33332	1.45529
EGF	4.7905	3.02588	2.45852	N/A
ZFHX3	4.99575	2.97042	2.15347	N/A
arsenite	4.17397	3.26245	2.45384	N/A
FGF2	4.16688	3.58475	2.03007	N/A
EDN1	4.47453	1.79044	3.38983	N/A
POLR2A	3.4139	2.22449	2.17198	1.73574
Hdac	3.40714	N/A	4.32975	1.70239
FADD	2.87735	2.99698	2.17463	1.37184
progesterone	4.38386	2.9561	2.05779	N/A
HRAS	3.5708	3.56721	2.20096	N/A
RPL23A	2.73159	3.27165	1.38557	1.93965
RGS19	3.09597	2.32096	3.84832	N/A
forskolin	4.22752	5.00339	N/A	N/A
WNT3A	4.04584	2.89388	2.2571	N/A
RB1	3.697	3.25792	2.20758	N/A
DGCR8	3.92075	3.477	1.60885	N/A
SMAD2	3.67027	3.92581	N/A	1.40005
FOXP1	3.81961	3.01694	1.97114	N/A
vatalanib	3.94831	3.43669	N/A	1.38197
NKX2-5	2.60582	2.78359	N/A	3.37626
HDAC5	3.4139	3.10669	2.17198	N/A
GATA4	3.12961	2.22112	1.6066	1.62198
YAP1	3.4426	2.59949	2.53459	N/A
FOS	4.08083	4.43582	N/A	N/A
miR-185-3p (and other miRNAs w/seed GGGGCUG)	3.2014	3.74489	1.55865	N/A
3-iodobenzylguanidine	3.2014	3.74489	1.55865	N/A
ASCL1	2.68702	2.11356	1.41698	2.2815
RPRD1B	3.2014	1.57364	3.71465	N/A
ZK 230211	3.2014	1.57364	3.71465	N/A
STAMBP	3.2014	1.57364	3.71465	N/A
CTNNβ-LEF1	3.2014	1.57364	3.71465	N/A
GPC3	3.2014	1.57364	3.71465	N/A
methyl-beta-cyclodextrin	3.55259	3.56124	1.36114	N/A
deferoxamine	3.60197	4.84399	N/A	N/A
L-threonine	2.78128	2.12261	2.09348	1.42254
PLN	4.13186	2.16858	2.11638	N/A
HTT	3.35808	5.00017	N/A	N/A
SOX1	3.3176	N/A	2.45545	2.55071
COMMD1	3.55259	2.40408	2.36189	N/A
Pln	4.07572	2.14151	2.08947	N/A
Vegf	3.48551	3.40727	1.36041	N/A
Lh	3.73981	4.48899	N/A	N/A
STAT5A	2.3139	2.83274	1.375	1.64401
CDKN2A	3.61582	4.52701	N/A	N/A
SMARCD3	3.95452	2.63617	1.50757	N/A
EHMT2	2.50607	1.78391	1.74412	1.98423
GMNN	3.16092	N/A	2.35588	2.48505
GDF2	3.51302	2.97042	1.49383	N/A
MIRLET7	1.79784	2.32096	2.29155	1.51781
FOXC1	3.84545	1.4957	2.53088	N/A
KDM4C	2.16095	2.92763	N/A	2.77118
DKK1	3.36415	3.07003	1.3856	N/A
TSH	2.5638	1.40348	2.11638	1.70601
ERG	2.86853	1.77941	1.7057	1.40396
AIF1	3.52677	2.5843	N/A	1.6411
MYOD1	2.59134	3.67421	N/A	1.46117
PUF60	2.22327	2.75652	2.7267	N/A
LEF1	3.36415	2.19623	2.14388	N/A
SMARCA4	3.11191	1.30355	3.28738	N/A
MTA1	2.36755	1.70006	1.66071	1.92387
CDK8	3.14233	2.84763	1.64095	N/A
LMNA	3.30458	4.31741	N/A	N/A
PGR	3.34569	1.9336	2.30183	N/A
LIN28B	3.25017	4.29071	N/A	N/A
STAU1	2.42848	3.20647	1.86654	N/A
STAT5B	2.51051	3.38934	N/A	1.58754
cetuximab	2.42848	1.89526	3.1626	N/A
CLCN5	2.65112	3.43669	N/A	1.38197
TBX1	2.65112	3.43669	N/A	1.38197
selenomethylselenocysteine	3.74249	3.7142	N/A	N/A
dexamethasone	3.37759	4.05064	N/A	N/A
NCOA5	2.73159	3.27165	1.38557	N/A
TSHZ3	2.73159	3.27165	1.38557	N/A
PURB	2.73159	3.27165	1.38557	N/A
SIRT1	3.18378	2.39039	1.80761	N/A
HIF1A	2.48532	2.28836	2.60294	N/A
ATAD2	2.73159	1.40046	3.24155	N/A
AHNAK	2.73159	1.40046	3.24155	N/A
(E)-9-(2-nitrovinyl)anthracene	2.73159	1.40046	3.24155	N/A
(E)-1-(2-nitrovinyl)naphthalene	2.73159	1.40046	3.24155	N/A
SP1	3.32423	2.60133	1.42999	N/A
FOXA1	3.29462	2.04816	1.97868	N/A
SIX5	3.55259	2.40408	1.36114	N/A
CEBPA	3.02819	2.78445	1.48767	N/A
EOMES	2.92228	2.7418	N/A	1.58511
CXCL12	3.03437	2.40931	1.795	N/A
mir-1	3.37371	N/A	3.84006	N/A
NR4A3	3.13148	2.06359	2.01202	N/A
WNT9B	2.43784	N/A	2.94453	1.81554
Wnt	2.50607	2.69997	N/A	1.98423
CD40LG	2.79203	2.24398	2.12863	N/A
FSH	2.71241	3.10177	1.3502	N/A
sirolimus	3.15278	2.61634	1.37657	N/A
N-[N-(3,5-difluorophenacetyl-L-Ala)]-S-phenylglycine t-butyl ester	3.55259	3.56124	N/A	N/A
Histone h4	3.18528	1.98801	1.91919	N/A
mir-126	2.42187	2.30391	N/A	2.34932
IGF1	2.55961	4.49725	N/A	N/A
CTS-1027	3.2014	3.74489	N/A	N/A
2-nitrotoluene	3.2014	3.74489	N/A	N/A
NR3C1	2.85688	1.46702	2.62038	N/A
vandetanib	3.09597	N/A	2.29155	1.51781
MTOR	2.95551	2.01227	1.92091	N/A
PTTG1	2.88644	2.01197	1.97114	N/A
ID1	3.08789	3.77664	N/A	N/A
CCND1	2.10345	1.54555	1.46929	1.70589
SMARCE1	2.77641	2.57353	1.46804	N/A
norepinephrine	3.05864	2.17821	1.57214	N/A
PROX1	3.38092	3.42215	N/A	N/A
IFNG	3.47436	3.32539	N/A	N/A
TFDP1	2.8263	1.97613	1.93544	N/A
DDX17	2.65112	2.03931	2.01031	N/A
Integrin	2.65112	2.03931	2.01031	N/A
GNL2	2.22327	2.75652	N/A	1.71946
bucladesine	3.11971	3.57137	N/A	N/A
cyclosporin A	2.78225	2.19343	1.70539	N/A
SNAI2	3.17107	N/A	3.5016	N/A
fluocinolone acetonide	2.81924	2.34409	1.49044	N/A
BHLHE41	2.92804	3.72122	N/A	N/A
PAX6	2.62005	2.68046	N/A	1.33469
ISL1	1.65261	1.52537	N/A	3.44822
PKD1	3.35158	3.24013	N/A	N/A
thiocoraline	2.92804	N/A	2.1864	1.46748
CHADL	2.24655	2.16897	2.12754	N/A
GLI2	2.54094	2.01823	1.95761	N/A
CDKN1B	2.13652	N/A	2.31656	2.03329
E2F5	2.62352	1.42239	2.41543	N/A
T	3.14233	1.66913	1.64095	N/A
ERK1/2	2.72476	2.34057	1.3826	N/A
phenylephrine	2.41223	2.0142	1.96295	N/A
TET2	2.60586	3.78155	N/A	N/A
HIC1	3.08789	1.31105	1.98724	N/A
SLC9A3R1	3.36644	3.01348	N/A	N/A
CDH2	3.36644	3.01348	N/A	N/A
RNF20	2.01358	1.6218	2.72965	N/A
TGFB2	2.99957	3.36435	N/A	N/A
isoflurophate	3.2014	1.57364	1.55865	N/A
LIF	2.84852	3.45571	N/A	N/A
KMT2A	1.6971	2.23704	N/A	2.36422
Rock	2.24067	1.62284	2.42173	N/A
FUBP1	2.05444	2.5843	N/A	1.6411
Camk	2.05444	2.5843	N/A	1.6411
cisplatin	2.52691	1.30982	2.43997	N/A
KLF5	2.64491	2.22449	1.40561	N/A
PPIF	1.99977	2.03678	N/A	2.22962
NFATC4	3.08109	3.17731	N/A	N/A
IRX4	2.05444	N/A	2.55461	1.6411
PELP1	2.08698	N/A	2.29093	1.79895
Tgf beta	2.65554	3.50771	N/A	N/A
IRS1	2.40978	2.19276	1.53907	N/A
PRMT5	3.01367	3.12189	N/A	N/A
TFAP2C	2.41223	2.06359	N/A	1.64985
TGFBR1	2.69711	3.41383	N/A	N/A
RAC1	2.35316	1.89489	1.83541	N/A
PI3K (complex)	2.709	3.37383	N/A	N/A
thioacetamide	2.81441	3.26274	N/A	N/A
methylnitrosourea	2.94884	3.06848	N/A	N/A
kainic acid	3.5431	2.46969	N/A	N/A
CPE	2.42187	1.32499	2.26202	N/A
CST5	2.74061	N/A	3.26758	N/A
BHMT	2.73159	3.27165	N/A	N/A
Cacnb1	2.73159	3.27165	N/A	N/A
PTIO	2.73159	3.27165	N/A	N/A
CACNA2D1	2.73159	3.27165	N/A	N/A
TF	3.14233	2.84763	N/A	N/A
BTG2	3.14233	2.84763	N/A	N/A
BDNF	2.83465	3.13408	N/A	N/A
APBB1	2.33185	1.83215	1.80356	N/A
Cd2+	2.33185	1.83215	1.80356	N/A
WNT4	1.48996	N/A	2.17053	2.28587
PPARGC1B	2.12389	1.52876	2.29093	N/A
CUL1	1.91555	2.44204	N/A	1.57498
EPHB4	2.8656	1.55141	1.51295	N/A
STK11	2.61392	1.67148	1.6066	N/A
GLI3	3.28489	N/A	2.60535	N/A
NOC3L	1.60034	1.87175	N/A	2.41512
ANK2	1.60034	1.87175	N/A	2.41512
CIRBP	1.60034	1.87175	N/A	2.41512
MYT1L	1.60034	1.87175	N/A	2.41512
SPAST	1.60034	N/A	1.85666	2.41512
PTPRCAP	1.60034	N/A	1.85666	2.41512
LMO3	1.60034	N/A	1.85666	2.41512
RGCC	2.53431	3.31609	N/A	N/A
tetrathiomolybdate	2.53431	3.31609	N/A	N/A
androgen	2.59285	1.65973	1.59501	N/A
LHX2	2.42187	3.42215	N/A	N/A
MTORC1	2.41234	1.72722	1.68773	N/A
FMR1	2.28177	N/A	1.60885	1.88607
EGFR	2.72739	3.04632	N/A	N/A
DDX5	2.24304	1.77384	1.74538	N/A
bexarotene	2.78976	2.97069	N/A	N/A
miR-34a-5p (and other miRNAs w/seed GGCAGUG)	2.01594	2.28293	1.44703	N/A
SCX	2.77641	1.4957	1.46804	N/A
MIB1	3.29192	2.44204	N/A	N/A
FBXW7	2.36081	3.3571	N/A	N/A
CRTC2	1.7699	2.51417	1.43058	N/A
PAX1	2.24067	N/A	1.58394	1.86785
Ca2+	3.09643	2.59374	N/A	N/A
PAX3	2.82866	2.84188	N/A	N/A
SMPD1	2.42848	3.20647	N/A	N/A
GSX2	2.42848	1.89526	N/A	1.31106
MAPK14	2.37342	3.25828	N/A	N/A
NTRK2	2.60389	N/A	3.00263	N/A
2,3 butanedione monoxime	2.69788	1.45811	1.43058	N/A
CBX4	2.16095	1.71967	1.69135	N/A
DAXX	2.16095	1.71967	1.69135	N/A
THRB	3.27587	2.24861	N/A	N/A
Rbpjl2	2.73159	1.40046	1.38557	N/A
SGK223	2.73159	1.40046	1.38557	N/A
HEY1	2.85955	2.63617	N/A	N/A
SMAD3	2.4113	3.08236	N/A	N/A
PRKCA	1.77781	1.86162	1.80246	N/A
DRAP1	1.66721	2.40408	1.36114	N/A
L-triiodothyronine	1.84642	3.58475	N/A	N/A
HBP1	3.09597	2.32096	N/A	N/A
2-(3-hydroxypropoxy)calcitriol	2.43784	2.9745	N/A	N/A
GNG7	2.43784	2.9745	N/A	N/A
methyleugenol	2.43784	2.9745	N/A	N/A
GNG13	2.43784	2.9745	N/A	N/A
N(6)-(3-iodobenzyl)-5'-N-methylcarboxamidoadenosine	2.0847	1.66913	1.64095	N/A
CDC25B	2.43784	N/A	2.94453	N/A
DACT3	2.43784	N/A	2.94453	N/A
ATE1	2.43784	N/A	2.94453	N/A
TRIM65	2.43784	N/A	2.94453	N/A
SLC9A3R2	2.43784	N/A	2.94453	N/A
SNRK	2.43784	N/A	2.94453	N/A
alvocidib	1.79232	1.81352	1.77358	N/A
IL1B	2.78553	2.56179	N/A	N/A
SRPK3	1.60034	1.87175	1.85666	N/A
RPS20	1.60034	1.87175	1.85666	N/A
CDC45	1.60034	1.87175	1.85666	N/A
MAG	1.60034	1.87175	1.85666	N/A
Ahr-aryl hydrocarbon-RelA	1.60034	1.87175	1.85666	N/A
USP36	1.60034	1.87175	1.85666	N/A
Sin3b	1.60034	1.87175	1.85666	N/A
PRDM2	1.60034	1.87175	1.85666	N/A
GLIPR1	1.60034	1.87175	1.85666	N/A
HUNK	1.60034	1.87175	1.85666	N/A
3-methoxyapigenin	1.60034	1.87175	1.85666	N/A
TCF4-CTNNβ	1.60034	1.87175	1.85666	N/A
ZBTB14	1.60034	1.87175	1.85666	N/A
NSMCE3	1.60034	1.87175	1.85666	N/A
RBMS1	1.60034	1.87175	1.85666	N/A
RPL21	1.60034	1.87175	1.85666	N/A
PTRF	1.60034	1.87175	1.85666	N/A
SU6657	1.60034	1.87175	1.85666	N/A
Cofilin	1.60034	1.87175	1.85666	N/A
ATN1	2.68261	2.64433	N/A	N/A
HOXA9	1.50906	N/A	1.46358	2.34753
MAP3K3	2.55295	1.3884	1.36114	N/A
actinomycin D	2.1071	3.19025	N/A	N/A
SB 216763	2.55515	2.74116	N/A	N/A
phorbol myristate acetate	2.91636	2.36748	N/A	N/A
MYOG	2.14152	3.12189	N/A	N/A
PDGFRA	2.24304	3.01348	N/A	N/A
NOTCH2	3.1513	2.08757	N/A	N/A
NEUROG3	2.662	2.54594	N/A	N/A
RARG	2.50607	2.69997	N/A	N/A
SMAD1	2.50607	2.69997	N/A	N/A
cardiotoxin	2.3097	N/A	2.89303	N/A
MSTN	2.12389	1.55141	1.51295	N/A
SOX9	2.48633	1.36533	1.32817	N/A
sorafenib	2.48583	1.35597	1.32885	N/A
Shc	1.60619	2.12261	N/A	1.42254
FGFR1	2.17592	1.50962	1.4624	N/A
miR-451a (and other miRNAs w/seed AACCGUU)	1.60619	N/A	2.09348	1.42254
miR-223-3p (miRNAs w/seed GUCAGUU)	1.60619	N/A	2.09348	1.42254
Laminin	2.45849	2.65995	N/A	N/A
Hedgehog	2.08698	1.52876	1.49044	N/A
fulvestrant	2.63086	N/A	2.46213	N/A
cyclic AMP	2.63086	N/A	2.46213	N/A
SIX1	2.62352	2.45777	N/A	N/A
MST1R	1.947	1.57731	1.54939	N/A
CREBBP	2.399	2.6644	N/A	N/A
ZFPM2	2.16095	N/A	2.88421	N/A
OTX2	2.27325	2.77184	N/A	N/A
ID2	2.39248	2.6469	N/A	N/A
LDLR	2.12365	1.47881	1.4319	N/A
BRD2	2.05101	1.50665	1.46847	N/A
AGT	2.42195	2.58938	N/A	N/A
SMAD4	2.1071	1.59391	N/A	1.30945
SLC4A5	1.30478	1.57364	N/A	2.11492
UBA3	1.30478	1.57364	N/A	2.11492
FHOD1	1.30478	1.57364	N/A	2.11492
MNAT1	1.30478	1.57364	N/A	2.11492
DEVD-Cho	1.30478	1.57364	N/A	2.11492
BOC	1.30478	1.57364	N/A	2.11492
MESP1	1.30478	1.57364	N/A	2.11492
ENTPD5	2.22327	2.75652	N/A	N/A
NACA	2.22327	2.75652	N/A	N/A
Hist1h1e	2.22327	2.75652	N/A	N/A
TRIM71	2.22327	2.75652	N/A	N/A
NIF3L1	1.30478	N/A	1.55865	2.11492
HNRNPL	1.30478	N/A	1.55865	2.11492
GFRA1	1.30478	N/A	1.55865	2.11492
TBX4	1.30478	N/A	1.55865	2.11492
CDC42	2.94884	N/A	2.00811	N/A
ZMIZ2	2.22327	N/A	2.7267	N/A
temsirolimus	2.22327	N/A	2.7267	N/A
YY2	2.22327	N/A	2.7267	N/A
RBM14	2.22327	N/A	2.7267	N/A
NR6A1	1.52622	2.03931	N/A	1.38197
ethanol	2.02384	2.92324	N/A	N/A
Smad2/3-Smad4	2.0847	2.84763	N/A	N/A
triclosan	2.0847	2.84763	N/A	N/A
carvedilol	1.88446	1.53536	1.50757	N/A
NANOG	1.98462	2.94036	N/A	N/A
RETNLB	2.49562	2.41961	N/A	N/A
Foxp1	2.88644	2.01197	N/A	N/A
AGN194204	1.65405	1.63654	1.57214	N/A
ST1926	1.66935	N/A	1.58353	1.60806
CDKN1A	2.428	N/A	2.43114	N/A
BCL6	2.08768	1.41072	1.35679	N/A
RHO	1.8529	2.99902	N/A	N/A
decitabine	2.597	2.24072	N/A	N/A
CD 437	1.84295	N/A	1.61145	1.35543
RHOA	2.43305	2.37185	N/A	N/A
lithium chloride	2.32778	N/A	2.4744	N/A
ERK	1.86058	2.93608	N/A	N/A
potassium chloride	1.74311	3.05126	N/A	N/A
BMI1	2.28177	2.51048	N/A	N/A
OXT	1.82555	1.4957	1.46804	N/A
AZGP1	1.82555	1.4957	1.46804	N/A
PDGFC	1.82555	1.4957	1.46804	N/A
HSPA9	1.82555	1.4957	1.46804	N/A
BARX2	2.01358	2.77276	N/A	N/A
CEBPB	2.24615	2.53974	N/A	N/A
Pdgf (complex)	1.99977	1.40554	1.35939	N/A
6-bromoindirubin-3' oxime	2.01358	N/A	2.72965	N/A
TWIST1	2.35028	2.38822	N/A	N/A
I kappa b kinase	1.4542	N/A	1.93511	1.345
CTSB	2.42187	2.30391	N/A	N/A
ursolic acid	1.82255	N/A	2.89771	N/A
NOTCH1	2.36193	N/A	2.35466	N/A
COMMD3-BMI1	1.87064	2.82733	N/A	N/A
KDM5B	N/A	N/A	1.93384	2.73481
RBL2	1.95277	1.37764	1.33179	N/A
LNX2	2.65112	N/A	2.01031	N/A
IL2	1.89016	1.435	1.33489	N/A
PRKCB	1.88397	1.40348	1.36603	N/A
naltrexone	1.947	2.70244	N/A	N/A
emricasan	2.05444	2.5843	N/A	N/A
SF1	2.05444	2.5843	N/A	N/A
PD 123319	2.36081	2.25704	N/A	N/A
CP-55940	1.83083	2.78359	N/A	N/A
IL5	1.92152	N/A	2.68992	N/A
PLSCR1	2.05444	N/A	2.55461	N/A
STX2	2.05444	N/A	2.55461	N/A
ETV1	1.947	N/A	2.65949	N/A
Growth hormone	1.82639	2.77692	N/A	N/A
AK1	1.3888	1.89526	N/A	1.31106
Notch	2.02694	2.54594	N/A	N/A
REST	2.43328	N/A	2.13853	N/A
CD3	1.96925	2.59231	N/A	N/A
EPO	2.25805	2.28709	N/A	N/A
BRCA1	1.52293	N/A	1.47403	1.54134
NFATC3	2.44887	2.08903	N/A	N/A
CTR9	1.71721	1.42239	1.395	N/A
pregna-4,17-diene-3,16-dione	1.71721	1.42239	1.395	N/A
GPC1	2.30244	2.21211	N/A	N/A
methotrexate	1.71696	2.78495	N/A	N/A
NOG	2.12389	2.37576	N/A	N/A
SOX6	2.53431	1.96398	N/A	N/A
topiramate	2.53431	1.96398	N/A	N/A
VGLL3	2.53431	1.96398	N/A	N/A
CD38	2.21169	2.28006	N/A	N/A
ADAM10	2.28556	N/A	2.1961	N/A
miR-92a-3p (and other miRNAs w/seed AUUGCAC)	2.30244	N/A	2.17053	N/A
PITX1	2.53431	N/A	1.93511	N/A
MAML1	2.53431	N/A	1.93511	N/A
cadmium chloride	1.43796	1.52876	1.49044	N/A
FLT1	1.99874	N/A	2.45545	N/A
TNFSF12	1.56787	1.46374	1.41698	N/A
CNBP	1.30478	1.57364	1.55865	N/A
butyrine	1.30478	1.57364	1.55865	N/A
PPP2R5A	1.30478	1.57364	1.55865	N/A
ADI PEG20	1.30478	1.57364	1.55865	N/A
5-oxo-6-8-11-14-(e,z,z,z)-eicosatetraenoic acid	1.30478	1.57364	1.55865	N/A
dibromoacetic acid	1.30478	1.57364	1.55865	N/A
FOXO6	1.30478	1.57364	1.55865	N/A
STAM	1.30478	1.57364	1.55865	N/A
RPL15	1.30478	1.57364	1.55865	N/A
EIF4F	1.30478	1.57364	1.55865	N/A
RPA2	1.30478	1.57364	1.55865	N/A
ROBO1	1.30478	1.57364	1.55865	N/A
Gm-Csf Receptor	1.30478	1.57364	1.55865	N/A
Usp17la (includes others)	1.30478	1.57364	1.55865	N/A
NOSIP	1.30478	1.57364	1.55865	N/A
BCAS3	1.30478	1.57364	1.55865	N/A
AMD1	1.30478	1.57364	1.55865	N/A
butylbenzyl phthalate	1.30478	1.57364	1.55865	N/A
mir-383	1.30478	1.57364	1.55865	N/A
EEF1A1	1.30478	1.57364	1.55865	N/A
RPS14	1.30478	1.57364	1.55865	N/A
RBMS3	1.30478	1.57364	1.55865	N/A
STRA13	1.30478	1.57364	1.55865	N/A
STAM2	1.30478	1.57364	1.55865	N/A
FAM103A1	1.30478	1.57364	1.55865	N/A
MED26	1.30478	1.57364	1.55865	N/A
phenoxyacetic acid	1.30478	1.57364	1.55865	N/A
NME2	1.30478	1.57364	1.55865	N/A
OMG	1.30478	1.57364	1.55865	N/A
CSDE1	1.30478	1.57364	1.55865	N/A
WASH1	1.30478	1.57364	1.55865	N/A
EDF1	1.30478	1.57364	1.55865	N/A
carboplatin	2.08698	2.34409	N/A	N/A
STAT3	1.67052	2.74972	N/A	N/A
PKM	1.66721	1.3884	1.36114	N/A
Stat3-Stat3	1.66721	1.3884	1.36114	N/A
GRP	2.24655	2.16897	N/A	N/A
IKZF1	2.29628	2.11078	N/A	N/A
Collagen type IV	1.82555	2.57353	N/A	N/A
BHLHE40	1.82555	2.57353	N/A	N/A
BMP6	1.58855	1.47881	N/A	1.32722
methylprednisolone	2.63971	N/A	1.74308	N/A
ICAM1	1.71893	2.65995	N/A	N/A
JUN	2.02861	2.34271	N/A	N/A
PD98059	2.22842	2.13944	N/A	N/A
S-allyl-L-cysteine	1.91555	2.44204	N/A	N/A
vitamin E	2.34127	2.0142	N/A	N/A
CDX2	1.7986	2.54859	N/A	N/A
ZIC3	1.3888	N/A	N/A	2.95501
KDM5A	2.25267	2.07915	N/A	N/A
AKIRIN2	1.91555	N/A	2.41249	N/A
SETD7	1.91555	N/A	2.41249	N/A
RBCK1	1.91555	N/A	2.41249	N/A
TNF	2.24775	2.07909	N/A	N/A
OTX1	2.42848	1.89526	N/A	N/A
cerivastatin	1.891	2.41961	N/A	N/A
Smad	1.61968	1.35597	1.32885	N/A
NKX3-1	2.01594	2.28293	N/A	N/A
L-asparagine	2.43784	N/A	N/A	1.81554
L-alanine	2.43784	N/A	N/A	1.81554
RNF31	1.7699	N/A	2.47167	N/A
BBI608	2.27325	1.96671	N/A	N/A
Hmgn3	2.14152	2.08757	N/A	N/A
PRDM5	1.83997	2.37185	N/A	N/A
valproic acid	2.04528	2.13026	N/A	N/A
5-N-ethylcarboxamido adenosine	2.30275	1.86162	N/A	N/A
MAPK8IP3	2.33185	1.83215	N/A	N/A
HSPG2	2.33185	1.83215	N/A	N/A
MIF	1.81512	2.34852	N/A	N/A
quinolinic acid	1.61703	2.54635	N/A	N/A
FOXM1	2.32778	N/A	1.81883	N/A
RUNX2	1.69744	2.44735	N/A	N/A
ESR1	2.0318	2.10691	N/A	N/A
SPRY1	2.33185	N/A	1.80356	N/A
NR2E1	1.71721	N/A	2.41543	N/A
SP4	1.71721	N/A	2.41543	N/A
LY294002	1.59397	2.52519	N/A	N/A
OCT4-NANOG	1.79784	2.32096	N/A	N/A
nilotinib	1.79784	2.32096	N/A	N/A
DCLK1	1.79784	2.32096	N/A	N/A
acrylamide	1.79784	2.32096	N/A	N/A
proteasome inhibitor	1.79784	2.32096	N/A	N/A
AQP7	1.79784	2.32096	N/A	N/A
AVPR1A	1.79784	2.32096	N/A	N/A
GNAQ	2.09207	N/A	2.00811	N/A
5-nitro-2-(3-phenylpropylamino)benzoic acid	1.79784	N/A	2.29155	N/A
YBX3	1.79784	N/A	2.29155	N/A
TCF/LEF	1.79784	N/A	2.29155	N/A
CSNK2B	1.79784	N/A	2.29155	N/A
PRKCG	1.79784	N/A	2.29155	N/A
IQGAP1	1.79784	N/A	2.29155	N/A
WNT7B	1.79784	N/A	2.29155	N/A
MFGE8	1.79784	N/A	2.29155	N/A
miR-208a-3p (and other miRNAs w/seed UAAGACG)	1.79784	N/A	2.29155	N/A
PRKCH	1.79784	N/A	2.29155	N/A
ARHGEF1	1.79784	N/A	2.29155	N/A
FOXO1	1.90115	2.17319	N/A	N/A
AVP	2.36755	1.70006	N/A	N/A
GHRL	1.88397	2.16858	N/A	N/A
RPS6KB1	1.95447	N/A	N/A	2.09641
IHH	1.66721	N/A	2.36189	N/A
PIK3CA	2.36755	N/A	1.66071	N/A
mir-214	2.24304	1.77384	N/A	N/A
Fgfr	2.24304	1.77384	N/A	N/A
SU6656	2.04449	N/A	1.97114	N/A
MECOM	N/A	N/A	1.46804	2.53357
HGF	2.19065	1.80763	N/A	N/A
pyridoxine	2.24304	N/A	1.74538	N/A
THRAP3	2.24304	N/A	1.74538	N/A
Histone h3	1.39874	2.57741	N/A	N/A
ABL1	1.99866	1.97613	N/A	N/A
PARK2	1.99866	1.97613	N/A	N/A
PIAS1	1.99866	1.97613	N/A	N/A
TCF4	2.14526	N/A	1.82662	N/A
mir-8	2.11482	1.8555	N/A	N/A
benzo(a)pyrene	1.97265	1.97565	N/A	N/A
L-aspartic acid	2.22327	N/A	N/A	1.71946
silicon phthalocyanine	2.22327	N/A	N/A	1.71946
KRT10	2.22327	N/A	N/A	1.71946
EFNA2	1.8529	N/A	2.08947	N/A
HBEGF	1.99866	N/A	1.93544	N/A
CASR	1.61968	N/A	2.31082	N/A
DICER1	2.12346	N/A	1.80655	N/A
EBF1	1.80766	2.11078	N/A	N/A
RASSF1	1.71991	N/A	2.1961	N/A
EYA1	1.6959	2.21567	N/A	N/A
2-deoxyglucose	1.82255	N/A	2.06311	N/A
RB1CC1	1.6959	N/A	2.1864	N/A
Bcl9-Cbp/p300-Ctnnb1-Lef/Tcf	1.6959	N/A	2.1864	N/A
bevacizumab	1.6959	N/A	2.1864	N/A
GUSB	1.6959	N/A	2.1864	N/A
MEMO1	1.6959	N/A	2.1864	N/A
KLF9	2.16095	1.71967	N/A	N/A
EIF2AK3	1.92978	N/A	1.92155	N/A
FOXC2	1.49436	N/A	2.35472	N/A
diazoxide	1.57441	N/A	2.26202	N/A
benzyloxycarbonyl-Leu-Leu-Leu aldehyde	2.11127	1.71741	N/A	N/A
Cg	2.48863	1.33297	N/A	N/A
ZNF217	2.02694	1.79342	N/A	N/A
RBL1	2.05568	N/A	1.76391	N/A
PRKCE	2.05568	N/A	1.76391	N/A
CD47	1.53122	2.25704	N/A	N/A
lactacystin	1.99357	1.79044	N/A	N/A
DMRT1	1.35371	2.41961	N/A	N/A
SMO	1.99874	1.77344	N/A	N/A
ATP	1.8848	N/A	1.88642	N/A
GnRH-A	2.02694	N/A	1.74374	N/A
glutamyl-Se-methylselenocysteine	2.0847	1.66913	N/A	N/A
quinpirole	2.0847	1.66913	N/A	N/A
progestin	1.53122	N/A	2.21531	N/A
ALK	1.60619	2.12261	N/A	N/A
beraprost	1.60619	2.12261	N/A	N/A
tacrolimus	1.99357	N/A	1.71657	N/A
phorbol 12,13-didecanoate	1.48996	2.21211	N/A	N/A
NQO2	1.60619	N/A	2.09348	N/A
IAPP	1.60619	N/A	2.09348	N/A
TFF2	2.05444	N/A	N/A	1.6411
TP73	1.40629	2.28614	N/A	N/A
NOTCH3	2.16178	1.52876	N/A	N/A
IGF2	2.06446	1.62509	N/A	N/A
IGF1R	1.57978	2.10903	N/A	N/A
SOX7	1.71893	N/A	N/A	1.96359
IL22	1.56787	2.11356	N/A	N/A
NCOA1	1.7986	1.87816	N/A	N/A
NEUROD1	1.83083	1.84403	N/A	N/A
ADRB2	1.83083	1.84403	N/A	N/A
miR-145-5p (and other miRNAs w/seed UCCAGUU)	1.38448	2.28293	N/A	N/A
AICAR	1.38448	2.28293	N/A	N/A
NF1	1.48996	N/A	2.17053	N/A
RNA polymerase II	1.55007	2.10514	N/A	N/A
KAT5	1.77781	1.86162	N/A	N/A
NFASC	2.01358	1.6218	N/A	N/A
Ctbp	2.01358	1.6218	N/A	N/A
GLIS2	2.01358	1.6218	N/A	N/A
HMGA2	2.01358	1.6218	N/A	N/A
E2F2	1.65404	1.96671	N/A	N/A
Collagen type I	1.65404	1.96671	N/A	N/A
sulindac	1.65404	1.96671	N/A	N/A
PBX1	1.45047	2.16897	N/A	N/A
butyric acid	2.14822	1.46784	N/A	N/A
mir-27	2.08698	1.52876	N/A	N/A
EGLN1	1.38448	N/A	2.2301	N/A
AXIN1	2.01358	N/A	1.59374	N/A
TEAD1	2.01358	N/A	1.59374	N/A
tetraethylammonium	1.79232	1.81352	N/A	N/A
verapamil	1.79232	1.81352	N/A	N/A
KIT	1.5275	2.07465	N/A	N/A
GATA3	1.48358	N/A	N/A	2.10513
SOX11	1.891	1.6968	N/A	N/A
MAP2K1	1.52293	2.04261	N/A	N/A
PTGES	1.35876	N/A	2.20071	N/A
SFRP4	1.52622	N/A	2.01031	N/A
CCNT1	1.52622	N/A	2.01031	N/A
clonidine	1.52622	N/A	2.01031	N/A
miR-129-5p (miRNAs w/seed UUUUUGC)	1.52622	N/A	2.01031	N/A
Ins1	1.55121	1.98454	N/A	N/A
BMP7	1.92348	1.60876	N/A	N/A
ionomycin	1.96116	1.55844	N/A	N/A
MYOCD	1.83997	1.66032	N/A	N/A
PLAT	1.41265	N/A	2.08621	N/A
riboflavin	1.947	N/A	1.54939	N/A
PPARG	1.44039	2.0539	N/A	N/A
C1orf61	1.91555	N/A	N/A	1.57498
VTCN1	1.91555	N/A	N/A	1.57498
L-proline	1.91555	N/A	N/A	1.57498
MUC1	1.71893	1.75516	N/A	N/A
CAND1	1.60034	1.87175	N/A	N/A
MYLPF	1.60034	1.87175	N/A	N/A
OSBP	1.60034	1.87175	N/A	N/A
diacetylbis(4-methylthiosemicarbazonato)copper(II)	1.60034	1.87175	N/A	N/A
ALX4	1.60034	1.87175	N/A	N/A
RXFP1	1.60034	1.87175	N/A	N/A
SIX2	1.60034	1.87175	N/A	N/A
FGF20	1.60034	1.87175	N/A	N/A
nefazodone	1.60034	1.87175	N/A	N/A
Ctf2	1.60034	1.87175	N/A	N/A
nalfurafine	1.60034	1.87175	N/A	N/A
asimadoline	1.60034	1.87175	N/A	N/A
salvinorin a	1.60034	1.87175	N/A	N/A
SLC26A1	1.60034	1.87175	N/A	N/A
TBX18	1.60034	1.87175	N/A	N/A
N(6)-methyl-2'-deoxyadenosine	1.60034	1.87175	N/A	N/A
EYA2	1.60034	1.87175	N/A	N/A
cineole	1.60034	1.87175	N/A	N/A
Cathepsin	1.60034	1.87175	N/A	N/A
TSTA3	1.60034	1.87175	N/A	N/A
GABARAPL1	1.60034	1.87175	N/A	N/A
Ikzf1	1.60034	1.87175	N/A	N/A
HAS2-AS1	1.60034	1.87175	N/A	N/A
LRRN1	1.60034	1.87175	N/A	N/A
4-hydroxymercuribenzoate	1.60034	1.87175	N/A	N/A
PDGF-Rβ dimer	1.60034	1.87175	N/A	N/A
cicletanine	1.60034	1.87175	N/A	N/A
avobenzone	1.60034	1.87175	N/A	N/A
STK38	1.60034	1.87175	N/A	N/A
NSC117079	1.60034	1.87175	N/A	N/A
Nectin	1.60034	1.87175	N/A	N/A
3,4-dideoxyglucosone-3-ene	1.60034	1.87175	N/A	N/A
EYA3	1.60034	1.87175	N/A	N/A
nardostachys chinensis extract	1.60034	1.87175	N/A	N/A
TBPL2	1.60034	1.87175	N/A	N/A
PPP1R3G	1.60034	1.87175	N/A	N/A
TRIM72	1.60034	1.87175	N/A	N/A
GJB2	1.60034	1.87175	N/A	N/A
mir-506	1.60034	1.87175	N/A	N/A
miR-3612 (and other miRNAs w/seed GGAGGCA)	1.60034	1.87175	N/A	N/A
xylose	1.60034	1.87175	N/A	N/A
DTX2	1.60034	1.87175	N/A	N/A
SDR9C7	1.60034	1.87175	N/A	N/A
bremazocine	1.60034	1.87175	N/A	N/A
PLEKHO1	1.60034	1.87175	N/A	N/A
FAIM	1.60034	1.87175	N/A	N/A
DRAM1	1.60034	1.87175	N/A	N/A
PAFAH2	1.60034	1.87175	N/A	N/A
fucose	1.60034	1.87175	N/A	N/A
ethylketocyclazocine	1.60034	1.87175	N/A	N/A
PIGG	1.60034	1.87175	N/A	N/A
Mst/krs	1.60034	1.87175	N/A	N/A
myrcene	1.60034	1.87175	N/A	N/A
CHL1	1.60034	1.87175	N/A	N/A
IL4	1.43997	2.0305	N/A	N/A
ABCB4	1.37636	2.08757	N/A	N/A
Integrin alpha 5 beta 1	1.60034	N/A	1.85666	N/A
CLEC16A	1.60034	N/A	1.85666	N/A
GKN1	1.60034	N/A	1.85666	N/A
IRX5	1.60034	N/A	1.85666	N/A
PMS2	1.60034	N/A	1.85666	N/A
FBXO31	1.60034	N/A	1.85666	N/A
Ro 20-1724	1.60034	N/A	1.85666	N/A
Tenascin	1.60034	N/A	1.85666	N/A
KIAA0196	1.60034	N/A	1.85666	N/A
Hmgn2 (includes others)	1.60034	N/A	1.85666	N/A
EAF1	1.60034	N/A	1.85666	N/A
TOB2	1.60034	N/A	1.85666	N/A
NCK	1.60034	N/A	1.85666	N/A
beta-penta-O-galloyl-glucose	1.60034	N/A	1.85666	N/A
hydroxamic acid	1.60034	N/A	1.85666	N/A
buspirone	1.60034	N/A	1.85666	N/A
SRRT	1.60034	N/A	1.85666	N/A
ADAMTS7	1.60034	N/A	1.85666	N/A
TBX19	1.60034	N/A	1.85666	N/A
6-thioguanylic acid	1.60034	N/A	1.85666	N/A
6-thioguanosine	1.60034	N/A	1.85666	N/A
PTOV1	1.60034	N/A	1.85666	N/A
GTPBP4	1.60034	N/A	1.85666	N/A
SERPINA6	1.60034	N/A	1.85666	N/A
MYH6	1.60034	N/A	1.85666	N/A
CDK20	1.60034	N/A	1.85666	N/A
mir-499	1.60034	N/A	1.85666	N/A
EVA1C	1.60034	N/A	1.85666	N/A
KRT71	1.60034	N/A	1.85666	N/A
glucuronic acid	1.60034	N/A	1.85666	N/A
PTPRU	1.60034	N/A	1.85666	N/A
MED15	1.60034	N/A	1.85666	N/A
CALCOCO1	1.60034	N/A	1.85666	N/A
ZG16B	1.60034	N/A	1.85666	N/A
URGCP	1.60034	N/A	1.85666	N/A
amlexanox	1.60034	N/A	1.85666	N/A
CD164	1.60034	N/A	1.85666	N/A
PLAC1	1.60034	N/A	1.85666	N/A
CCNDBP1	1.60034	N/A	1.85666	N/A
RPLP0	1.60034	N/A	1.85666	N/A
AVPR1B	1.60034	N/A	1.85666	N/A
ADCY3	1.60034	N/A	1.85666	N/A
tetramethylpyrazine	1.60034	N/A	1.85666	N/A
UPF3B	1.60034	N/A	1.85666	N/A
KIF5A	1.60034	N/A	1.85666	N/A
dextrorphan	1.60034	N/A	1.85666	N/A
KCNJ12	1.60034	N/A	1.85666	N/A
sulfaphenazole	1.60034	N/A	1.85666	N/A
ADCY2	1.60034	N/A	1.85666	N/A
calcitriol	1.40124	2.03896	N/A	N/A
plicamycin	1.45046	1.98184	N/A	N/A
bortezomib	1.56376	N/A	1.85973	N/A
naloxone	1.88446	1.53536	N/A	N/A
PLD1	1.4542	1.96398	N/A	N/A
miR-375-3p (and other miRNAs w/seed UUGUUCG)	1.4542	1.96398	N/A	N/A
GREM1	1.4542	1.96398	N/A	N/A
APC	1.43193	1.98184	N/A	N/A
bleomycin	1.71617	1.68333	N/A	N/A
PSEN1	1.52943	1.86881	N/A	N/A
miR-296-5p (miRNAs w/seed GGGCCCC)	1.88446	N/A	1.50757	N/A
CRYAB	1.88446	N/A	1.50757	N/A
IGFBP5	1.88446	N/A	1.50757	N/A
CASP1	1.34151	2.04909	N/A	N/A
embelin	1.4542	N/A	1.93511	N/A
1,2-dimethylhydrazine	1.4542	N/A	1.93511	N/A
EPCAM	1.4542	N/A	1.93511	N/A
BMP10	1.4542	N/A	1.93511	N/A
epinephrine	1.9172	N/A	N/A	1.46008
GRB2	1.52374	N/A	N/A	1.85004
EFNA4	1.68393	N/A	1.68773	N/A
15-deoxy-delta-12,14 -PGJ 2	1.4156	1.95397	N/A	N/A
ACVRL1	1.34151	N/A	2.00811	N/A
Rxr	1.39571	1.94639	N/A	N/A
ARID3A	N/A	1.40046	N/A	1.93965
TCEB3	N/A	1.40046	N/A	1.93965
STIL	N/A	1.40046	N/A	1.93965
SRFBP1	N/A	1.40046	N/A	1.93965
CFC1/CFC1B	N/A	1.40046	N/A	1.93965
Ank2	N/A	1.40046	N/A	1.93965
PYCR2	N/A	1.40046	N/A	1.93965
PTEN	1.5383	1.79699	N/A	N/A
NOD2	1.52922	N/A	1.80534	N/A
NKX2-1	1.84771	1.48483	N/A	N/A
KLF2	1.55129	N/A	1.78032	N/A
TAF7L	N/A	N/A	1.51295	1.81561
SB-431542	1.7667	N/A	1.55961	N/A
SMYD2	N/A	N/A	1.38557	1.93965
FGF1	1.60293	1.72153	N/A	N/A
miR-203a-3p (and other miRNAs w/seed UGAAAUG)	1.82555	1.4957	N/A	N/A
CALR	1.30802	2.01197	N/A	N/A
S-adenosylmethionine	1.30802	2.01197	N/A	N/A
TDGF1	1.79784	N/A	N/A	1.51781
rhodamine 6G	1.79784	N/A	N/A	1.51781
HMGA1	1.52028	N/A	1.79362	N/A
NME1	1.64997	N/A	1.66071	N/A
EFNA3	1.64997	N/A	1.66071	N/A
PAX2	1.82555	N/A	1.46804	N/A
bisphenol A diglycidyl ether	1.3888	1.89526	N/A	N/A
leupeptin	1.3888	1.89526	N/A	N/A
histone deacetylase inhibitor	1.30802	N/A	1.97114	N/A
HDAC4	1.58477	1.69237	N/A	N/A
miR-19b-3p (and other miRNAs w/seed GUGCAAA)	1.3888	N/A	1.86654	N/A
cyproterone acetate	1.3888	N/A	1.86654	N/A
(+)-MK-801	1.46018	1.79342	N/A	N/A
NFYB	1.72247	1.52904	N/A	N/A
NOTCH4	1.82555	1.42239	N/A	N/A
TCOF1	1.48274	N/A	1.76391	N/A
PRKCI	1.7699	1.45811	N/A	N/A
D-glucose	1.62238	1.60216	N/A	N/A
curcumin	1.85724	1.35907	N/A	N/A
ERBB4	1.67467	1.54135	N/A	N/A
MKL1	1.7349	1.4811	N/A	N/A
HNF1A	1.52992	N/A	1.68491	N/A
PTH1R	1.7699	N/A	1.43058	N/A
p70 S6k	1.7699	N/A	1.43058	N/A
UBE3A	1.7699	N/A	1.43058	N/A
EFNA5	1.58503	N/A	1.60885	N/A
ERBB3	1.65261	1.52537	N/A	N/A
MITF	1.7808	1.38843	N/A	N/A
JAK2	1.51448	1.64986	N/A	N/A
RGS4	1.6959	N/A	N/A	1.46748
CCND2	1.6959	N/A	N/A	1.46748
bosutinib	1.6959	N/A	N/A	1.46748
GFI1B	1.32898	1.83215	N/A	N/A
LAMC1	1.32898	1.83215	N/A	N/A
YWHAG	1.32898	1.83215	N/A	N/A
meclizine	1.32898	1.83215	N/A	N/A
oxymatrine	1.71721	1.42239	N/A	N/A
folic acid	1.55395	N/A	1.58394	N/A
Ptprd	1.32898	N/A	1.80356	N/A
gambogic acid	1.32898	N/A	1.80356	N/A
dihydroartemisinin	1.32898	N/A	1.80356	N/A
GTF2I	1.32898	N/A	1.80356	N/A
myricetin	1.32898	N/A	1.80356	N/A
NHLH2	1.32898	N/A	1.80356	N/A
nifedipine	1.39509	1.73448	N/A	N/A
GNA12	1.39509	1.73448	N/A	N/A
SYVN1	1.68252	1.44537	N/A	N/A
ADCYAP1	1.79385	N/A	1.32957	N/A
FGF9	1.71721	N/A	1.395	N/A
miR-30a-3p (and other miRNAs w/seed UUUCAGU)	1.71721	N/A	1.395	N/A
KN-62	1.71721	N/A	1.395	N/A
PML	1.48068	1.62231	N/A	N/A
dihydrotestosterone	1.55242	1.55016	N/A	N/A
MYOC	1.63091	N/A	1.4624	N/A
MMP9	1.76387	1.32877	N/A	N/A
CCL2	1.39509	N/A	1.68526	N/A
EP300	1.47713	1.59522	N/A	N/A
halofuginone	1.64859	1.42215	N/A	N/A
LTBR	1.49436	1.57463	N/A	N/A
garcinol	1.58855	1.47881	N/A	N/A
MAPK1	1.35193	N/A	1.71078	N/A
SMAD7	1.44773	1.59536	N/A	N/A
WNT1	1.44773	1.59536	N/A	N/A
HDAC1	1.70447	1.33193	N/A	N/A
FZR1	1.60619	N/A	N/A	1.42254
2-hydroxy-1-naphthylaldehyde isonicotinoyl hydrazone	1.60619	N/A	N/A	1.42254
CAMK2N2	1.60619	N/A	N/A	1.42254
dexamethasone phosphate	1.66721	N/A	1.36114	N/A
CDK9	1.46578	1.55141	N/A	N/A
L-dopa	1.69552	N/A	1.30132	N/A
doxorubicin	1.50244	1.47444	N/A	N/A
RUNX3	1.43796	1.52876	N/A	N/A
FST	1.43796	1.52876	N/A	N/A
E2f	1.43157	N/A	1.52598	N/A
SPI1	N/A	N/A	1.60135	1.3502
NR2C2	1.61968	N/A	1.32885	N/A
SPRY2	1.61968	N/A	1.32885	N/A
IL11	1.43796	N/A	1.49044	N/A
L-serine	1.52622	N/A	N/A	1.38197
tetrodotoxin	1.57441	1.32499	N/A	N/A
NPR1	1.57441	1.32499	N/A	N/A
gemcitabine	1.41087	N/A	1.46847	N/A
17beta-estradiol dendrimer conjugate	1.30478	1.57364	N/A	N/A
toluene	1.30478	1.57364	N/A	N/A
GNPAT	1.30478	1.57364	N/A	N/A
REG3A	1.30478	1.57364	N/A	N/A
verteporfin	1.30478	1.57364	N/A	N/A
2005-09-01	1.30478	1.57364	N/A	N/A
HADHA	1.30478	1.57364	N/A	N/A
3-(p-methoxy)phenyl-1,4-benzoxazine	1.30478	1.57364	N/A	N/A
PTPRT	1.30478	1.57364	N/A	N/A
Gsta4	1.30478	1.57364	N/A	N/A
AKIRIN1	1.30478	1.57364	N/A	N/A
TYSND1	1.30478	1.57364	N/A	N/A
ARHGEF12	1.30478	1.57364	N/A	N/A
SDC3	1.30478	1.57364	N/A	N/A
domperidone	1.30478	1.57364	N/A	N/A
ARID5B	1.30478	1.57364	N/A	N/A
SLC9A6	1.30478	1.57364	N/A	N/A
4-amidinoindan-1-one 2'-amidinohydrazone	1.30478	1.57364	N/A	N/A
etorphine	1.30478	1.57364	N/A	N/A
CUX2	1.30478	1.57364	N/A	N/A
T-type Calcium Channel	1.30478	1.57364	N/A	N/A
ruxolitinib	1.30478	1.57364	N/A	N/A
Col17a1	1.30478	1.57364	N/A	N/A
TRAM2	1.30478	1.57364	N/A	N/A
AZIN1	1.30478	1.57364	N/A	N/A
STK38L	1.30478	1.57364	N/A	N/A
tyrphostin AG 1295	1.30478	1.57364	N/A	N/A
SLV320	1.30478	1.57364	N/A	N/A
NID1	1.30478	1.57364	N/A	N/A
Sphk	1.30478	1.57364	N/A	N/A
AANAT	1.30478	1.57364	N/A	N/A
HSD17B13	1.30478	1.57364	N/A	N/A
TIMM50	1.30478	1.57364	N/A	N/A
ACTC1	1.30478	1.57364	N/A	N/A
aprotinin	1.30478	1.57364	N/A	N/A
MDFI	1.30478	1.57364	N/A	N/A
GABARAP	1.30478	1.57364	N/A	N/A
EHD3	1.30478	1.57364	N/A	N/A
SS18	1.30478	1.57364	N/A	N/A
miR-483-5p (miRNAs w/seed AGACGGG)	1.30478	1.57364	N/A	N/A
S-adenosylhomocysteine	1.30478	1.57364	N/A	N/A
Rbp	1.30478	1.57364	N/A	N/A
PABPN1	1.30478	1.57364	N/A	N/A
SRXN1	1.30478	1.57364	N/A	N/A
RBBP8	1.30478	N/A	1.55865	N/A
2,5-di-tert-butylhydroquinone	1.30478	N/A	1.55865	N/A
DAPK3	1.30478	N/A	1.55865	N/A
mir-574	1.30478	N/A	1.55865	N/A
NASP	1.30478	N/A	1.55865	N/A
NPBWR1	1.30478	N/A	1.55865	N/A
EIF4H	1.30478	N/A	1.55865	N/A
phosphorylethanolamine	1.30478	N/A	1.55865	N/A
hexaarginine-neomycin B conjugate	1.30478	N/A	1.55865	N/A
ETS-ELK1	1.30478	N/A	1.55865	N/A
TRPC6	1.30478	N/A	1.55865	N/A
AP1M1	1.30478	N/A	1.55865	N/A
NEUROD4	1.30478	N/A	1.55865	N/A
nitrosomethylurethane	1.30478	N/A	1.55865	N/A
AGO1	1.30478	N/A	1.55865	N/A
GLUL	1.30478	N/A	1.55865	N/A
neratinib	1.30478	N/A	1.55865	N/A
OSI-027	1.30478	N/A	1.55865	N/A
levorphanol	1.30478	N/A	1.55865	N/A
sorafenib derivative SC-1	1.30478	N/A	1.55865	N/A
SCLY	1.30478	N/A	1.55865	N/A
SRPK2	1.30478	N/A	1.55865	N/A
SNF8	1.30478	N/A	1.55865	N/A
AGO3	1.30478	N/A	1.55865	N/A
FKHR	1.30478	N/A	1.55865	N/A
AGO4	1.30478	N/A	1.55865	N/A
RAC3	1.30478	N/A	1.55865	N/A
inostamycin	1.30478	N/A	1.55865	N/A
VENTX	1.30478	N/A	1.55865	N/A
SGI 1776	1.30478	N/A	1.55865	N/A
TNNT2	1.30478	N/A	1.55865	N/A
SCG5	1.30478	N/A	1.55865	N/A
mir-346	1.30478	N/A	1.55865	N/A
FRZB	1.30478	N/A	1.55865	N/A
BCLAF1	1.30478	N/A	1.55865	N/A
FBXO4	1.30478	N/A	1.55865	N/A
SYNJ2BP	1.30478	N/A	1.55865	N/A
WASF1	1.30478	N/A	1.55865	N/A
HES7	1.30478	N/A	1.55865	N/A
RRAD	1.30478	N/A	1.55865	N/A
RPLP2	1.30478	N/A	1.55865	N/A
GNAZ	1.30478	N/A	1.55865	N/A
ILKAP	1.30478	N/A	1.55865	N/A
PTPRF	1.30478	N/A	1.55865	N/A
NSC 651016	1.30478	N/A	1.55865	N/A
miR-574-5p (miRNAs w/seed GAGUGUG)	1.30478	N/A	1.55865	N/A
methoxamine	1.30478	N/A	1.55865	N/A
isopropyl thiogalactoside	1.30478	N/A	1.55865	N/A
CGGBP1	1.30478	N/A	1.55865	N/A
DPH1	1.30478	N/A	1.55865	N/A
doxercalciferol	1.30478	N/A	1.55865	N/A
COMP	1.30478	N/A	1.55865	N/A
myosin-light-chain kinase	1.30478	N/A	1.55865	N/A
mir-663	1.30478	N/A	1.55865	N/A
GABRG2	1.30478	N/A	1.55865	N/A
TMEM8B	1.30478	N/A	1.55865	N/A
MCF2L	1.30478	N/A	1.55865	N/A
ARMCX3	1.30478	N/A	1.55865	N/A
enalapril	1.38448	N/A	1.44703	N/A
clotrimazole	1.4542	N/A	N/A	1.345

## Sheet: IPA_tox_list
Tox list	All	Hyper	Hypo	CNE	-LOG(Pvalues)
TGF-β Signaling	3.09	1.98	1.92	3.26
Increases Cardiac Proliferation	2.77	1.5	1.46	0.748
Cardiac Hypertrophy	2.38	0.729	2.17	0.569
Persistent Renal Ischemia-Reperfusion Injury (Mouse)	2.06	2.02	1.12
Cell Cycle: G1/S Checkpoint Regulation	2.03	1.14	1.74	0.617
Hypoxia-Inducible Factor Signaling	1.91		2.37	0.595
Renal Necrosis/Cell Death	1.86	2.83	0.604
Liver Proliferation	1.62	1.29	0.868	0.608
Cardiac Necrosis/Cell Death	1.45	1.33	0.924
Liver Necrosis/Cell Death	1.27	0.882	0.826	0.472
Recovery from Ischemic Acute Renal Failure (Rat)	1.26	0.728	0.714
Increases Liver Hyperplasia/Hyperproliferation	1.18	0.706	1.13	2.02
Renal Glomerulus Panel (Human)	1.11		1.57
Decreases Transmembrane Potential of Mitochondria and Mitochondrial Membrane	0.963	1.51	0.965	0.406
PPARα/RXRα Activation	0.902	0.56	1.23	0.274
Aryl Hydrocarbon Receptor Signaling	0.822	0.679	1.01	0.841
Renal Inorganic Phosphate Homeostasis (Mouse)	0.814	1.07
Renal Proximal Tubule Toxicity Biomarker Panel (Rat)	0.774	1.23	0.47
Increases Renal Proliferation	0.748	0.836		0.357
Increases Liver Steatosis	0.621	0.412	0.394	0.499
Acute Renal Failure Panel (Rat)	0.618	1.2	0.212
Cytochrome P450 Panel - Substrate is a Fatty Acid (Human)	0.615	0.862
Cytochrome P450 Panel - Substrate is a Fatty Acid (Rat)	0.579	0.823
Primary Glomerulonephritis Biomarker Panel (Human)	0.579	0.823
Hepatic Fibrosis	0.523	0.731
Irreversible Glomerulonephritis Biomarker Panel (Rat)	0.518	0.757
Pro-Apoptosis	0.494	0.334	0.874
Swelling of Mitochondria	0.467	0.701
Cholesterol Biosynthesis	0.445		0.662
Cytochrome P450 Panel - Substrate is a Fatty Acid (Mouse)	0.445	0.676
Long-term Renal Injury Anti-oxidative Response Panel (Rat)	0.405	0.631
TR/RXR Activation	0.384	0.449		0.523
RAR Activation	0.376	0.275	0.256	0.26
Increases Glomerular Injury	0.362	0.43
Increases Heart Failure	0.326	0.54	0.527	1.04
Mechanism of Gene Regulation by Peroxisome Proliferators via PPARα	0.314	0.39	0.371
Decreases Depolarization of Mitochondria and Mitochondrial Membrane	0.289	0.496
Reversible Glomerulonephritis Biomarker Panel (Rat)	0.277		0.47
CAR/RXR Activation	0.257		0.445
Positive Acute Phase Response Proteins	0.247	0.445
Cardiac Fibrosis		0.267
Cell Cycle: G2/M DNA Damage Checkpoint Regulation		0.27
FXR/RXR Activation		0.256
Increases Transmembrane Potential of Mitochondria and Mitochondrial Membrane		0.281
LXR/RXR Activation		0.266
Mitochondrial Dysfunction		0.319		0.282
NF-κB Signaling		0.467
NRF2-mediated Oxidative Stress Response		0.888
Oxidative Stress		0.244
VDR/RXR Activation		0.498
Xenobiotic Metabolism Signaling		0.255

## Sheet: IPA_disease_and_biofunctions
Diseases and Bio Functions	All	Hyper	Hypo	CNE	-LOG(Pvalues)
organismal death	21.3035	14.6068	9.50818	8.83194
morphology of nervous system	21.3733	12.6281	10.3894	9.27388
development of neurons	20.4064	15.3843	9.16743	6.19535
proliferation of cells	22.0427	14.0121	10.3858	4.55813
cell death	19.7457	14.0236	10.0921	3.50013
differentiation of cells	19.8692	14.8624	6.94455	4.5875
necrosis	18.6348	15.0177	8.48573	3.35879
morphology of head	17.2736	10.8749	8.35931	8.89347
apoptosis	19.0508	14.6022	8.50459	2.99824
abnormal morphology of nervous system	17.3922	9.62671	9.13834	8.42744
generation of cells	15.9668	12.0458	9.16124	5.01701
abnormal morphology of head	16.027	10.0305	8.05336	7.75853
development of body axis	16.1335	9.13276	8.5721	7.04079
quantity of cells	15.6939	12.4804	6.94709	5.71904
development of head	15.8704	8.84363	8.76804	6.91779
perinatal death	16.2389	5.8648	11.4709	6.17907
development of body trunk	14.4499	8.5603	7.5763	8.51512
neonatal death	15.8766	7.24216	9.9449	5.49508
expression of RNA	14.7161	8.8494	8.39562	5.39734
morphology of cells	15.1362	10.4166	7.40493	3.91011
morphology of central nervous system	13.4872	8.29122	6.83898	7.81043
transcription of RNA	12.9538	8.77219	6.66223	6.49353
Hypoplasia	12.2713	10.3621	5.53388	6.29164
transcription of DNA	12.2338	7.35726	7.49853	7.11635
quantity of neurons	13.5521	8.22643	7.3007	4.88898
activation of DNA endogenous promoter	11.135	7.6953	6.0206	8.75622
development of central nervous system	12.8983	6.76508	7.36773	6.32328
hypoplasia of organ	11.306	9.42505	5.64762	6.19
morphology of brain	12.0848	7.66579	5.72856	6.74293
digestive organ tumor	11.4711	7.82672	6.00918	6.03757
neoplasia of epithelial tissue	11.8504	9.084	4.76302	5.56414
abnormal morphology of embryonic tissue	10.8108	5.13152	6.76999	8.27802
development of sensory organ	11.1622	10.0755	3.73682	5.65128
Gastrointestinal Tract Cancer and Tumors	12.333	9.85146	5.56789	2.83491
digestive system cancer	11.4069	7.32882	6.16497	5.66259
abdominal neoplasm	10.9486	7.82115	5.39711	6.3367
abnormal morphology of central nervous system	11.8761	6.69161	5.86468	5.70467
gastrointestinal tract cancer	11.9119	8.95647	5.6619	2.64071
abdominal cancer	10.5823	6.94085	5.56317	5.87847
formation of cellular protrusions	11.7194	7.4868	6.60265	3.14261
neuritogenesis	11.7316	8.55026	5.22248	3.29763
morphogenesis of embryo	8.46776	6.3608	5.49164	8.43118
abnormal morphology of neurons	11.0093	5.28849	7.85842	4.36145
dysgenesis	12.5553	10.0796	5.87622	0
malignant solid tumor	11.7794	6.6253	6.50741	3.56427
cancer	11.5138	6.82047	6.27089	3.777
morphology of body cavity	9.42334	6.32038	5.84131	6.4068
abnormal morphology of brain	11.1974	6.96133	5.09248	4.5906
size of body	10.6138	6.77809	6.3624	4.08042
morphology of nervous tissue	12.447	6.44953	8.35959	0
epithelial cancer	10.31	7.22241	4.5785	5.09541
transcription	12.459	8.50195	6.12048	0
morphogenesis of embryonic tissue	8.47336	4.56816	7.58485	6.43041
morphology of neurons	12.4203	6.18017	8.09399	0
microtubule dynamics	10.5294	6.75598	5.89746	3.32654
large intestine neoplasm	9.8386	8.60552	4.60462	3.03787
organization of cytoplasm	10.5817	6.3069	6.44263	2.47095
formation of brain	9.04357	4.77962	4.97633	6.2364
organization of cytoskeleton	11.4069	6.64889	6.83255	0
differentiation of nervous system	9.44205	7.01955	4.27222	4.13129
malignant neoplasm of large intestine	9.49701	7.94869	4.57922	2.79526
innervation	11.134	9.81501	3.84635	0
adenocarcinoma	9.43819	5.79497	5.63473	3.92226
abnormal morphology of body cavity	8.74486	5.82543	5.7349	4.4215
innervation of neurons	9.18637	7.87894	3.23455	4.33465
axonogenesis	9.3605	6.92896	4.12223	3.85348
abnormal morphology of cells	8.3987	4.87665	5.78904	4.46957
innervation of tissue	10.0259	9.573	3.29694	0
quantity of nervous tissue	14.0297	8.77578	0	0
size of head	7.49087	8.1704	0	7.00484
behavior	9.16707	6.86198	4.20961	2.34688
cell death of tumor cell lines	9.47283	7.90108	4.63306	0
abnormal morphology of bone	7.48596	3.20509	5.2859	5.47104
formation of eye	7.3596	5.99493	3.37311	4.65382
abnormal morphology of cranial nerve	8.61581	6.50717	3.02302	3.05461
quantity of sensory neurons	8.646	5.72191	2.94612	3.51721
apoptosis of neurons	8.49507	8.41536	3.88592	0
abnormal morphology of skull	7.28906	3.33831	4.97549	4.90511
Movement Disorders	8.90916	8.99673	2.48531	0
autosomal dominant disease	8.62174	5.97891	5.20644	0
development of abdomen	7.36844	3.71955	5.13066	3.45082
liver cancer	5.60193	6.02189	2.38856	5.26464
growth of embryonic tissue	7.46821	3.9542	4.33082	3.35011
size of brain	6.45594	6.77018	0	5.8515
abnormal morphology of telencephalon	7.03326	3.83641	4.35278	3.78863
migration of cells	8.07628	4.38323	3.9057	2.46626
abnormal morphology of forebrain	6.88083	3.42995	4.46366	4.04938
cell movement	8.14679	4.72569	3.70523	2.22993
cell proliferation of tumor cell lines	8.8826	5.41881	4.34026	0
abnormal morphology of ear	7.24448	3.62464	3.50261	4.07495
abnormal morphology of eye	6.17986	5.33544	3.44517	3.45532
neurotransmission	8.94693	5.07231	4.34324	0
formation of cerebellum	6.6592	4.44774	3.59504	3.56275
abnormal morphology of urinary system	6.50419	2.7358	5.35584	3.55711
abnormal morphology of abdomen	6.19455	3.68702	4.76952	3.35156
apoptosis of tumor cell lines	7.76437	5.43869	4.67854	0
morphology of kidney	6.78912	0	6.20192	4.50867
proliferation of neuronal cells	6.82291	7.41387	0	3.03644
hepatobiliary system cancer	5.4969	6.05669	0	5.59376
neuronal cell death	7.09508	5.77888	4.21891	0
commitment of cells	6.3661	4.59328	3.75625	2.34247
morphology of nerves	8.16593	5.57848	3.26311	0
formation of dendrites	7.03614	3.5247	4.0548	2.18864
developmental process of synapse	6.65909	5.13827	2.66736	2.33667
abnormal morphology of artery	6.16698	4.46965	3.64765	2.29533
cell survival	7.4298	4.78285	4.35723	0
growth of organism	6.31997	4.49334	3.17852	2.56233
morphogenesis of head	5.29339	3.68576	3.0183	4.34519
growth of embryo	6.08312	3.76973	2.77796	3.53345
feeding	5.30341	2.8807	4.19865	3.77805
abnormal morphology of middle ear ossicle	5.14508	0	4.66468	6.29387
differentiation of neurons	6.3665	5.50046	0	4.19782
development of inner ear	7.59519	6.01564	2.43184	0
formation of sarcomere	3.9885	3.45782	3.41287	5.08321
development of ophthalmic vesicle	4.44658	3.77933	0	7.7082
development of genitourinary system	5.92941	2.92214	4.24374	2.77465
size of mesencephalon	3.34826	2.99484	2.95057	6.56117
cell viability	6.98786	4.93427	3.91394	0
ventricular septal defect	4.95689	2.89637	2.80863	5.14953
cardiogenesis	4.76756	3.06277	3.24603	4.70359
abnormal morphology of rhombencephalon	6.0896	4.42152	2.97139	2.27694
guidance of axons	7.77427	5.6703	2.24865	0
abnormal morphology of commissure	5.33052	3.27738	3.21977	3.76841
formation of rhombencephalon	7.28712	0	4.18955	4.08893
tumorigenesis of tissue	10.9771	0	4.58108	0
liver lesion	6.08582	6.77142	2.51773	0
upper gastrointestinal tract tumor	7.32844	4.80102	3.07831	0
abnormal morphology of fornix	5.21366	0	4.79767	4.94622
synaptic transmission	7.00407	3.44539	4.25801	0
development of central nervous system cells	5.36605	3.88312	2.32861	3.05461
abdominal adenocarcinoma	4.74009	3.53029	2.97218	3.32199
upper gastrointestinal tract cancer	7.10564	4.44233	3.00919	0
abnormal morphology of branchial arch artery	4.88121	3.03423	2.97735	3.5801
multiple congenital anomalies	6.94974	4.82512	2.60275	0
abnormal morphology of blood vessel	5.17488	4.16513	2.95507	1.99259
formation of ventricular septum	4.94954	2.938	2.85966	3.45363
development of ear	6.58908	5.63229	0	1.96238
formation of forebrain	5.77146	0	3.81216	4.54047
assembly of intercellular junctions	6.47671	4.57934	2.83301	0
abnormal morphology of stapes	4.14609	0	5.37653	4.33908
abdominal carcinoma	4.39888	3.38904	2.67287	3.39472
abnormal morphology of pretectum	4.09592	2.89809	2.86767	3.98797
morphology of cardiovascular system	4.13695	4.523	0	5.16913
abnormal morphology of plasma membrane	6.07571	4.22857	3.48327	0
midline defect	4.94629	2.97069	2.37543	3.38195
tumorigenesis of reproductive tract	4.20055	3.36859	2.26024	3.82014
female genital neoplasm	4.17724	3.35354	2.24813	3.81138
differentiation of connective tissue	5.88945	4.96946	2.58195	0
morphology of urinary system	7.13593	0	6.28945	0
formation of plasma membrane	6.2418	4.4358	2.72789	0
transactivation of RNA	4.19359	3.09958	2.90049	3.14724
development of digestive system	5.81418	4.99456	2.51213	0
tumorigenesis of genital organ	4.58638	3.50065	2.32249	2.82873
abnormal morphology of kidney	5.60719	0	4.6306	2.97779
genital tumor	4.5723	3.49182	2.31541	2.82453
formation of cochlea	5.9801	4.61871	2.506	0
morphology of bone	7.55292	0	5.54014	0
hypoplasia of thorax	4.094	2.91662	3.37307	2.70917
morphology of atrioventricular canal	4.20083	0	3.56286	5.2368
differentiation of epithelial tissue	6.13484	2.60197	4.25732	0
morphogenesis of neurons	7.09306	5.81626	0	0
abnormal morphology of trigeminal nerve	5.58871	0	3.35765	3.87455
Growth Failure	5.10916	4.75454	2.95145	0
morphology of eye	6.61492	6.14298	0	0
differentiation of muscle cells	5.44398	4.25262	3.05685	0
abnormal morphology of limb	3.68837	2.60888	2.49174	3.83378
Schizophrenia	5.54737	7.05354	0	0
gastrointestinal carcinoma	5.18007	4.83561	2.56077	0
schizophrenia spectrum disorder	5.39257	7.11362	0	0
development of metencephalon	7.30296	5.17094	0	0
morphology of thalamus	3.6144	0	3.87941	4.97596
heart rate	5.72631	4.4358	2.28223	0
seizure disorder	5.29899	4.21513	2.78604	0
cell transformation	5.61191	4.22139	2.40288	0
breast or ovarian cancer	3.65776	2.68835	2.75937	3.11897
differentiation of neuroglia	5.52732	3.09221	3.57015	0
cell cycle progression	5.59389	3.13809	3.42438	0
morphology of retinal cells	3.84072	3.03789	2.26753	3.00763
lack of efferent ductule of testis	4.68901	0	3.16431	4.28782
growth of connective tissue	5.92662	3.73182	2.47885	0
sensory system development	6.99967	5.11363	0	0
abnormal morphology of cardiovascular system	3.77446	3.98581	0	4.24582
formation of kidney	4.60243	0	4.14634	3.25732
stenosis of outflow tract	3.70694	4.51326	0	3.7673
morphology of ear	7.73048	4.19144	0	0
neoplasia of cells	4.3091	2.60842	2.55807	2.41004
interphase of breast cancer cell lines	5.10398	4.20038	2.55011	0
morphogenesis of neurites	6.39731	5.4308	0	0
cancer of secretory structure	4.40845	2.96037	2.30284	2.1379
expansion of motor neurons	3.41485	0	2.4785	5.85611
morphogenesis of ophthalmic vesicle	3.41485	0	2.4785	5.85611
size of pallium	3.41485	0	2.4785	5.85611
degeneration of floor plate	3.41485	0	2.4785	5.85611
generation of v3 neuron	3.41485	0	2.4785	5.85611
development of metanephros	4.77327	0	3.86859	3.10315
abnormal morphology of middle ear	6.43219	0	5.24609	0
transformation of fibroblast cell lines	4.38771	3.72937	0	3.53122
abnormal morphology of malleus	3.77678	0	3.6779	4.11862
lack of kidney	4.41386	0	3.75418	3.37926
abnormal morphology of cranium	4.61118	0	2.58174	4.32586
abnormal morphology of hippocampal commissure	4.44658	0	3.73403	3.32369
abnormal morphology of diencephalon	4.28058	0	4.02709	3.18774
abnormal morphology of retina	3.90128	3.12555	2.4528	2.01338
abnormal morphology of tectum mesencephali	4.28749	0	2.77328	4.42208
growth of axons	5.31434	3.93649	0	2.09006
angiogenesis	4.89034	3.94464	2.4671	0
cancer of cells	4.22105	2.67515	2.31378	2.0496
differentiation of retinal cells	4.88121	4.15711	0	2.15824
size of embryo	3.64066	3.51562	0	4.02918
hydrops fetalis	3.34226	0	4.93928	2.89748
uptake of monosaccharide	4.3909	2.92261	3.78602	0
benign neoplasia	5.85405	5.21577	0	0
migration of neurons	3.77862	0	2.7543	4.52983
edema of subcutaneous tissue	4.68901	3.19488	3.16431	0
morphogenesis of muscle	3.9843	2.93565	0	4.11687
differentiation of osteoblasts	4.74968	3.35738	2.72789	0
development of endocrine gland	4.46723	0	2.83976	3.505
suckling	4.79401	0	3.56478	2.29447
G1/S phase transition of breast cancer cell lines	4.67474	3.56773	2.36322	0
development of metanephric bud	4.74376	0	3.5326	2.27998
invasion of cells	4.94954	5.5139	0	0
respiratory system development	4.79079	0	3.57053	2.07678
degeneration of embryonic tissue	3.2056	0	2.5466	4.68105
benign breast disease	4.18762	3.14488	3.04565	0
development of outflow tract	4.59756	3.53122	0	2.2376
metabolism of carbohydrate	4.32338	3.62926	2.38472	0
differentiation of bone cells	4.42957	3.64435	2.25425	0
transactivation	3.91234	0	2.87967	3.52335
failure of lactation	4.0958	0	2.80421	3.41267
quantity of brain cells	4.05279	0	3.64282	2.60653
morphogenesis of heart	3.73394	0	2.66447	3.90111
gastroesophageal cancer	4.8851	2.98857	2.42388	0
size of bone	4.96287	2.7277	2.5943	0
abnormal morphology of neurites	4.20369	3.70736	2.36877	0
familial heart disease	3.72784	0	2.89564	3.64753
locomotion	4.53499	5.68177	0	0
cell proliferation of breast cancer cell lines	4.43098	2.75951	2.97662	0
proliferation of neuroblastoma cell lines	4.86457	0	3.15269	2.10722
lack of epididymis	3.70694	0	2.65021	3.7673
oral cancer	5.79736	4.32138	0	0
morphology of rhombencephalon	6.56041	0	3.50261	0
abnormal morphology of jaw	3.95437	0	3.02302	3.05461
expression of protein	3.66404	0	6.3475	0
differentiation of connective tissue cells	5.12811	4.87145	0	0
morphology of retina	5.18827	4.7897	0	0
growth of tumor	4.63219	2.77977	2.55268	0
innervation of axons	6.10035	3.77933	0	0
entry into cell cycle progression of fibroblast cell lines	4.09592	2.89809	2.86767	0
abnormal morphology of sensory neurons	4.02008	0	3.23232	2.53824
loss of neurons	3.86541	2.85046	0	3.02306
pelvic cancer	3.64624	2.65014	0	3.43573
proliferation of epithelial cells	5.52929	4.11216	0	0
abnormal morphology of cochlea	5.81402	3.79236	0	0
abnormal morphology of striatum	4.59027	2.87513	0	2.07762
cell death of lymphoblastoid cell lines	3.95437	5.58477	0	0
colony formation of cells	5.03445	4.485	0	0
morphology of blood vessel	5.1385	4.37373	0	0
abnormal morphology of mesenchyme	4.28594	0	2.5691	2.6328
abnormal morphology of styloid process of temporal bone	3.41485	0	2.4785	3.59239
oral tumor	5.17599	4.30295	0	0
hypoplasia of myocardium	3.48491	3.09484	0	2.88465
vision	5.10664	4.34087	0	0
development of connective tissue	3.84292	3.07078	2.50933	0
developmental delay of kidney	3.48491	0	3.05041	2.88465
morphology of vessel	4.90186	4.43288	0	0
head and neck neoplasia	4.96635	4.28552	0	0
genital tract cancer	3.56133	2.85345	0	2.82742
morphogenesis of ventricular septum	3.94169	3.09137	0	2.18703
proliferation of connective tissue cells	5.19194	3.97709	0	0
G1 phase of breast cancer cell lines	3.62608	3.25726	2.28512	0
abnormal morphology of respiratory system	3.98647	0	2.7483	2.33134
growth of ear	3.9885	5.04927	0	0
myelination	3.73358	2.69651	2.58553	0
abnormal morphology of cardiac valve	3.65596	0	2.66263	2.69352
abnormal morphology of small trigeminal ganglion	4.60654	4.39124	0	0
abnormal morphology of second branchial arch	3.89187	0	2.54979	2.55082
developmental delay	3.2351	0	3.19832	2.52023
urogenital cancer	3.70062	2.83495	0	2.41295
morphogenesis of skeletal system	4.355	4.51852	0	0
growth of plasma membrane projections	3.96441	4.77193	0	0
quantity of central nervous system cells	4.355	0	4.37899	0
size of animal	4.35605	4.3301	0	0
morphology of inner ear	5.27246	3.39835	0	0
abnormal morphology of metencephalon	4.6445	4.0182	0	0
abnormal morphology of inferior ganglion of vagus nerve	3.80171	4.85802	0	0
branching of neurites	4.13218	4.52202	0	0
cell movement of tumor cell lines	4.5063	4.11875	0	0
formation of muscle	3.2165	0	2.39226	2.95959
morphology of reproductive system	3.67673	2.81771	0	2.0707
intercellular communication	4.81862	0	3.74031	0
synthesis of protein	3.31891	0	5.16893	0
abnormal morphology of cerebral cortex	3.54012	0	2.24815	2.6914
import of metal ion	4.8029	3.64986	0	0
action potential of cells	4.75894	3.68644	0	0
morphogenesis of outflow tract	4.36222	0	4.07223	0
cell viability of tumor cell lines	4.54106	3.8902	0	0
autosomal recessive disease	4.95066	3.47557	0	0
enzyme linked receptor protein signaling pathway	4.28058	4.13367	0	0
development of cerebral cortex	3.3399	2.85046	0	2.16328
branching of cells	3.99222	4.35681	0	0
abnormal morphology of vestibulocochlear nerve	4.03226	4.30804	0	0
coordination	4.2357	4.084	0	0
neoplasia of epithelial cells	3.41205	0	2.38394	2.49825
contact growth inhibition of leukocytes	3.63512	0	4.62681	0
length of embryo	4.44658	0	3.73403	0
proliferation of hematopoietic cells	4.2001	0	3.97871	0
abnormal morphology of trigeminal ganglion	3.94169	4.23107	0	0
abnormal morphology of adenohypophysis	3.46977	0	2.30739	2.3854
dystonia	3.96991	4.16735	0	0
mammary tumor	3.24699	2.61212	2.25668	0
abnormal morphology of cranial nerve ganglion	4.33026	3.76589	0	0
growth of neurites	3.70378	4.37453	0	0
sprouting	4.00381	4.0726	0	0
abnormal morphology of branchial arch	3.19276	0	2.37045	2.50251
epilepsy	3.49948	4.52774	0	0
cellular homeostasis	4.5164	3.47811	0	0
quantity of connective tissue	4.08175	3.90683	0	0
abnormal morphology of mesencephalon	4.64865	0	3.27826	0
Organ Degeneration	4.05193	3.85607	0	0
abnormal morphology of temporal bone	4.12333	0	0	3.77568
proliferation of hematopoietic progenitor cells	4.15376	0	3.73525	0
size of zone of hypertrophy	4.68901	3.19488	0	0
Axenfeld-Rieger syndrome	4.68901	3.19488	0	0
phosphorylation of protein	4.25848	0	3.58897	0
formation of lung	4.55054	0	3.29319	0
epithelial-mesenchymal transition	3.72682	4.06637	0	0
cytostasis	4.54077	3.2305	0	0
abnormal morphology of petrosal ganglion	3.34826	4.39124	0	0
quantity of neuroendocrine cells	3.95437	0	3.77813	0
morphogenesis of ear	4.15828	3.54929	0	0
abnormal morphology of cerebellum	4.23437	3.45867	0	0
innervation of sensory neurons	4.23066	3.45601	0	0
seizures	4.55893	0	3.10596	0
formation of embryonic tissue	4.26406	0	3.39335	0
invasion of tissue	4.28651	3.28421	0	0
hypoplasia of embryonic tissue	3.94169	0	0	3.62455
morphology of second branchial arch	4.22591	0	3.21977	0
hypoplasia of iris	0	3.9787	0	3.44745
mesoderm development	3.36334	0	4.06035	0
outgrowth of neurites	3.31951	4.09551	0	0
quantity of interneurons	4.59027	0	2.81879	0
neurodevelopmental disorder	3.87696	3.53122	0	0
morphology of cellular protrusions	3.62134	3.75852	0	0
central nervous system tumor	3.51078	3.85708	0	0
contraction of cardiac muscle	4.39058	2.96589	0	0
stomach tumor	4.21755	3.13572	0	0
quantity of motor neurons	4.02008	3.31296	0	0
quantity of mechanosensory neurons	4.50047	2.82577	0	0
extension of neurites	3.48606	3.8168	0	0
synthesis of carbohydrate	3.5655	3.73408	0	0
apoptosis of breast cancer cell lines	3.8538	0	3.4061	0
morphology of cerebellum	4.6445	0	2.59912	0
arrest in proliferation of cells	3.74847	3.49274	0	0
outgrowth of axons	4.31126	2.91928	0	0
quantity of endocrine cells	3.49031	0	3.66705	0
morphology of respiratory system	4.30142	2.82652	0	0
abnormal morphology of pupil	0	3.77933	0	3.32369
migration of tumor cell lines	3.98288	3.11558	0	0
morphogenesis of metanephric bud	3.92066	0	3.1649	0
development of mesonephros	4.73808	0	2.33675	0
action potential of neurons	3.62148	3.43713	0	0
congenital heart disease	4.2122	0	2.80152	0
quantity of catecholamine	3.21918	3.79268	0	0
oral cavity carcinoma	4.28651	2.72466	0	0
differentiation of epithelial cells	3.43001	0	3.58053	0
hypoplasia of heart	3.82483	3.17964	0	0
abnormal morphology of locus ceruleus	4.09592	2.89809	0	0
quantity of lymphatic endothelial cells	4.09592	2.89809	0	0
development of atrium	3.20811	0	0	3.76841
growth of epithelial tissue	4.29162	2.68265	0	0
cartilage development	3.86899	0	3.10302	0
delay in interphase of breast cancer cell lines	4.09592	0	2.86767	0
cognition	3.65262	3.29318	0	0
function of cardiovascular system	3.36035	0	3.58231	0
development of vasculature	3.85729	3.08017	0	0
neurocristopathy syndrome	3.7782	3.1477	0	0
muscle contraction	4.19601	0	2.72952	0
development of mesenchyme	3.68751	0	3.23249	0
development of branchial arch	3.46977	0	3.43163	0
abnormal morphology of cochlear duct	4.57409	0	2.31949	0
differentiation of tumor cell lines	4.19561	2.69099	0	0
branching of axons	3.27662	3.5937	0	0
lack of testis	0	0	2.86767	3.98797
development of lacrimal gland	3.63512	3.20405	0	0
development of gastrointestinal tract	3.73593	3.06951	0	0
migration of melanoma cells	3.37814	3.41562	0	0
autosomal dominant myopathy	3.5221	3.27028	0	0
gastrointestinal adenocarcinoma	3.45563	3.30851	0	0
function of neurons	4.01238	2.74304	0	0
morphogenesis of brain	0	3.1477	0	3.60629
morphology of atrioventricular valve	3.77155	2.97924	0	0
hypoplasia of heart chamber	3.86992	2.86399	0	0
vasculogenesis	3.75958	2.97184	0	0
function of cardiac muscle	3.23452	0	3.47881	0
formation of vertebrae	3.5663	0	3.14442	0
development of craniofacial tissue	3.5663	0	3.14442	0
specification of cells	4.17647	0	2.5097	0
hemangioma	3.21502	3.47053	0	0
congenital malformation of genitourinary system	3.56973	0	3.10946	0
female genital tract cancer	3.19717	0	0	3.46943
gastric cancer	3.92864	2.73658	0	0
pelvic tumor	3.93747	2.72504	0	0
development of epithelial tissue	4.23422	0	2.42202	0
migration of Schwann cells	3.29105	3.34492	0	0
learning	3.67419	2.9603	0	0
hearing	3.59311	3.02413	0	0
abnormal morphology of lateral cerebral ventricle	0	0	2.66263	3.93708
import of K+	3.48491	3.09484	0	0
morphology of digestive system	3.87368	0	2.66311	0
quantity of somatotrophs	3.48491	0	3.05041	0
formation of cochlear duct	3.48491	0	3.05041	0
quantity of nucleus	3.39614	3.08888	0	0
expansion of hematopoietic progenitor cells	3.55691	0	2.91685	0
formation of brain cells	3.70772	2.76201	0	0
skin tumor	4.13638	0	2.3195	0
guidance of motor axons	3.20811	0	3.21977	0
degeneration of cells	3.73367	2.68668	0	0
abnormal morphology of thalamus	0	0	2.86973	3.49576
morphogenesis of inner ear	3.71349	2.65018	0	0
foliation of cerebellum	0	0	3.27826	3.08491
congenital malformation of brain	3.51094	2.84806	0	0
advanced stage myelofibrosis with myeloid metaplasia	3.70694	0	2.65021	0
development of mullerian duct	3.70694	0	2.65021	0
growth of nerves	3.70694	0	2.65021	0
cell viability of breast cancer cell lines	3.90128	0	2.4528	0
GABA-mediated receptor currents	3.34826	2.99484	0	0
development of ganglion cells	3.34826	2.99484	0	0
development of reproductive system	3.83956	0	2.49299	0
size of forebrain	3.6053	2.69741	0	0
abnormal morphology of dorsal aorta	3.2897	3.01053	0	0
abnormal morphology of photoreceptor outer segments	3.2897	3.01053	0	0
abnormal morphology of metanephros	3.34826	0	2.95057	0
skin lesion	3.96534	0	2.29328	0
morphogenesis of forebrain	0	2.82577	0	3.41687
uterine tumor	0	2.89701	0	3.29293
quantity of hematopoietic progenitor cells	3.62851	0	2.54427	0
recruitment of protein	3.23842	0	2.90461	0
development of anlage	3.39945	2.73189	0	0
abnormal morphology of vestibular ganglion	3.22303	2.90265	0	0
abnormal morphology of clavicle	0	0	3.15945	2.95602
morphology of mullerian duct	0	0	3.15945	2.95602
familial cardiovascular disease	3.34081	0	2.7543	0
quantity of colony forming multilineage cells	3.22303	0	2.85856	0
density of synapse	3.39945	0	2.67609	0
lack of ovary	0	0	2.4785	3.59239
development of trigeminal nerve	0	0	2.4785	3.59239
abnormal morphology of cerebellar cortex	3.31475	0	2.7504	0
abnormal morphology of small kidney	3.4595	2.60513	0	0
hypoplasia of heart ventricle	3.18835	0	2.86778	0
abnormal morphology of olfactory bulb	3.18835	0	0	2.82546
differentiation of carcinoma cell lines	0	0	3.3746	2.61325
abnormal morphology of digestive system	3.37806	0	2.58964	0
morphogenesis of face	3.33267	0	2.63157	0
specification of body axis	3.41284	0	2.5097	0
atrial septal defect	0	0	0	5.91751
apoptosis of pre-B lymphocytes	0	2.97924	2.92254	0
localization of neurons	3.41485	0	2.4785	0
double aortic arch	3.41485	0	2.4785	0
length of embryonic tissue	3.41485	0	2.4785	0
quantity of retinal cells	3.27826	0	0	2.53824
abnormal morphology of anterior chamber of eye	0	2.99484	0	2.81888
innervation of motor neurons	0	2.99484	0	2.81888
proliferation of tumor cells	3.51179	0	2.27625	0
quantity of dermal cells	3.46977	0	2.30739	0
lack of middle ear ossicle	0	0	2.95057	2.81888
formation of megakaryocyte/erythrocyte lineage-restricted progenitor cells	0	0	3.63703	2.07925
abnormal morphology of gonad rudiment	0	0	3.63703	2.07925
pancreatic mass	3.35307	0	2.33185	0
abnormal morphology of synapse	3.2351	0	2.3973	0
loss of dopaminergic neurons	3.29105	0	0	2.31374
quantity of blood	3.30433	0	2.26295	0
immortalization	3.19276	0	2.37045	0
abnormal morphology of photoreceptors	0	3.08537	0	2.41785
abnormal morphology of metanephric mesenchyme	0	0	2.77328	2.7011
edema of connective tissue	0	0	2.72818	2.73586
morphology of lymphatic system cells	0	0	3.29095	2.17044
abnormal morphology of corpus callosum	0	0	2.35477	3.08491
abnormal morphology of thoracic cavity	0	3.00816	0	2.33645
quantity of amacrine cells	0	2.66313	0	2.59794
development of stem cells	0	0	3.12609	2.09501
abnormal turning of embryo	0	2.82798	0	2.27998
abnormal morphology of nose	0	0	0	5.05092
nephronophthisis	0	0	2.48409	2.50624
elongation of embryonic tissue	0	0	2.48409	2.50624
development of urinary tract	4.89864	0	0	0
differentiation of cardiomyocytes	0	0	2.37045	2.50251
abnormal morphology of inner ear	4.87187	0	0	0
commitment of neurons	0	2.73189	0	2.00442
abnormal morphology of vein	0	2.73189	0	2.00442
shape change of neurons	4.64226	0	0	0
colony formation	4.41462	0	0	0
respiratory failure	4.40082	0	0	0
shape change of neurites	4.37657	0	0	0
G1/S phase transition of tumor cell lines	0	0	2.32861	2.04753
branching of neurons	4.35766	0	0	0
morphogenesis of limb	0	0	0	4.35738
entry into S phase of hepatoma cell lines	0	0	0	4.28782
double outlet right ventricle	0	0	0	4.28392
abnormal morphology of olfactory epithelium	0	0	0	4.26121
abnormal morphology of external ear	0	0	0	4.26121
cell movement of breast cancer cell lines	4.20703	0	0	0
morphology of cardiac valve	4.17647	0	0	0
size of neurons	0	4.10096	0	0
cell movement of neurons	4.09121	0	0	0
metabolism of protein	0	0	4.06968	0
congenital anomaly of cardiovascular system	4.06824	0	0	0
breast or colorectal cancer	0	4.0681	0	0
translation of RNA	0	0	4.0612	0
abnormal morphology of facial nerve	4.03226	0	0	0
skin cancer	4.00815	0	0	0
size of eye	0	0	0	3.99062
loss of nodose ganglion neurons	0	3.9787	0	0
apoptosis of prostate cells	0	3.9787	0	0
proliferation of ear cells	0	3.9787	0	0
colorectal neoplasia	0	3.96013	0	0
formation of radial glial cells	0	0	3.93323	0
contact growth inhibition of lymphocytes	0	0	3.93323	0
disorder of basal ganglia	0	3.92735	0	0
survival of cerebellar cortex cells	0	3.92611	0	0
dorsal-ventral axis patterning	0	0	0	3.88142
walking	0	3.86558	0	0
expression of mRNA	0	0	3.82777	0
specification of neurons	0	0	0	3.82035
paired-pulse inhibition	0	3.77933	0	0
reflex	3.77261	0	0	0
abnormal morphology of sensory epithelium	3.77155	0	0	0
contraction of striated muscle	3.76873	0	0	0
limb development	0	0	0	3.76615
malignant neoplasm of aerodigestive tract	3.76042	0	0	0
Hypertrophy	3.75563	0	0	0
cell death of epithelial cell lines	0	3.7419	0	0
development of myeloid progenitor cells	0	0	3.73403	0
contact growth inhibition of hematopoietic progenitor cells	0	0	3.73403	0
neuromuscular disease	0	3.72058	0	0
abnormal morphology of mesonephric mesenchyme	0	3.66775	0	0
iris hypoplasia with glaucoma	0	3.66775	0	0
malignant T-cell non-Hodgkin lymphoma	0	3.66775	0	0
autosomal dominant glaucoma	0	3.66775	0	0
quantity of dopaminergic amacrine cells	0	3.66775	0	0
familial iridogoniodysgenesis syndrome	0	3.66775	0	0
development of palate	0	0	3.6625	0
initiation of translation of protein	0	0	3.65113	0
renal cyst	0	0	3.65113	0
color of urine	0	0	3.63703	0
density of blood vessel tissue	0	0	3.63703	0
outgrowth of ovarian cancer cell lines	0	0	3.63703	0
autosomal recessive hyperekplexia type 1	0	0	3.63703	0
common B-cell acute lymphoblastic leukemia	0	0	3.63703	0
extension of plasma membrane projections	3.63263	0	0	0
quantity of hair cells	3.6144	0	0	0
homeostasis of K+	0	3.60798	0	0
conotruncal heart malformations	3.59966	0	0	0
cell death of carcinoma cell lines	0	3.5945	0	0
movement of rodents	3.57748	0	0	0
extension of axons	0	3.57541	0	0
cell viability of sympathetic neuron	0	3.56773	0	0
apoptosis of leukemia cell lines	0	0	3.5634	0
differentiation of lung cancer cell lines	0	0	3.56286	0
tetralogy of Fallot	0	0	3.56286	0
morphology of heart	0	0	0	3.55747
cell proliferation of carcinoma cell lines	3.55746	0	0	0
inhibitory postsynaptic potential	0	3.54481	0	0
cell viability of neuroblastoma cell lines	0	3.53158	0	0
translation of protein	0	0	3.52937	0
shape change of axons	3.5221	0	0	0
translation of mRNA	0	0	3.51498	0
central nervous system cancer	0	3.51132	0	0
abnormal morphology of ventricular wall	0	0	3.49883	0
innervation of muscle	0	3.48978	0	0
morphology of heart ventricle	0	0	0	3.48379
outgrowth of cells	3.47279	0	0	0
development of neural crest	3.46977	0	0	0
differentiation of photoreceptors	3.46977	0	0	0
abnormal morphology of aorta	3.4595	0	0	0
re-entry into S phase of fibroblast cell lines	0	3.45782	0	0
interphase	3.45673	0	0	0
excitatory postsynaptic potential	3.43117	0	0	0
morphology of endocrine gland	0	0	3.42543	0
malignant cutaneous melanoma cancer	3.42416	0	0	0
gastro-esophageal carcinoma	3.41941	0	0	0
loss of motor neurons	0	3.41562	0	0
morphogenesis of viscerocranium	0	0	3.41287	0
development of colony-forming erythroid cells	0	0	3.41287	0
cell viability of motor neurons	0	3.39519	0	0
abnormal morphology of hippocampus	3.39483	0	0	0
morphology of photoreceptors	3.39286	0	0	0
invasion of tumor cell lines	0	3.38391	0	0
abnormal morphology of organ of Corti	3.37814	0	0	0
overriding aorta	3.37814	0	0	0
cell survival of tumor cell lines	3.3671	0	0	0
upper aerodigestive tract carcinoma	3.35633	0	0	0
quantity of monoamines	0	3.34953	0	0
abnormal morphology of small branchial arch	3.34826	0	0	0
extension of cellular protrusions	3.34624	0	0	0
abnormal morphology of subventricular zone	0	0	0	3.34278
melanoma	3.33663	0	0	0
proliferation of fibroblast cell lines	3.33082	0	0	0
kindling	0	3.32426	0	0
loss of spinal neuron	0	3.32426	0	0
abnormal morphology of lateral ganglionic eminences	0	0	0	3.32369
localization of phosphatidylserine	0	0	0	3.32369
abnormal morphology of atrioventricular canal	0	0	0	3.32369
organization of organelle	0	3.31512	0	0
S phase	3.3133	0	0	0
perimembranous ventricular septal defect	3.29105	0	0	0
differentiation of Schwann cells	0	0	3.28713	0
colorectal cancer	0	3.28458	0	0
cell death of epithelial cells	0	3.28396	0	0
lack of myeloid progenitor cells	0	0	3.27948	0
quantity of inner hair cells	0	0	3.27948	0
arrest in interphase of hematopoietic progenitor cells	0	0	3.27948	0
apoptosis of sensory neurons	0	3.27738	0	0
gliomatosis	0	3.24974	0	0
apoptosis of epithelial cell lines	0	3.23509	0	0
cell death of breast cancer cell lines	3.22667	0	0	0
aplasia or hypoplasia of eye	3.22303	0	0	0
morphogenesis of embryonic limb	0	0	0	3.22297
quantity of vesicles	0	3.21636	0	0
morphology of atrial septum	0	0	0	3.21573
quantity of neuroglia	3.21128	0	0	0
autosomal recessive cerebellar ataxia	3.20811	0	0	0
abnormal morphology of atrium	0	0	0	3.20525
abnormal morphology of corpora quadrigemina	0	3.20405	0	0
abnormal morphology of somatic nervous system	0	3.20405	0	0
pancreatic tumor	3.20382	0	0	0
aggregation of brain cancer cell lines	0	3.19488	0	0
abnormal morphology of small scapula	0	3.19488	0	0
abnormal morphology of macula of saccule	0	3.19488	0	0
damage of anterior tibial muscle	0	3.19488	0	0
delay in G1/S phase transition of breast cancer cell lines	0	3.19488	0	0
Charcot-Marie-Tooth disease type 2A	0	3.19488	0	0
sprouting of serotonergic neurons	0	3.19488	0	0
lack of spiral ganglion	0	3.19488	0	0
activation of cortical neurons	0	3.19488	0	0
quantity of enterocytes	0	3.19488	0	0
fusion of middle ear ossicle	0	3.19488	0	0
delay in initiation of differentiation of induced pluripotent stem cells	0	3.19488	0	0
sub-G1 phase of breast cancer cell lines	0	3.19488	0	0
excitatory postsynaptic potential of synapse	0	3.19488	0	0
tumorigenesis of basal epithelial prostate cells	0	3.19488	0	0
hepatocellular carcinoma	0	3.19187	0	0
formation of cardiac muscle	0	0	0	3.17043
size of lymphoma cell lines	0	0	3.16431	0
transformation of mammary gland	0	0	3.16431	0
autosomal recessive microcephaly and chorioretinopathy	0	0	3.16431	0
catabolism of glutamine	0	0	3.16431	0
remyelination of corpus callosum	0	0	3.16431	0
density of GABAergic synapse	0	0	3.16431	0
trisomy 8 myelodysplastic syndrome	0	0	3.16431	0
quantity of olfactory receptor neurons	0	0	3.16431	0
transformation of airway epithelial cells	0	0	3.16431	0
induction of renal vesicle	0	0	3.16431	0
Huntington's Disease	0	3.16207	0	0
cell death of cortical neurons	0	3.15935	0	0
abnormal morphology of vestibular organ	0	3.15082	0	0
mineralization of cells	0	3.1477	0	0
size of cells	0	3.14033	0	0
invasion of breast cancer cell lines	0	3.13317	0	0
development of hematopoietic cells	0	0	3.12957	0
cell death of kidney cells	0	3.12208	0	0
production of lactic acid	0	0	3.10202	0
synthesis of aldosterone	0	0	3.09358	0
differentiation of mechanosensory neurons	0	3.09137	0	0
morphogenesis of cardiac muscle	0	0	0	3.08491
proliferation of muscle cells	0	3.07129	0	0
abnormal morphology of heart septum	0	0	3.06802	0
initiation of translation of mRNA	0	0	3.06065	0
ataxia	0	3.05696	0	0
arrest in interphase of ovarian cancer cell lines	0	0	3.05041	0
arrest in differentiation of hematopoietic progenitor cells	0	0	3.05041	0
adenoma	0	3.04398	0	0
cell viability of neurons	0	3.03977	0	0
quantity of anterior pituitary cells	0	0	3.03431	0
development of jaw	0	0	0	3.03402
morphogenesis of atrioventricular valve	0	0	0	3.03402
septation of outflow tract	0	0	0	3.03402
cell viability of brain cells	0	3.01361	0	0
function of heart	0	0	3.00287	0
neurodegeneration of brain cells	0	2.99557	0	0
rotation behavior	0	2.99484	0	0
invasion of melanoma cells	0	2.99484	0	0
regression of hair follicle	0	2.99484	0	0
survival of Purkinje cells	0	2.99484	0	0
atrophy of muscle	0	2.98832	0	0
apoptosis of kidney cell lines	0	2.98652	0	0
loss of sensory neurons	0	2.97924	0	0
abnormal morphology of external acoustic meatus	0	0	0	2.95602
synthesis of rRNA	0	0	2.95057	0
cell death of embryonic cell lines	0	2.94729	0	0
secretion of neurotransmitter	0	2.93563	0	0
cell death of brain cells	0	2.93455	0	0
differentiation of germ cell tumor cell lines	0	0	0	2.92251
concentration of dopamine	0	2.91928	0	0
morphology of bone marrow cells	0	0	2.91685	0
cell death of kidney cell lines	0	2.90268	0	0
development of ureter	0	2.90265	0	0
development of thalamus	0	2.90265	0	0
nucleation of cervical cancer cell lines	0	2.90265	0	0
cytostasis of breast cell lines	0	2.90265	0	0
modification of octanoic acid	0	2.89809	0	0
initiation of generation of dermal fibroblasts	0	2.89809	0	0
onset of progressive motor neuropathy	0	2.89809	0	0
colony formation of neuroblastoma cell lines	0	2.89809	0	0
modification of glucose-6-phosphate	0	2.89809	0	0
arrest in cell cycle progression of B lymphocytes	0	2.89809	0	0
morphogenesis of diencephalon	0	2.89809	0	0
entry into mitosis of fibroblast cell lines	0	2.89809	0	0
transformation of mesothelial cells	0	2.89809	0	0
size of keratinocytes	0	2.89809	0	0
formation of horizontal semicircular canal	0	2.89809	0	0
lack of saccule	0	2.89809	0	0
quantity of dermal fibroblasts	0	2.89809	0	0
initiation of generation of induced pluripotent stem cells	0	2.89809	0	0
apoptosis of PrEC cells	0	2.89809	0	0
mild to moderate stage heart failure	0	2.89809	0	0
apoptosis of cerebral cortex cells	0	2.89637	0	0
abnormal morphology of olfactory receptor neurons	0	0	0	2.88465
cell movement of endothelial cells	0	0	2.87881	0
development of sensory neurons	0	2.87513	0	0
lack of mullerian duct	0	0	2.86767	0
lack of erythroid progenitor cells	0	0	2.86767	0
contact growth inhibition of pre-B lymphocytes	0	0	2.86767	0
fate determination of muscle cells	0	0	2.86767	0
development of trigeminal ganglion neurons	0	0	2.86767	0
arrest in G2/M phase transition of breast cancer cell lines	0	0	2.86767	0
arrest in interphase of erythroblasts	0	0	2.86767	0
formation of Muller glia	0	0	2.86767	0
atresia of tricuspid valve	0	0	2.86767	0
targeting of synaptic vesicles	0	0	2.86767	0
arrest in hematopoiesis	0	0	2.86767	0
proliferation of intestinal cells	0	2.86399	0	0
transmembrane receptor protein tyrosine kinase signaling pathway	0	2.86399	0	0
electrophysiology of retinal rods	0	2.86399	0	0
abnormal morphology of incus	0	0	2.85856	0
methylmalonic acidemia	0	0	2.85856	0
proliferation of embryonic cells	0	2.85803	0	0
development of spinal cord	0	0	0	2.84898
abnormal morphology of heart ventricle	0	0	0	2.83926
localization of cells	0	2.82929	0	0
aggregation of tumor cell lines	0	2.82929	0	0
survival of sensory neurons	0	2.82577	0	0
salivary gland cancer	0	2.82577	0	0
morphology of ovary	0	0	2.82022	0
abnormal morphology of nasal cavity	0	0	0	2.81888
abnormal morphology of dilated third cerebral ventricle	0	0	0	2.81888
autosomal dominant Charcot-Marie-Tooth disease type 2	0	2.8172	0	0
abnormal morphology of geniculate ganglion	0	2.8172	0	0
abnormal morphology of small dorsal root ganglion	0	2.8172	0	0
abnormal morphology of rod outer segments	0	2.8172	0	0
relaxation of muscle	0	2.80148	0	0
connective or soft tissue tumor	0	2.79715	0	0
advanced malignant tumor	0	2.78745	0	0
differentiation of muscle cell lines	0	2.78459	0	0
hypoactivity of mice	0	2.78459	0	0
gait disturbance	0	2.78405	0	0
development of striated muscle	0	0	0	2.78224
development of diencephalon	0	2.77806	0	0
glioblastoma cancer	0	2.77343	0	0
development of connective tissue cells	0	2.77184	0	0
quantity of breast cancer cell lines	0	0	2.76961	0
abnormal morphology of cerebral ventricles	0	0	2.76398	0
formation of lamellipodia	0	0	2.76209	0
abnormal shape of heart	0	0	0	2.75791
development of hematopoietic progenitor cells	0	0	2.74694	0
abnormal morphology of reproductive system	0	2.74573	0	0
expansion of neurons	0	2.73759	0	0
cell survival of carcinoma cell lines	0	2.73759	0	0
neoplasia of sarcoma cell lines	0	2.73759	0	0
size of islet cells	0	2.73759	0	0
lack of spontaneous movement	0	2.73759	0	0
Hirschsprung disease 1	0	2.73759	0	0
differentiation of smooth muscle cells	0	2.72939	0	0
colon tumor	0	2.72931	0	0
arrest in G2/M phase transition	0	0	2.72818	0
formation of hair follicle	0	0	2.72033	0
neurological signs	0	2.71617	0	0
abnormal conduction by cardiac conduction system	0	0	0	2.7011
density of blood vessel	0	0	2.69816	0
proliferation of prostate cancer cell lines	0	0	2.69492	0
induction of embryonic tissue	0	0	2.69384	0
targeting of vesicles	0	0	2.69384	0
catabolism of glutamine family amino acid	0	0	2.69384	0
colorectal carcinoma	0	2.68213	0	0
irido-corneo-trabecular dysgenesis	0	2.68047	0	0
organization of embryonic tissue	0	2.68047	0	0
transendothelial migration of carcinoma cell lines	0	2.68047	0	0
maturation of spermatids	0	2.68047	0	0
arrest in G2 phase of squamous cell carcinoma cell lines	0	2.68047	0	0
loss of Paneth cells	0	2.68047	0	0
outgrowth of ganglion cells	0	2.68047	0	0
abnormal morphology of optic chiasm	0	2.68047	0	0
transendothelial migration of lung cancer cell lines	0	2.68047	0	0
abnormal morphology of common crus	0	2.68047	0	0
loss of vestibular ganglion neurons	0	2.68047	0	0
lack of supraoccipital bone	0	2.68047	0	0
onset of apoptosis	0	2.68047	0	0
response of cortical neurons	0	2.68047	0	0
loss of cochlea cells	0	2.68047	0	0
quantity of Merkel cells	0	2.68047	0	0
delay in cell cycle progression of fibroblast cell lines	0	2.68047	0	0
formation of endocrine gland	0	0	2.67609	0
colon cancer	0	2.67477	0	0
development of extraembryonic tissue	0	0	2.6726	0
neurogenic muscular atrophy	0	2.66606	0	0
abnormal morphology of otolith organ	0	2.66313	0	0
size of vesicles	0	2.66313	0	0
homeostasis of Na+	0	2.66313	0	0
atrophy of hindlimb muscle	0	2.66313	0	0
uterine cancer	0	0	0	2.66097
development of colony forming multilineage cells	0	0	2.65021	0
recruitment of bone marrow cells	0	0	2.65021	0
radiosensitivity of cervical cancer cell lines	0	0	2.65021	0
modification of glutamine	0	0	2.65021	0
development of B cell lymphoma cells	0	0	2.65021	0
thickness of arterial wall	0	0	2.65021	0
abnormal morphology of epithalamus	0	0	2.65021	0
growth of myocardium	0	0	2.65021	0
refractory B-cell non-Hodgkin lymphoma	0	0	2.65021	0
adult-onset leukoencephalopathy with vanishing white matter	0	0	2.65021	0
cell spreading of cervical cancer cell lines	0	0	0	2.64792
apoptosis of brain cells	0	2.64156	0	0
formation of pathological cyst	0	0	2.63589	0
cell proliferation of hematopoietic cell lines	0	0	2.62856	0
length of neurons	0	2.62617	0	0
endometrioid carcinoma	0	0	0	2.62438
abnormal morphology of axial skeleton	0	0	0	2.62223
cell viability of lung cancer cell lines	0	2.6206	0	0
familial nephrotic syndrome	0	0	2.61955	0
necrosis of epithelial tissue	0	2.61797	0	0
differentiation of adipocytes	0	2.60809	0	0
abnormal morphology of skeleton	0	0	0	2.60536
development of dentate gyrus	0	2.60186	0	0
fate determination of cells	0	2.60186	0	0
hypokinesis	0	2.60186	0	0
formation of secondary palate	0	0	2.59967	0
abnormal morphology of cerebral neocortex	0	0	0	2.59794
quantity of outer hair cells	0	0	0	2.59794
familial arrhythmia	0	0	2.58843	0
hypothyroidism	0	0	2.58843	0
migration of breast cancer cell lines	0	0	2.58599	0
patterning of body axis	0	0	0	2.58343
cycling of centrosome	0	0	2.57393	0
patterning of connective tissue	0	0	2.5691	0
endometrial cancer	0	0	0	2.55882
development of commissure	0	0	0	2.55082
abnormal morphology of sphenoid bone	0	0	0	2.55082
lymphopoiesis of leukocytes	0	0	2.54979	0
function of hepatocytes	0	0	2.54979	0
chemorepulsion of cells	0	0	2.54979	0
remyelination	0	0	2.54979	0
vocalization	0	0	2.5466	0
abnormal morphology of snout	0	0	2.53912	0
aortic valve disease	0	0	2.53912	0
blebbing	0	0	2.53912	0
breast or ovarian carcinoma	0	0	0	2.53594
abnormal morphology of ventricular septum	0	0	2.5097	0
grooming	0	0	2.5097	0
quantity of retinal ganglion cells	0	0	0	2.50624
abnormal morphology of scapula	0	0	0	2.50624
formation of thymus gland	0	0	2.49637	0
female genital tract adenocarcinoma	0	0	0	2.495
cell proliferation of leukocyte cell lines	0	0	2.49108	0
arrest in G2 phase of breast cancer cell lines	0	0	2.48409	0
abdominal hernia	0	0	2.48409	0
apoptosis of pro-B lymphocytes	0	0	2.48409	0
growth of dorsal root ganglion cells	0	0	2.4785	0
lack of adrenal gland	0	0	2.4785	0
senescence of hematopoietic cells	0	0	2.4785	0
release of hematopoietic progenitor cells	0	0	2.4785	0
transformation of T lymphocytes	0	0	2.4785	0
abnormal morphology of small adrenal gland	0	0	2.4785	0
quantity of gamma cells	0	0	2.4785	0
total end-diastolic diameter of left ventricle	0	0	2.4785	0
quantity of B-lymphocyte derived cell lines	0	0	2.4785	0
emigration of lymphocytes	0	0	2.4785	0
osteopenia of femur	0	0	2.4785	0
differentiation of erythroleukemia cells	0	0	2.4785	0
closure of neural tube	0	0	0	2.4734
synthesis of RNA	0	0	2.46658	0
mitotic index	0	0	0	2.46395
abnormal morphology of renal medulla	0	0	0	2.46395
adenocarcinoma in endometrium	0	0	0	2.45345
morphology of hematopoietic progenitor cells	0	0	2.43184	0
proliferation of pre-B lymphocytes	0	0	2.42827	0
development of female reproductive tract	0	0	2.42426	0
atrioventricular septal defect and common atrioventricular junction	0	0	0	2.42373
Brugada syndrome	0	0	2.42202	0
interphase of melanoma cell lines	0	0	2.42202	0
hydrocephalus	0	0	2.42153	0
differentiation of myeloid cells	0	0	2.41692	0
abnormal morphology of heart	0	0	0	2.41395
ductal pancreatic carcinoma	0	0	0	2.40934
abnormal morphology of mandible	0	0	0	2.40166
migration of endothelial cells	0	0	2.39671	0
hematopoiesis of hematopoietic cells	0	0	2.39101	0
binding of DNA	0	0	2.38677	0
abnormal morphology of bipolar cells	0	0	0	2.3854
quantity of tumor cell lines	0	0	2.38434	0
abnormal morphology of appendicular skeleton	0	0	0	2.38142
cell saturation density of fibroblasts	0	0	0	2.37938
clearance of Zaire ebolavirus	0	0	0	2.37938
outgrowth of glomerular capillary	0	0	0	2.37938
pluripotency of colony forming multilineage cells	0	0	0	2.37938
development of striatal patch	0	0	0	2.37938
hypoplasia of stomach	0	0	0	2.37938
development of hyoglossus muscle	0	0	0	2.37938
early infantile epileptic encephalopathy type 9	0	0	0	2.37938
development of macula densa	0	0	0	2.37938
spasticity of hindlimb	0	0	0	2.37938
loss of inhibitory interneurons	0	0	0	2.37938
Fanconi's anemia, group L	0	0	0	2.37938
development of Henle's loop	0	0	0	2.37938
morphology of right ventricular bundle branch	0	0	0	2.37938
migration of horizontal cells	0	0	0	2.37938
46, XY sex reversal type 9	0	0	0	2.37938
coordination of body trunk	0	0	0	2.37938
abnormal morphology of CD4 positive alpha-beta intraepithelial T-cell	0	0	0	2.37938
neurogenesis of locus ceruleus	0	0	0	2.37938
patterning of sinus venosus	0	0	0	2.37938
diaphragmatic hernia	0	0	0	2.37938
abnormal morphology of round window	0	0	0	2.37938
hypertrophy of cornea	0	0	0	2.37938
dysplasia of podocytes	0	0	0	2.37938
tumorigenesis of airway epithelial cells	0	0	0	2.37938
HIV-HTLV-1 co-infection	0	0	0	2.37938
lack of coronary sinus	0	0	0	2.37938
familial Holt-Oram syndrome	0	0	0	2.37938
development of external acoustic meatus	0	0	0	2.37938
afterhyperpolarization of CA3 neurons	0	0	0	2.37938
metaplasia of airway epithelial cells	0	0	0	2.37938
development of distal convoluted tubule	0	0	0	2.37938
arrest in G1/S phase transition of kidney cancer cell lines	0	0	0	2.37938
premature ovarian failure type 2A	0	0	0	2.37938
binding of basic transcription element	0	0	0	2.37938
commitment of neuroblasts	0	0	0	2.37938
formation of sling cells	0	0	0	2.37938
replicative senescence of melanoma cell lines	0	0	0	2.37938
ring dermoid of cornea	0	0	0	2.37938
abnormal morphology of superior vena cava	0	0	0	2.37938
abnormal morphology of diverticulum	0	0	0	2.37938
release of D-serine	0	0	0	2.37938
development of masseter muscle	0	0	0	2.37938
arrest in prometaphase of breast cancer cell lines	0	0	0	2.37938
abnormal morphology of atrioventricular bundle	0	0	0	2.37938
anisocoria	0	0	0	2.37938
development of genioglossus muscle	0	0	0	2.37938
hypoplasia of ventricular compact zone	0	0	0	2.37938
hypoplasia of pinna	0	0	0	2.37938
development of hippocampal fissure	0	0	0	2.37938
abnormal morphology of Purkinje system	0	0	0	2.37938
cerebellar ataxia, mental retardation, and dysequilibrium syndrome type 4	0	0	0	2.37938
fusion of glossopharyngeal cranial nerve ganglion	0	0	0	2.37938
mild growth failure	0	0	0	2.37938
Carpenter syndrome type 2	0	0	0	2.37938
quantity of pedicels	0	0	0	2.37938
progression of myoblasts	0	0	0	2.37938
neurogenesis of noradrenergic neurons	0	0	0	2.37938
Neurofibromatosis type 1-like syndrome	0	0	0	2.37938
abnormal morphology of enlarged ileum	0	0	0	2.37938
nail-patella syndrome	0	0	0	2.37938
abnormal morphology of oval window	0	0	0	2.37938
nephronophthisis 14	0	0	0	2.37938
cell viability of gonadotropes	0	0	0	2.37938
formation of organ of Corti	0	0	0	2.37938
migration of sling cells	0	0	0	2.37938
lack of endometrium	0	0	0	2.37938
neurogenesis of adrenergic neurons	0	0	0	2.37938
apoptosis of gonadotropes	0	0	0	2.37938
development of podocytes	0	0	0	2.37938
progression of DN1 cells	0	0	0	2.37938
iridogoniodysgenesis syndrome type 2	0	0	0	2.37938
specification of oligodendrocyte precursor cells	0	0	0	2.37938
familial hypertrophic cardiomyopathy-10	0	0	0	2.37938
organogenesis of thyroid gland	0	0	0	2.37938
meiosis of primordial germ cells	0	0	0	2.37938
survival of glutamatergic neuron	0	0	0	2.37938
presence of corpus callosum	0	0	0	2.37938
quantity of chromosomal DNA	0	0	0	2.37938
retinitis pigmentosa type 39	0	0	0	2.37938
disruption of Golgi spectrin skeletons	0	0	0	2.37938
branching of trigeminal ganglion neurons	0	0	0	2.37938
heterocellular hereditary persistence of fetal hemoglobin	0	0	0	2.37938
morphogenesis of superior vena cava	0	0	0	2.37938
morphology of left ventricular bundle branch	0	0	0	2.37938
cell division of neural stem cells	0	0	0	2.37938
differentiation of heart chamber	0	0	0	2.37938
deficiency of peripheral T lymphocyte	0	0	0	2.37938
abnormal morphology of dilated oviduct	0	0	0	2.37938
fusion of vagus cranial nerve ganglion	0	0	0	2.37938
disorganization of periodontal ligament	0	0	0	2.37938
tachycardia of atrium	0	0	0	2.37938
mislocalization of Purkinje cells	0	0	0	2.37938
function of thymocytes	0	0	0	2.37938
development of commissural neurons	0	0	0	2.37938
formation of forelimb bud	0	0	0	2.37938
hyperplasia of airway epithelial cells	0	0	0	2.37938
initiation of expression of RNA	0	0	2.37063	0
lymphopoiesis	0	0	2.37045	0
primary prostate cancer	0	0	2.36322	0
abnormal morphology of pulmonary artery	0	0	2.36322	0
condensation of cartilage tissue	0	0	2.36322	0
abnormal morphology of enlarged kidney	0	0	2.36322	0
development of lymphoma	0	0	2.35477	0
increased quantity of red blood cells	0	0	2.34949	0
congenital anomaly of genital system	0	0	2.34942	0
abnormal morphology of mandibular cartilage	0	0	0	2.34878
maturation of neurons	0	0	0	2.33915
abnormal morphology of mitral cell layer	0	0	2.33675	0
abnormal morphology of pedicels	0	0	2.33675	0
Cornelia de Lange syndrome	0	0	2.33675	0
morphogenesis of nephrogenic mesenchyme	0	0	2.33675	0
arrest in G2 phase of ovarian cancer cell lines	0	0	2.33675	0
formation of membrane tubule	0	0	2.33675	0
replicative senescence of tumor cell lines	0	0	2.33675	0
aggregation of kidney cell lines	0	0	2.33675	0
movement of retinal cells	0	0	2.33675	0
abnormal morphology of olfactory nerve	0	0	2.33675	0
degradation of monoamines	0	0	2.33675	0
hypertrophy of fibroblasts	0	0	2.33675	0
invasion of stem cells	0	0	2.33675	0
quantity of thyrotrophs	0	0	2.33675	0
entry into S phase of epithelial cell lines	0	0	2.33675	0
differentiation of hematopoietic cells	0	0	2.3231	0
formation of focal adhesions	0	0	2.32281	0
cleavage of cells	0	0	2.32281	0
colony survival of cells	0	0	2.31949	0
synthesis of steroid hormone	0	0	2.31813	0
ventricular hypertrophy	0	0	2.31443	0
abnormal morphology of dilated atrium	0	0	0	2.31374
lymphocytic leukemia	0	0	2.31191	0
conversion of connective tissue cells	0	0	2.30739	0
mental retardation	0	0	2.30678	0
hypertrophy of heart	0	0	2.29609	0
formation of epidermis	0	0	2.2874	0
abnormality of bone marrow cells	0	0	2.28512	0
transmembrane transport of ion	0	0	2.28512	0
abnormality of trophoblast giant cells	0	0	0	2.28016
quantity of embryo	0	0	0	2.27694
morphology of external ear	0	0	2.25426	0
synthesis of glucocorticoid	0	0	2.25426	0
quantity of hematopoietic cell lines	0	0	2.25426	0
abnormal morphology of enlarged heart	0	0	0	2.25154
formation of adrenal gland	0	0	0	2.24791
differentiation of endocrine cells	0	0	0	2.24791
scratching	0	0	0	2.24791
arrest in M phase of tumor cell lines	0	0	0	2.24791
development of artery	0	0	2.24766	0
uterine carcinoma	0	0	0	2.24474
abnormal morphology of neuroglia	0	0	0	2.22383
squamous-cell carcinoma	0	0	0	2.21814
vascular leak syndrome	0	0	0	2.18703
abnormal morphology of atrioventricular valve	0	0	0	2.18703
progression of cells	0	0	0	2.18703
shape change of tumor cell lines	0	0	0	2.18013
abnormal morphology of epithelial tissue	0	0	0	2.17763
hypoplasia of lung	0	0	0	2.15824
migration of brain cells	0	0	0	2.14471
patterning of embryo	0	0	0	2.14471
colony formation of fibroblast cell lines	0	0	0	2.14471
morphology of uterus	0	0	0	2.13206
quantity of Purkinje cells	0	0	0	2.1036
abnormal morphology of vitelline vessel	0	0	0	2.09501
senile hemangioma	0	0	0	2.07925
familial juvenile nephronophthisis	0	0	0	2.07925
neurogenesis of bipolar cells	0	0	0	2.07925
exit from mitosis of breast cancer cell lines	0	0	0	2.07925
adhesion of cornea	0	0	0	2.07925
degeneration of Wolffian duct	0	0	0	2.07925
replication of leukemia cell lines	0	0	0	2.07925
oxidation of lauric acid	0	0	0	2.07925
abnormal morphology of masticatory muscle	0	0	0	2.07925
proliferation of trophectoderm cells	0	0	0	2.07925
development of extraocular muscle	0	0	0	2.07925
growth of radial nerve	0	0	0	2.07925
growth of median nerve	0	0	0	2.07925
development of vestibular nucleus	0	0	0	2.07925
growth of mandibular process	0	0	0	2.07925
quantity of podocyte slit diaphragm	0	0	0	2.07925
arrest in differentiation of cord blood cells	0	0	0	2.07925
expansion of Rathke's pouch	0	0	0	2.07925
growth of ulnar nerve	0	0	0	2.07925
size of jaw	0	0	0	2.07925
lack of uterine horn	0	0	0	2.07925
formation of pedicels	0	0	0	2.07925
endoreduplication of megakaryocytes	0	0	0	2.07925
quantity of starburst amacrine cells	0	0	0	2.07925
hypoplasia of presphenoid bone	0	0	0	2.07925
arrest in differentiation of erythroblasts	0	0	0	2.07925
differentiation of follicular cells	0	0	0	2.07925
lack of tympanic membrane	0	0	0	2.07925
enlargement of thymus gland	0	0	0	2.07925
development of chromaffin cells	0	0	0	2.07925
size of superior colliculus	0	0	0	2.07925
quantity of myotube	0	0	0	2.07925
antiproliferative response of hematopoietic cells	0	0	0	2.07925
abnormal morphology of malleal processus brevis	0	0	0	2.07925
development of pulmonary myocardium	0	0	0	2.07925
development of cervix	0	0	0	2.07925
delay in initiation of metaphase/anaphase transition of cervical cancer cell lines	0	0	0	2.07925
morphogenesis of pulmonary vein	0	0	0	2.07925
guidance of fiber tract	0	0	0	2.07925
formation of intrahepatic bile duct	0	0	0	2.07925
lack of turbinate bone	0	0	0	2.07925
development of molecular layer of cerebral cortex	0	0	0	2.07925
abnormal morphology of medial ganglionic eminences	0	0	0	2.07925
reinforcement	0	0	0	2.07925
mitosis of keratinocytes	0	0	0	2.07925
arrest in mitosis of breast cancer cell lines	0	0	0	2.07925
apoptosis of intraepithelial T lymphocytes	0	0	0	2.07925
development of callosal axon	0	0	0	2.07925
abnormal morphology of maxillary nerve	0	0	0	2.07925
apoptosis of endocardial cells	0	0	0	2.07925
cytolysis of intraepithelial T lymphocytes	0	0	0	2.07925
neurogenesis of sympathetic ganglia	0	0	0	2.07925
extension of parallel fiber	0	0	0	2.07925
acephaly	0	0	0	2.07925
cleavage of glomerular basement membrane	0	0	0	2.07925
detachment of macrophages	0	0	0	2.07925
conversion of neuroglia	0	0	0	2.07925
abnormal morphology of Henle's loop	0	0	0	2.07925
development of roof plate	0	0	0	2.07925
eruption of incisor	0	0	0	2.07925
bleeding of subcutaneous tissue	0	0	0	2.07925
adhesion of iris	0	0	0	2.07925
synaptic transmission of medium spiny neurons	0	0	0	2.07925
lack of ilium	0	0	0	2.07925
mineralization of muscle cell lines	0	0	0	2.07925
hypoplasia of gonadal ridge	0	0	0	2.07925
arrest in maturation of B lymphocytes	0	0	0	2.07925
development of mesothelium	0	0	0	2.07925
formation of podocyte slit diaphragm	0	0	0	2.07925
quantity of fenestra	0	0	0	2.07925
formation of axon branches	0	0	0	2.07925
Usher syndrome type IIA	0	0	0	2.07925
hypoplasia of iris stroma	0	0	0	2.07925
formation of mylohyoid muscle	0	0	0	2.07925
development of duodenum	0	0	0	2.07925
migration of cortical neurons	0	0	0	2.07762
abnormal morphology of incisor	0	0	0	2.07762
abnormal function of inner ear	0	0	0	2.07762
congenital anomaly of limb	0	0	0	2.05114
development of rib cage	0	0	0	2.02807
abnormal morphology of ureter	0	0	0	2.02807
thigmotaxis	0	0	0	2.00442
valvulopathy	0	0	0	1.99104
Edema	0	0	0	1.98815
maturation of cells	0	0	0	1.96988

## Sheet: IPA_custom_list
Custom list	All	Hyper	Hypo	CNE	-LOG(Pvalues)
Adipose tissue development	3.13	3.05	1.8

[truncated: 1 more sheets: DMCs_for_bisPCR2]
